# Supplementary material for: RES complex is associated with intron definition and required for zebrafish early embryogenesis
Source: PLoS Genet. 2018 Jul 3;14(7):e1007473. doi: 10.1371/journal.pgen.1007473 (PMC6047831; doi:10.1371/journal.pgen.1007473)
Supplement: S3 Table — (XLSX) [file pgen.1007473.s003.xlsx]

## Sheet: list_intron_features_for_paper.
NUMBER (Supp Fig. 11b)	FEATURE DESCRIPTION	SHORT NAME	USED FOR LOGISTIC REGRESSION	REASON FOR NEGLECTING	MEAN_COEFFICIENT	MC_DELTA	95%CI	TIMES_OF_SELECTION_BY_LASSO	MEAN_PERCENTUAL_DECREASE_OF_NULL_DEVIANCE	MPD_DELTA_95CONFINT	TIMES_PVAL_0001	MEAN_AREA_ROC	MAR_DELTA_95CONFINT	MEAN_AREA_PR	MAP_DELTA_95CONFINT
3	INTRON LENGTH	LENGTH	YES	NONE	-8.98602e-05	1.18435e-07	2.32132e-07	10000	0.0229433	3.01491e-05	10000	0.625341	0.000321493	0.703814	0.000264255
21	UPSTREAM EXON MEDIAN LENGTH	UE LENGTH	YES	NONE	0.000653264	2.27583e-06	4.46063e-06	10000	0.023763	3.37662e-05	10000	0.527554	0.000330396	0.608097	0.000268611
6	DOWNSTREAM EXON MEDIAN LENGTH	DE LENGTH	YES	NONE	0.00140574	2.62169e-06	5.1385e-06	10000	0.0978871	6.3553e-05	10000	0.623176	0.000322439	0.709696	0.000267067
4	RATIO UPSTREAM EXON LENGTH OVER INTRON LENGTH	R UE INT LENGTH	YES	NONE	0.193468	0.00056741	0.00111212	10000	0.0411271	5.24281e-05	10000	0.625176	0.000319955	0.659068	0.000304117
1	RATIO DOWNSTREAM EXON LENGTH OVER INTRON LENGTH	R DE INT LENGTH	YES	NONE	0.0466149	0.000480787	0.000942342	7533	0.0782134	8.62489e-05	10000	0.682404	0.000302045	0.716284	0.000285369
10	INTRON GCC	GCC	YES	NONE	1.16985	0.0121001	0.0237161	7795	0.0229544	3.29265e-05	10000	0.594812	0.000326401	0.619914	0.000310838
16	UPSTREAM EXON GCC	UE GCC	YES	NONE	-0.192686	0.00455775	0.0089332	2855	0.00649589	1.71664e-05	9889	0.5538	0.000329768	0.584625	0.000289429
9	DOWNSTREAM EXON GCC	DE GCC	YES	NONE	-0.134755	0.00429216	0.00841263	1833	0.0304176	3.59513e-05	10000	0.616117	0.000324056	0.65384	0.000315291
5	RATIO UPSTREAM EXON GCC OVER INTRON GCC	R UE INT GCC	YES	NONE	-0.547465	0.00197254	0.00386619	9810	0.034113	3.86832e-05	10000	0.625045	0.000318792	0.638695	0.000315864
2	RATIO DOWNSTREAM EXON GCC OVER INTRON GCC	R DE INT GCC	YES	NONE	-0.852635	0.00197078	0.00386274	9967	0.0582779	4.91973e-05	10000	0.665591	0.000310202	0.685924	0.000316742
24	GCC OF 20 INTRON and 10 EXON POSITIONS AT 5 PRIME INTRON END	SS5 GCC	YES	NONE	-0.608598	0.00387778	0.00760045	9233	0.000641561	5.30111e-06	14	0.516611	0.000338186	0.611543	0.000296598
25	GCC OF 20 INTRON and 10 EXON POSITIONS AT 3 PRIME INTRON END	SS3 GCC	YES	NONE	0.00752553	0.00147652	0.00289397	2776	0.000558316	4.90412e-06	5	0.509202	0.000335344	0.612417	0.000294414
13	HIGHEST PWM SCORE FOR HUMAN SF1 IN 150 NT INTRON 3 PRIME ENDS	SF1	YES	NONE	-0.0974788	0.000295755	0.000579679	9995	0.00955002	2.01898e-05	9999	0.560958	0.000330005	0.600168	0.000292088
27	MAXENT SCORE OF 5SS	MAXENT 5SS	YES	NONE	0.00464673	8.53865e-05	0.000167358	5203	0.000173305	2.29975e-06	0	0.503878	0.000371599	0.544549	0.00024303
30	MAXENT SCORE OF 3SS	MAXENT 3SS	YES	NONE	-0.0154825	0.000173314	0.000339696	6850	0.000357062	3.70438e-06	1	0.499405	0.00033717	0.552228	0.000252494
18	DISTANCE OF BEST PREDICTED BP TO 3SS	DIST MAXBP	YES	NONE	0.000254592	6.59107e-06	1.29185e-05	2865	0.00246354	1.07015e-05	2517	0.536414	0.000330566	0.58267	0.000275314
17	SCORE OF SEQUENCE OF BEST PREDICTED BP	MAXBP SEQ SCR	YES	NONE	-0.000679026	6.44803e-05	0.000126381	737	0.00457291	1.45456e-05	8457	0.545189	0.000336724	0.57388	0.000282241
26	PYRIMIDINE CONTENT FOR BEST PREDICTED BP	PYR CONT MAXBP	YES	NONE	0.314116	0.00345628	0.0067743	7264	0.000455982	4.38927e-06	7	0.508807	0.000342108	0.551788	0.00024879
19	POLYPYRIMIDINE TRACT OFFSET FOR BEST PREDICTED BP	PPYRT OFFS MAXBP	YES	NONE	0.00605825	5.84784e-05	0.000114618	7528	0.00432057	1.45502e-05	7822	0.531116	0.000318111	0.660412	0.000224015
23	POLYPYRIMIDINE TRACT LENGTH FOR BEST PREDICTED BP	PPYRT LEN MAXBP	YES	NONE	0.00863531	4.4694e-05	8.76002e-05	9917	0.000239301	2.60753e-06	0	0.482972	0.000332648	0.555783	0.000260864
28	POLYPYRIMIDINE TRACT SCORE FOR BEST PREDICTED BP	PPYRT SCR MAXBP	YES	NONE	-0.000426147	1.68038e-05	3.29354e-05	1052	0.000108775	1.55889e-06	0	0.496548	0.000369152	0.558641	0.000314397
14	SCORE OF BEST PREDICTED BP	MAXBP SCR	YES	NONE	-0.0768541	0.00101191	0.00198334	5530	0.00796022	1.90228e-05	9987	0.560491	0.000331688	0.592851	0.000301021
11	NUMBER OF PREDICTED BPS	N BPS	YES	NONE	-0.0697178	0.000168518	0.000330295	10000	0.0167041	2.74257e-05	10000	0.594192	0.000321705	0.725273	0.000269495
31	MEDIAN DISTANCE OF PREDICTED BPS TO 3SS	DIST BPS	NO	DISTANCE OF BEST PREDICTED BP TO 3SS USED INSTEAD
32	MEDIAN SCORE OF SEQUENCES OF PREDICTED BPS	BPS SEQ SCR	NO	SCORE OF SEQUENCE OF BEST PREDICTED BP USED INSTEAD
33	MEDIAN PYRIMIDINE CONTENT OF PREDICTED BPS	PYR CONT BPS	NO	PYRIMIDINE CONTENT FOR BEST PREDICTED BP USED INSTEAD
34	MEDIAN POLYPYRIMIDINE TRACT OFFSET FOR PREDICTED BPS	PPYRT OFFS BPS	NO	POLYPYRIMIDINE TRACT OFFSET FOR BEST PREDICTED BP USED INSTEAD
35	MEDIAN POLYPYRIMIDINE TRACT LENGTH FOR PREDICTED BPS	PPYRT LEN BPS	NO	POLYPYRIMIDINE TRACT LENGTH FOR BEST PREDICTED BP USED INSTEAD
36	MEDIAN POLYPYRIMIDINE TRACT SCORE FOR PREDICTED BPS	PPYRT SCR BPS	NO	POLYPYRIMIDINE TRACT SCORE FOR BEST PREDICTED BP USED INSTEAD
37	MEDIAN SCORE OF PREDICTED BPS	BPS SCR	NO	SCORE OF BEST PREDICTED BP USED INSTEAD
38	MEDIAN INTRON NUMBER OF TRANSCRIPTS	INT NUM	NO	CORRELATED WITH IS LAST
39	MEDIAN RELATIVE RANK OF INTRON IN TRANSCRIPTS	RANK	NO	RELATIVE POSITION OF INTRON IN TRANSCRIPT IS COVERED BY COMBINATION OF IS FIRST AND IS LAST
40	MEDIAN RELATIVE RANK OF INTRON IN TRANSCRIPTS BINNED INTO 3 BINS	RANK 3BINS	NO	RELATIVE POSITION OF INTRON IN TRANSCRIPT IS COVERED BY COMBINATION OF IS FIRST AND IS LAST
41	MEDIAN RELATIVE RANK OF INTRON IN TRANSCRIPTS BINNED INTO 5 BINS	RANK 5BINS	NO	RELATIVE POSITION OF INTRON IN TRANSCRIPT IS COVERED BY COMBINATION OF IS FIRST AND IS LAST
42	MEDIAN RELATIVE RANK OF INTRON IN TRANSCRIPTS BINNED INTO 10 BINS	RANK 10BINS	NO	RELATIVE POSITION OF INTRON IN TRANSCRIPT IS COVERED BY COMBINATION OF IS FIRST AND IS LAST
43	NUMBER OF TRANSCRIPTS FOR GENE	NUM TR	NO	IS GENE FEATURE BUT NO INTRON FEATURE
22	PROPORTION OF TRANSCRIPTS WHERE INTRON IS FIRST INTRON	IS FIRST	YES	NONE	0.642763	0.00113437	0.00222337	10000	0.00486633	1.54908e-05	8783	0.527357	0.000191801	0.922021	0.000173431
8	PROPORTION OF TRANSCRIPTS WHERE INTRON IS INTERNAL INTRON	IS LAST	YES	NONE	1.06816	0.00144107	0.00282449	10000	0.0781371	5.61307e-05	10000	0.619316	0.000204659	0.964639	0.000120801
44	PROPORTION OF TRANSCRIPTS WHERE INTRON IS LAST INTRON	IS INTRL	NO	RELATIVE POSITION OF INTRON IN TRANSCRIPT IS COVERED BY COMBINATION OF IS FIRST AND IS LAST
29	PROPORTION OF TRANSCRIPTS WHERE INTRON IS IN UTR	IN UTR	YES	NONE	0.433975	0.00506263	0.00992276	6954	0.000532685	5.47172e-06	0	0.500981	3.58286e-05	0.997574	3.98659e-05
41	INTRON COOCCURS WITH OTHER RETAINED INTRONS	COOC	YES	NONE	-0.194174	0.00206656	0.00405046	7200	0.0162654	2.60919e-05	10000	0.528923	0.000114208	0.987465	8.77434e-05
15	INTERACTION: MAXENT 3SS x MAXBP SCR	MAXENT 3SS x MAXBP SCR	YES	NONE	-0.0191306	0.000118814	0.000232875	8628	0.00626334	1.66569e-05	9833	0.557866	0.000333237	0.596303	0.000304298
12	GENE EXPRESSION IN WT 32 HPF	GEXP WT 32	YES	NONE	1.64464e-05	2.20479e-06	4.3214e-06	74	0.028423	4.31925e-05	10000	0.564472	0.000336608	0.569447	0.000192543
7	GENE EXPRESSION IN WT 48 HPF	GEXP WT 48	YES	NONE	-0.00985051	2.33437e-05	4.57537e-05	10000	0.0490172	6.64659e-05	10000	0.620768	0.000324663	0.607597	0.000260648
