# Supplementary material for: RES complex is associated with intron definition and required for zebrafish early embryogenesis
Source: PLoS Genet. 2018 Jul 3;14(7):e1007473. doi: 10.1371/journal.pgen.1007473 (PMC6047831; doi:10.1371/journal.pgen.1007473)
Supplement: S6 Table — (TAB) [file pgen.1007473.s006.tab]

GENE	EVENT	COORD	LENGTH	FullCO	TYPE_DURING_LOGREG_BUD13	MEAN_PREDSCORE_LOGREG_BUD13	TYPE_DURING_LOGREG_RBMX2	MEAN_PREDSCORE_LOGREG_RBMX2	TYPE_DURING_LOGREG_SNIP1	MEAN_PREDSCORE_LOGREG_SNIP1	IS_INDEPENDENT_VALIDATION_INTRON
BX927114.1	DreINT0002644	chr1:57081000-57092378	11379	chr1:57080692-57080999=57092379-57092419:+	none	0.440800765086889	none	0.437648859609092	none	0.579659915045532	TRUE
BX927114.1	DreINT0002645	chr1:57092420-57092636	217	chr1:57092379-57092419=57092637-57092776:+	none	0.585659899137149	none	0.574003112501468	none	0.646985114659429	TRUE
BX927114.1	DreINT0002646	chr1:57092777-57092871	95	chr1:57092637-57092776=57092872-57092938:+	none	0.734028205613076	none	0.699584044785772	none	0.780698973804366	TRUE
BX927114.1	DreINT0002647	chr1:57092939-57093123	185	chr1:57092872-57092938=57093124-57093167:+	none	0.642259496284019	none	0.651126534230922	none	0.593186539462166	TRUE
BX927114.1	DreINT0002648	chr1:57093168-57093282	115	chr1:57093124-57093167=57093283-57093409:+	none	0.50230935542338	none	0.539085136138103	none	0.57886495141489	TRUE
BX927114.1	DreINT0002649	chr1:57093410-57093472	63	chr1:57093283-57093409=57093473-57093534:+	none	0.930404128542028	none	0.908567446818043	none	0.95130761020011	TRUE
pibf1	DreINT0113911	chr1:33952440-33952710	271	chr1:33952711-33952761=33952181-33952439:-	none	0.664648178808885	none	0.685970005015736	none	0.612893910946715	TRUE
pibf1	DreINT0113920	chr1:33952081-33952180	100	chr1:33952181-33952439=33951980-33952080:-	none	0.702329560991955	none	0.680770794330662	none	0.644985824794972	TRUE
pibf1	DreINT0113921	chr1:33950777-33951979	1203	chr1:33951980-33952080=33950578-33950776:-	none	0.375345177844367	none	0.430188228447011	none	0.386797230580048	TRUE
pibf1	DreINT0113922	chr1:33950477-33950577	101	chr1:33950578-33950776=33950357-33950476:-	none	0.554112606712211	none	0.519493853642675	none	0.587757660355048	TRUE
pibf1	DreINT0113923	chr1:33950259-33950356	98	chr1:33950357-33950476=33950125-33950258:-	none	0.595171525462363	none	0.565017724458158	none	0.627749970727725	TRUE
pibf1	DreINT0113924	chr1:33949325-33950124	800	chr1:33950125-33950258=33949216-33949324:-	none	0.377250948661625	none	0.402974955710096	none	0.45406370957591	TRUE
pibf1	DreINT0113925	chr1:33947312-33949215	1904	chr1:33949216-33949324=33947130-33947311:-	none	0.504660663125865	none	0.557009481258417	none	0.486710155217277	TRUE
pibf1	DreINT0113926	chr1:33946949-33947129	181	chr1:33947130-33947311=33946823-33946948:-	none	0.538441018638775	none	0.538839829989294	none	0.592959885833337	TRUE
pibf1	DreINT0113927	chr1:33944454-33946822	2369	chr1:33946823-33946948=33944355-33944453:-	none	0.504892781515811	none	0.555443750179404	none	0.481696720058786	TRUE
pibf1	DreINT0113912	chr1:33932932-33944354	11423	chr1:33944355-33944453=33932766-33932931:-	none	0.251238561698224	none	0.371068599335702	none	0.341374535531367	TRUE
pibf1	DreINT0113913	chr1:33931261-33932765	1505	chr1:33932766-33932931=33931110-33931260:-	none	0.257384876631546	none	0.311157014566097	none	0.416647603480655	TRUE
pibf1	DreINT0113914	chr1:33925635-33931109	5475	chr1:33931110-33931260=33925544-33925634:-	none	0.345006655669002	none	0.433952311198957	none	0.497402061548025	TRUE
pibf1	DreINT0113915	chr1:33925402-33925543	142	chr1:33925544-33925634=33925299-33925401:-	none	0.463968540781075	none	0.506653463277581	none	0.543641723044857	TRUE
pibf1	DreINT0113916	chr1:33907016-33925298	18283	chr1:33925299-33925401=33906885-33907015:-	none	0.0961921077309622	none	0.146432865983196	none	0.301185208387743	TRUE
pibf1	DreINT0113917	chr1:33901200-33906884	5685	chr1:33906885-33907015=33901115-33901199:-	none	0.430318719187485	none	0.461327807053711	none	0.468799906854938	TRUE
pibf1	DreINT0113918	chr1:33885164-33901114	15951	chr1:33901115-33901199=33885005-33885163:-	none	0.135557758102739	none	0.187730994106406	none	0.305761722725467	TRUE
pibf1	DreINT0113919	chr1:33883706-33885004	1299	chr1:33885005-33885163=33883488-33883705:-	none	0.538055384083355	none	0.566178523327779	none	0.681324802604382	TRUE
col5a3b	DreINT0050085	chr1:58577450-58580852	3403	chr1:58580853-58581062=58577282-58577449:-	none	0.514774703916758	none	0.513697991290403	none	0.384628792853409	TRUE
col5a3b	DreINT0050096	chr1:58576581-58577281	701	chr1:58577282-58577449=58576367-58576580:-	NOT_RETAINED	0.31608053719085	NOT_RETAINED	0.416024203144853	NOT_RETAINED	0.285202832203253	FALSE
col5a3b	DreINT0050107	chr1:58574396-58576366	1971	chr1:58576367-58576580=58574233-58574395:-	none	0.390648423187894	none	0.524169693242102	none	0.408361609990028	FALSE
col5a3b	DreINT0050118	chr1:58573902-58574232	331	chr1:58574233-58574395=58573779-58573901:-	none	0.25913840467913	none	0.322231378401611	none	0.336878971914342	FALSE
col5a3b	DreINT0050129	chr1:58573371-58573778	408	chr1:58573779-58573901=58573263-58573370:-	none	0.333801238612218	none	0.424309334821614	none	0.382916758526755	FALSE
col5a3b	DreINT0050132	chr1:58573009-58573262	254	chr1:58573263-58573370=58572886-58573008:-	none	0.404387459590446	none	0.429050306118679	none	0.370103423354018	FALSE
col5a3b	DreINT0050133	chr1:58572704-58572885	182	chr1:58572886-58573008=58572611-58572703:-	NOT_RETAINED	0.415821256813029	NOT_RETAINED	0.444768306860055	NOT_RETAINED	0.399831874558012	FALSE
col5a3b	DreINT0050134	chr1:58572522-58572610	89	chr1:58572611-58572703=58572459-58572521:-	NOT_RETAINED	0.332808333223142	NOT_RETAINED	0.369712861653231	NOT_RETAINED	0.335268664921942	FALSE
col5a3b	DreINT0050135	chr1:58572384-58572458	75	chr1:58572459-58572521=58572309-58572383:-	none	0.280260999554288	none	0.313028363886079	none	0.386390107446716	FALSE
col5a3b	DreINT0050086	chr1:58572167-58572308	142	chr1:58572309-58572383=58572083-58572166:-	none	0.249638800774478	none	0.292142234799445	none	0.315582083750301	FALSE
col5a3b	DreINT0050087	chr1:58569443-58572082	2640	chr1:58572083-58572166=58569386-58569442:-	none	0.0906549957367983	none	0.120119653019485	none	0.112204670562894	TRUE
col5a3b	DreINT0050088	chr1:58569229-58569385	157	chr1:58569386-58569442=58569175-58569228:-	none	0.291757482834625	none	0.350409586629974	none	0.348264105559127	TRUE
col5a3b	DreINT0050089	chr1:58568985-58569174	190	chr1:58569175-58569228=58568931-58568984:-	none	0.312953565506476	none	0.369300539546321	none	0.453127920797843	FALSE
col5a3b	DreINT0050090	chr1:58568491-58568930	440	chr1:58568931-58568984=58568437-58568490:-	none	0.328911726414097	none	0.374857472104681	none	0.301044133531721	FALSE
col5a3b	DreINT0050091	chr1:58568289-58568436	148	chr1:58568437-58568490=58568235-58568288:-	none	0.230864573625192	none	0.266830591632208	none	0.301392697137402	FALSE
col5a3b	DreINT0050092	chr1:58568127-58568234	108	chr1:58568235-58568288=58568073-58568126:-	none	0.160765964202027	none	0.196084275552382	none	0.209922346524045	FALSE
col5a3b	DreINT0050093	chr1:58567963-58568072	110	chr1:58568073-58568126=58567918-58567962:-	NOT_RETAINED	0.335364335161108	NOT_RETAINED	0.349264493955732	NOT_RETAINED	0.378263933062547	FALSE
col5a3b	DreINT0050094	chr1:58567801-58567917	117	chr1:58567918-58567962=58567747-58567800:-	none	0.234829525242768	none	0.26211661236318	none	0.319809191520257	FALSE
col5a3b	DreINT0050095	chr1:58567668-58567746	79	chr1:58567747-58567800=58567623-58567667:-	none	0.448773087613412	none	0.488559451071615	none	0.435914915076547	FALSE
col5a3b	DreINT0050097	chr1:58566908-58567622	715	chr1:58567623-58567667=58566854-58566907:-	NOT_RETAINED	0.135801234370459	NOT_RETAINED	0.184874408162555	NOT_RETAINED	0.167112582659621	FALSE
col5a3b	DreINT0050098	chr1:58566777-58566853	77	chr1:58566854-58566907=58566732-58566776:-	none	0.292249661839803	none	0.310144632164518	none	0.324225269185409	TRUE
col5a3b	DreINT0050099	chr1:58566617-58566731	115	chr1:58566732-58566776=58566563-58566616:-	NOT_RETAINED	0.388823756457986	NOT_RETAINED	0.437449372523311	NOT_RETAINED	0.338519491077808	FALSE
col5a3b	DreINT0050100	chr1:58566468-58566562	95	chr1:58566563-58566616=58566423-58566467:-	none	0.356353477660249	none	0.425118698659215	none	0.471576105810796	FALSE
col5a3b	DreINT0050101	chr1:58566336-58566422	87	chr1:58566423-58566467=58566282-58566335:-	none	0.253297247669226	none	0.288357895239496	none	0.324035951691997	FALSE
col5a3b	DreINT0050102	chr1:58566072-58566281	210	chr1:58566282-58566335=58566027-58566071:-	none	0.261910025611328	none	0.254872642715156	none	0.361583647458808	FALSE
col5a3b	DreINT0050103	chr1:58565551-58566026	476	chr1:58566027-58566071=58565497-58565550:-	none	0.339960370986242	none	0.380670205730701	none	0.352330631558835	TRUE
col5a3b	DreINT0050104	chr1:58565400-58565496	97	chr1:58565497-58565550=58565292-58565399:-	none	0.349096862492509	none	0.365308105271549	none	0.323339871442862	FALSE
col5a3b	DreINT0050105	chr1:58565018-58565291	274	chr1:58565292-58565399=58564964-58565017:-	none	0.164608451659838	none	0.246489984040765	none	0.234271236826785	FALSE
col5a3b	DreINT0050106	chr1:58564873-58564963	91	chr1:58564964-58565017=58564819-58564872:-	none	0.223614956212149	none	0.241570213716836	none	0.276815812763557	FALSE
col5a3b	DreINT0050108	chr1:58564088-58564818	731	chr1:58564819-58564872=58564043-58564087:-	none	0.215608216776735	none	0.237605319716855	none	0.227546556605447	FALSE
col5a3b	DreINT0050109	chr1:58563958-58564042	85	chr1:58564043-58564087=58563904-58563957:-	none	0.341425147191065	none	0.404117692692167	none	0.372861474631084	FALSE
col5a3b	DreINT0050110	chr1:58563828-58563903	76	chr1:58563904-58563957=58563783-58563827:-	none	0.293215685487456	none	0.352577112740487	none	0.355381806255083	FALSE
col5a3b	DreINT0050111	chr1:58563248-58563782	535	chr1:58563783-58563827=58563194-58563247:-	none	0.299474966162501	none	0.368374270641721	none	0.26820307522939	FALSE
col5a3b	DreINT0050112	chr1:58563116-58563193	78	chr1:58563194-58563247=58563062-58563115:-	none	0.319090160734886	none	0.371011332460848	none	0.267453372390904	FALSE
col5a3b	DreINT0050113	chr1:58562948-58563061	114	chr1:58563062-58563115=58562894-58562947:-	none	0.146277562778852	none	0.215542191455882	none	0.194208441166857	FALSE
col5a3b	DreINT0050114	chr1:58562783-58562893	111	chr1:58562894-58562947=58562675-58562782:-	none	0.357475424249136	none	0.38873314707007	none	0.395106073147873	FALSE
col5a3b	DreINT0050115	chr1:58562587-58562674	88	chr1:58562675-58562782=58562497-58562586:-	NOT_RETAINED	0.321709465585332	NOT_RETAINED	0.347651676555057	NOT_RETAINED	0.287248635111487	FALSE
col5a3b	DreINT0050116	chr1:58562416-58562496	81	chr1:58562497-58562586=58562362-58562415:-	none	0.298217660037933	none	0.329967519331903	none	0.343107584199558	FALSE
col5a3b	DreINT0050117	chr1:58562275-58562361	87	chr1:58562362-58562415=58562167-58562274:-	none	0.214026345673582	none	0.247346114135665	none	0.233056798546694	FALSE
col5a3b	DreINT0050119	chr1:58562086-58562166	81	chr1:58562167-58562274=58561978-58562085:-	none	0.42430568847979	none	0.464032336565863	none	0.486720412298047	FALSE
col5a3b	DreINT0050120	chr1:58557425-58561977	4553	chr1:58561978-58562085=58557371-58557424:-	none	0.221302549374466	none	0.25009838582594	none	0.309813109585722	TRUE
col5a3b	DreINT0050121	chr1:58557283-58557370	88	chr1:58557371-58557424=58557229-58557282:-	none	0.29912276665609	none	0.325572665550294	none	0.226535285233323	FALSE
col5a3b	DreINT0050122	chr1:58557128-58557228	101	chr1:58557229-58557282=58557020-58557127:-	none	0.261550516822098	none	0.340727059226192	none	0.30679111890104	FALSE
col5a3b	DreINT0050123	chr1:58556903-58557019	117	chr1:58557020-58557127=58556849-58556902:-	none	0.337659882563863	none	0.34830904947029	none	0.443755035507221	FALSE
col5a3b	DreINT0050124	chr1:58556757-58556848	92	chr1:58556849-58556902=58556703-58556756:-	none	0.479353183055094	none	0.538386796136454	none	0.471904758763652	FALSE
col5a3b	DreINT0050125	chr1:58556500-58556702	203	chr1:58556703-58556756=58556446-58556499:-	none	0.1263252575595	none	0.156165989214074	none	0.165408036325367	FALSE
col5a3b	DreINT0050126	chr1:58556374-58556445	72	chr1:58556446-58556499=58556320-58556373:-	none	0.37724337442779	none	0.396596715333574	none	0.316457436797321	FALSE
col5a3b	DreINT0050127	chr1:58556223-58556319	97	chr1:58556320-58556373=58556115-58556222:-	none	0.362198866932595	none	0.43525252555534	none	0.342453854774542	FALSE
col5a3b	DreINT0050128	chr1:58554106-58556114	2009	chr1:58556115-58556222=58554052-58554105:-	none	0.282172044958193	none	0.363795707065529	none	0.359346426299336	FALSE
col5a3b	DreINT0050130	chr1:58553978-58554051	74	chr1:58554052-58554105=58553924-58553977:-	none	0.473013541200187	none	0.501056722325626	none	0.407865216098509	FALSE
col5a3b	DreINT0050131	chr1:58553702-58553923	222	chr1:58553924-58553977=58553648-58553701:-	none	0.603716446119122	none	0.670243171564781	none	0.615376775140758	TRUE
klf12a	DreINT0086838	chr1:33795311-33807684	12374	chr1:33795229-33795310=33807685-33808249:+	none	0.343942490467175	none	0.449492288904145	none	0.49034340418871	TRUE
klf12a	DreINT0086839	chr1:33808250-33813569	5320	chr1:33807685-33808249=33813570-33813708:+	none	0.280551040896569	none	0.361264651412087	none	0.348703970235467	TRUE
klf12a	DreINT0086840	chr1:33813709-33820522	6814	chr1:33813570-33813708=33820523-33820680:+	none	0.303918558497926	none	0.353843804599846	none	0.480445206030017	TRUE
klf12a	DreINT0086841	chr1:33820681-33822833	2153	chr1:33820523-33820680=33822834-33824155:+	none	0.921309623007377	none	0.928421664346927	none	0.925008506373531	TRUE
pcdh7a	DreINT0110949	chr1:14454900-14455467	568	chr1:14451752-14454899=14455468-14456184:+	none	0.986049316672279	none	0.976038275188712	none	0.947526014987397	TRUE
pcdh7a	DreINT0110950	chr1:14456185-14511081	54897	chr1:14455468-14456184=14511082-14511280:+	none	0.00807973302769329	none	0.0205711659289543	none	0.072462945387883	TRUE
pcdh7a	DreINT0110951	chr1:14511281-14513750	2470	chr1:14511082-14511280=14513751-14516704:+	none	0.992686536950084	none	0.994034793408832	none	0.988036872802932	TRUE
uncx4.1	DreINT0171910	chr1:8606413-8607093	681	chr1:8605992-8606412=8607094-8607269:+	IR_IN_BUD13_KD_F2NEW	0.496067751722083	IR_IN_RBMX2_KD	0.537219136549728	none	0.40285459742093	FALSE
uncx4.1	DreINT0171911	chr1:8607270-8608699	1430	chr1:8607094-8607269=8608700-8610004:+	IR_IN_BUD13_KD_F2NEW	0.862090770091952	IR_IN_RBMX2_KD	0.876860196942516	IR_IN_SNIP1_KD	0.870354691044991	FALSE
raph1b	DreINT0124648	chr1:28860628-28883222	22595	chr1:28860405-28860627=28883223-28883282:+	NOT_RETAINED	0.161655124200754	NOT_RETAINED	0.212031211434535	NOT_RETAINED	0.268698571815721	FALSE
raph1b	DreINT0124654	chr1:28883283-28911926	28644	chr1:28883223-28883282=28911927-28912048:+	none	0.0687006121194312	none	0.112146984198718	none	0.195829969768251	FALSE
raph1b	DreINT0124655	chr1:28912049-28912915	867	chr1:28911927-28912048=28912916-28913018:+	NOT_RETAINED	0.256773918857055	NOT_RETAINED	0.293353630262531	NOT_RETAINED	0.419360497819904	FALSE
raph1b	DreINT0124656	chr1:28913019-28914813	1795	chr1:28912916-28913018=28914814-28915373:+	none	0.390287909184218	none	0.480942466871548	none	0.427259276672027	FALSE
raph1b	DreINT0124657	chr1:28915374-28924580	9207	chr1:28914814-28915373=28924581-28924658:+	none	0.241865102410351	none	0.358106936634289	none	0.382233934135305	TRUE
raph1b	DreINT0124658	chr1:28924659-28927958	3300	chr1:28924581-28924658=28927959-28928118:+	none	0.400236291978943	none	0.450203288044828	none	0.407065081053575	FALSE
raph1b	DreINT0124659	chr1:28928119-28928206	88	chr1:28927959-28928118=28928207-28928328:+	none	0.683527617135862	none	0.661437530510112	none	0.712931020878809	FALSE
raph1b	DreINT0124660	chr1:28928329-28930314	1986	chr1:28928207-28928328=28930315-28930380:+	none	0.357310957733339	none	0.360502858497314	none	0.444774066280282	FALSE
raph1b	DreINT0124661	chr1:28930381-28931444	1064	chr1:28930315-28930380=28931445-28931588:+	none	0.331471690251938	none	0.373523151755971	none	0.387919149452874	FALSE
raph1b	DreINT0124649	chr1:28931589-28932220	632	chr1:28931445-28931588=28932221-28932331:+	none	0.511840933075785	none	0.525562330214752	none	0.484214626213548	FALSE
raph1b	DreINT0124650	chr1:28932332-28933963	1632	chr1:28932221-28932331=28933964-28934062:+	none	0.490392248352078	none	0.552027169418847	none	0.559250982373002	FALSE
raph1b	DreINT0124651	chr1:28934063-28934198	136	chr1:28933964-28934062=28934199-28934319:+	none	0.521790039192371	none	0.542892908414058	none	0.494827853470242	FALSE
raph1b	DreINT0124652	chr1:28934320-28934491	172	chr1:28934199-28934319=28934492-28934634:+	none	0.410361936149259	none	0.4336156184992	none	0.451582083754875	FALSE
raph1b	DreINT0124653	chr1:28934635-28935687	1053	chr1:28934492-28934634=28935688-28939709:+	none	0.969537594568968	none	0.976141783891331	none	0.954677816147965	FALSE
mbnl2	DreINT0093798	chr1:1981838-2037707	55870	chr1:1981381-1981837=2037708-2037872:+	none	0.00985590131347822	none	0.0204198347245768	none	0.063794694784605	FALSE
mbnl2	DreINT0093799	chr1:2037873-2038341	469	chr1:2037708-2037872=2038342-2038542:+	none	0.713717685390848	none	0.698149644916375	none	0.654757983544549	FALSE
mbnl2	DreINT0093800	chr1:2038543-2042907	4365	chr1:2038342-2038542=2042908-2043162:+	none	0.31136763785601	none	0.422475241807488	none	0.344103408576897	FALSE
mbnl2	DreINT0093801	chr1:2043163-2053269	10107	chr1:2042908-2043162=2053270-2053323:+	none	0.31383176339747	none	0.424847181728809	none	0.422626010876946	FALSE
mbnl2	DreINT0093802	chr1:2053324-2053665	342	chr1:2053270-2053323=2053666-2053822:+	none	0.57573574061852	none	0.628856916086541	none	0.543482977488456	FALSE
mbnl2	DreINT0093803	chr1:2053823-2057872	4050	chr1:2053666-2053822=2057873-2057967:+	none	0.360678076342308	IR_IN_RBMX2_KD	0.428031714737982	none	0.471336057658513	FALSE
mbnl2	DreINT0093804	chr1:2057968-2066386	8419	chr1:2057873-2057967=2066387-2070067:+	none	0.830110699241837	none	0.842749359400526	IR_IN_SNIP1_KD	0.888831579073693	FALSE
si:ch73-236c18.8	DreINT0141276	chr1:57761809-57761970	162	chr1:57761971-57762062=57761696-57761808:-	none	0.570815304385009	none	0.589966892985324	none	0.628042239644469	TRUE
si:ch73-236c18.8	DreINT0141277	chr1:57759664-57759738	75	chr1:57759739-57759875=57759571-57759663:-	none	0.513334784157081	none	0.475772167371927	none	0.514430101366998	TRUE
ube2kb	DreINT0170651	chr1:22621396-22622057	662	chr1:22620878-22621395=22622058-22622151:+	none	0.580655554482322	none	0.535165703889772	none	0.575275938766358	FALSE
ube2kb	DreINT0170652	chr1:22622152-22622246	95	chr1:22622058-22622151=22622247-22622305:+	none	0.445898645488733	none	0.409570938493498	none	0.484428636438862	FALSE
ube2kb	DreINT0170653	chr1:22622306-22624859	2554	chr1:22622247-22622305=22624860-22624942:+	none	0.392254335472734	none	0.395648261490327	none	0.392941679398429	FALSE
ube2kb	DreINT0170654	chr1:22624943-22625357	415	chr1:22624860-22624942=22625358-22625457:+	none	0.357958573312403	none	0.404423955430362	none	0.40438519732317	TRUE
ube2kb	DreINT0170655	chr1:22625458-22627153	1696	chr1:22625358-22625457=22627154-22627282:+	none	0.353563309515031	none	0.367024033783544	none	0.444937766641202	FALSE
ube2kb	DreINT0170656	chr1:22627283-22630540	3258	chr1:22627154-22627282=22630541-22632230:+	none	0.801590368247492	none	0.810673557479245	none	0.831105212510735	FALSE
tmx2b	DreINT0165514	chr1:43879178-43880367	1190	chr1:43880368-43880634=43879117-43879177:-	none	0.50423818847469	none	0.474629338274136	none	0.414166362081898	FALSE
tmx2b	DreINT0165515	chr1:43878549-43879116	568	chr1:43879117-43879177=43878435-43878548:-	none	0.320788347891387	none	0.346014457329797	none	0.347543190195829	FALSE
tmx2b	DreINT0165516	chr1:43876848-43878434	1587	chr1:43878435-43878548=43876771-43876847:-	none	0.419545825510144	none	0.401594078370644	none	0.435243765909329	FALSE
tmx2b	DreINT0165517	chr1:43874981-43876770	1790	chr1:43876771-43876847=43874874-43874980:-	none	0.354279563399695	none	0.421742988657396	none	0.323221316843899	FALSE
tmx2b	DreINT0165518	chr1:43874362-43874873	512	chr1:43874874-43874980=43874296-43874361:-	none	0.1776484172534	none	0.190980168319721	none	0.284520697463361	FALSE
tmx2b	DreINT0165519	chr1:43874206-43874295	90	chr1:43874296-43874361=43874076-43874205:-	none	0.522716119519605	none	0.519272639540766	none	0.460821901901749	FALSE
tmx2b	DreINT0165520	chr1:43870604-43874075	3472	chr1:43874076-43874205=43867979-43870603:-	none	0.975355086506388	none	0.977628801145217	none	0.975181258306686	FALSE
si:ch211-161c21.2	DreINT0136634	chr1:17541857-17544706	2850	chr1:17544707-17544734=17541737-17541856:-	none	0.710079633561158	none	0.695596734538088	none	0.639615239591656	TRUE
si:ch211-161c21.2	DreINT0136635	chr1:17541514-17541736	223	chr1:17541737-17541856=17541396-17541513:-	none	0.473154134660854	none	0.461873970052163	none	0.630251570724984	TRUE
si:ch211-161c21.2	DreINT0136636	chr1:17494931-17541395	46465	chr1:17541396-17541513=17494675-17494930:-	none	0.0532438358589069	none	0.089311480814999	none	0.283333354049827	TRUE
si:ch211-239f4.6	DreINT0138801	chr1:44443598-44445431	1834	chr1:44445432-44445531=44443535-44443597:-	none	0.686406353206138	none	0.620351199281504	none	0.594437281808498	TRUE
si:ch211-239f4.6	DreINT0138802	chr1:44443234-44443534	301	chr1:44443535-44443597=44443198-44443233:-	none	0.306997792832468	none	0.35844914694459	none	0.381471046785215	TRUE
si:ch211-239f4.6	DreINT0138803	chr1:44442456-44443197	742	chr1:44443198-44443233=44441572-44442455:-	none	0.878436675929416	none	0.862099657105117	none	0.781392726778414	TRUE
itga6b	DreINT0083054	chr1:30215484-30230287	14804	chr1:30215234-30215483=30230288-30230415:+	none	0.345531602384893	none	0.355104991682657	none	0.384096657905032	FALSE
itga6b	DreINT0083065	chr1:30230416-30230491	76	chr1:30230288-30230415=30230492-30230571:+	none	0.475936515191182	none	0.435471516259384	none	0.469580064064298	FALSE
itga6b	DreINT0083071	chr1:30230572-30232584	2013	chr1:30230492-30230571=30232585-30232846:+	none	0.45084950845022	none	0.523462936957243	none	0.412877676307447	FALSE
itga6b	DreINT0083072	chr1:30232847-30234435	1589	chr1:30232585-30232846=30234436-30234567:+	none	0.524452048957799	none	0.576725709141687	none	0.556524921582298	FALSE
itga6b	DreINT0083073	chr1:30234568-30237381	2814	chr1:30234436-30234567=30237382-30237595:+	none	0.411964184248312	none	0.435787438068652	none	0.464644848674141	FALSE
itga6b	DreINT0083074	chr1:30237596-30238118	523	chr1:30237382-30237595=30238119-30238312:+	none	0.0855503829147662	none	0.110352413647318	none	0.144691271462148	FALSE
itga6b	DreINT0083075	chr1:30238313-30238445	133	chr1:30238119-30238312=30238446-30238534:+	none	0.389457692950802	none	0.381425543132054	none	0.350207269562139	FALSE
itga6b	DreINT0083076	chr1:30238535-30238622	88	chr1:30238446-30238534=30238623-30238750:+	none	0.446662766184939	none	0.422935608480638	none	0.50135921323731	FALSE
itga6b	DreINT0083077	chr1:30238751-30239292	542	chr1:30238623-30238750=30239293-30239388:+	none	0.285171615158193	none	0.327402714509921	none	0.298387125032701	FALSE
itga6b	DreINT0083055	chr1:30239389-30239471	83	chr1:30239293-30239388=30239472-30239533:+	none	0.529499993098524	none	0.468281695981883	none	0.466365386446784	FALSE
itga6b	DreINT0083056	chr1:30239534-30239635	102	chr1:30239472-30239533=30239636-30239799:+	none	0.62296126183712	none	0.604925889138588	none	0.56458856095164	FALSE
itga6b	DreINT0083057	chr1:30239800-30246810	7011	chr1:30239636-30239799=30246811-30246957:+	none	0.345879487574933	none	0.417735915521326	none	0.38220655382812	FALSE
itga6b	DreINT0083058	chr1:30246958-30248390	1433	chr1:30246811-30246957=30248391-30248506:+	NOT_RETAINED	0.256591281448038	NOT_RETAINED	0.274911710448708	NOT_RETAINED	0.318686237929247	FALSE
itga6b	DreINT0083059	chr1:30248507-30249042	536	chr1:30248391-30248506=30249043-30249196:+	none	0.490517340473853	none	0.491258442711375	none	0.488801409476914	TRUE
itga6b	DreINT0083060	chr1:30249197-30249573	377	chr1:30249043-30249196=30249574-30249657:+	none	0.423513834313824	none	0.436994195445114	none	0.431925753983183	FALSE
itga6b	DreINT0083061	chr1:30249658-30250478	821	chr1:30249574-30249657=30250479-30250558:+	none	0.332872976791188	none	0.37361033676744	none	0.392504220518333	FALSE
itga6b	DreINT0083062	chr1:30250559-30250775	217	chr1:30250479-30250558=30250776-30250853:+	none	0.331275168488405	none	0.362981078729879	none	0.29111616245509	FALSE
itga6b	DreINT0083063	chr1:30250854-30250942	89	chr1:30250776-30250853=30250943-30251045:+	none	0.401385868875282	none	0.410700858479188	none	0.462650697257242	FALSE
itga6b	DreINT0083064	chr1:30251046-30253019	1974	chr1:30250943-30251045=30253020-30253193:+	none	0.517960633399175	none	0.469766852644921	none	0.560013416765704	FALSE
itga6b	DreINT0083066	chr1:30253194-30253313	120	chr1:30253020-30253193=30253314-30253412:+	none	0.581145946987788	none	0.539626064129497	none	0.588810662886105	FALSE
itga6b	DreINT0083067	chr1:30253413-30256045	2633	chr1:30253314-30253412=30256046-30256156:+	none	0.493865653965813	none	0.45383595712981	none	0.434168105421759	FALSE
itga6b	DreINT0083068	chr1:30256157-30257391	1235	chr1:30256046-30256156=30257392-30257490:+	none	0.483401385608435	none	0.484649004882568	none	0.504092438518561	FALSE
itga6b	DreINT0083069	chr1:30257491-30257613	123	chr1:30257392-30257490=30257614-30257739:+	none	0.378318479153229	none	0.415518231955184	none	0.371653098240113	FALSE
itga6b	DreINT0083070	chr1:30257740-30259691	1952	chr1:30257614-30257739=30259692-30260775:+	none	0.853695949858153	none	0.849163149226991	none	0.94926330030135	FALSE
cryaa	DreINT0052328	chr1:28293372-28293816	445	chr1:28293049-28293371=28293817-28293939:+	none	0.630679052780525	none	0.556846666846335	none	0.531437285393433	TRUE
cryaa	DreINT0052329	chr1:28293940-28296120	2181	chr1:28293817-28293939=28296121-28297091:+	none	0.857225949855275	none	0.871532189363339	none	0.83780749783321	TRUE
smox	DreINT0153351	chr1:41148192-41153128	4937	chr1:41147988-41148191=41153129-41153363:+	none	0.554227901661803	none	0.553500870822238	none	0.48481038036595	FALSE
smox	DreINT0153352	chr1:41153364-41155001	1638	chr1:41153129-41153363=41155002-41155228:+	none	0.174114300029235	none	0.229820781170937	none	0.243256414727399	FALSE
smox	DreINT0153353	chr1:41155229-41157464	2236	chr1:41155002-41155228=41157465-41157638:+	none	0.377449273775163	none	0.425911652695236	none	0.514397620216408	FALSE
smox	DreINT0153354	chr1:41157639-41158456	818	chr1:41157465-41157638=41158457-41159156:+	none	0.901681986664042	none	0.919902433160597	none	0.948537399907272	TRUE
smox	DreINT0153355	chr1:41159157-41161241	2085	chr1:41158457-41159156=41161242-41161402:+	none	0.474078924021545	none	0.512530384163213	none	0.485425334168104	FALSE
smox	DreINT0153356	chr1:41161403-41164303	2901	chr1:41161242-41161402=41164304-41164822:+	none	0.792764145860059	none	0.787839782306461	none	0.859967370697041	FALSE
USMG5	DreINT0022184	chr1:48789744-48790387	644	chr1:48790388-48790472=48789641-48789743:-	none	0.226377673252673	none	0.169856891907658	none	0.130502055114493	FALSE
USMG5	DreINT0022185	chr1:48788005-48789640	1636	chr1:48789641-48789743=48787909-48788004:-	none	0.209575573939186	none	0.182403058481165	none	0.13460139411686	FALSE
USMG5	DreINT0022186	chr1:48787817-48787908	92	chr1:48787909-48788004=48787717-48787816:-	none	0.481021444911482	none	0.352884029333683	none	0.480076612911117	FALSE
aftpha	DreINT0027520	chr1:54417806-54421299	3494	chr1:54417663-54417805=54421300-54422841:+	none	0.884785192827829	none	0.902262214414343	none	0.832294399862897	TRUE
aftpha	DreINT0027521	chr1:54422842-54423662	821	chr1:54421300-54422841=54423663-54423811:+	none	0.637192912798281	none	0.644787467634929	none	0.572617360382555	TRUE
aftpha	DreINT0027522	chr1:54423812-54425454	1643	chr1:54423663-54423811=54425455-54425581:+	none	0.460829166527772	none	0.569556358208637	none	0.571326712360523	FALSE
aftpha	DreINT0027523	chr1:54425582-54426357	776	chr1:54425455-54425581=54426358-54426414:+	none	0.175690924207319	none	0.21708183659927	none	0.310379201602591	FALSE
aftpha	DreINT0027524	chr1:54426415-54426657	243	chr1:54426358-54426414=54426658-54426780:+	none	0.589529281910476	IR_IN_RBMX2_KD	0.680988725511387	none	0.623285066735969	FALSE
aftpha	DreINT0027525	chr1:54426781-54428022	1242	chr1:54426658-54426780=54428023-54428083:+	none	0.555535192183491	none	0.588267771684257	none	0.601089899876272	TRUE
aftpha	DreINT0027526	chr1:54428084-54430364	2281	chr1:54428023-54428083=54430365-54430448:+	none	0.338161540087257	none	0.440322100966189	none	0.435627909203102	FALSE
aftpha	DreINT0027527	chr1:54430449-54430675	227	chr1:54430365-54430448=54430676-54430799:+	none	0.410582288357453	none	0.514896234282279	none	0.493240979948491	FALSE
aftpha	DreINT0027528	chr1:54430800-54431791	992	chr1:54430676-54430799=54431792-54432221:+	none	0.703748692130687	none	0.786797068702148	none	0.835880920945237	TRUE
si:ch211-152f2.3	DreINT0136387	chr1:56187279-56187366	88	chr1:56187039-56187278=56187367-56187621:+	none	0.688335961741457	none	0.593880554881317	none	0.618576263887411	TRUE
atp5j	DreINT0035398	chr1:618014-619362	1349	chr1:619363-619404=617837-618013:-	none	0.558065235656022	none	0.526335850828894	none	0.684046787408381	TRUE
atp5j	DreINT0035399	chr1:616133-617836	1704	chr1:617837-618013=615148-616132:-	none	0.515155254181043	none	0.609738575459938	none	0.637786606977013	TRUE
cdk2ap2	DreINT0044347	chr1:39297199-39297470	272	chr1:39297471-39297764=39297039-39297198:-	none	0.746961219334174	none	0.725952054975511	none	0.650974576439908	FALSE
cdk2ap2	DreINT0044348	chr1:39296605-39297038	434	chr1:39297039-39297198=39296513-39296604:-	none	0.738188694576634	none	0.781584646916742	none	0.775082718087208	FALSE
cdk2ap2	DreINT0044349	chr1:39294761-39296512	1752	chr1:39296513-39296604=39294640-39294760:-	none	0.253346861609234	none	0.274296216394687	none	0.332822569199718	TRUE
cdk2ap2	DreINT0044350	chr1:39292098-39294639	2542	chr1:39294640-39294760=39291817-39292097:-	none	0.585396111902179	none	0.677728879504161	none	0.689579467077643	FALSE
arl13b	DreINT0033194	chr1:32936279-32946833	10555	chr1:32935676-32936278=32946834-32946904:+	none	0.315848059774363	none	0.363802993389377	none	0.327958447533438	TRUE
arl13b	DreINT0033195	chr1:32946905-32947007	103	chr1:32946834-32946904=32947008-32947257:+	NOT_RETAINED	0.277541431772546	NOT_RETAINED	0.295671678334739	NOT_RETAINED	0.336522695697737	FALSE
arl13b	DreINT0033196	chr1:32947258-32950249	2992	chr1:32947008-32947257=32950250-32950355:+	none	0.479217528354352	none	0.508149583951052	none	0.544656683330492	FALSE
arl13b	DreINT0033197	chr1:32950356-32950533	178	chr1:32950250-32950355=32950534-32950736:+	none	0.531655898856061	none	0.553476725820234	none	0.59649125832343	FALSE
arl13b	DreINT0033198	chr1:32950737-32953893	3157	chr1:32950534-32950736=32953894-32954008:+	none	0.440038206227317	none	0.5016999307342	none	0.484254306005238	FALSE
arl13b	DreINT0033199	chr1:32954009-32954534	526	chr1:32953894-32954008=32954535-32954688:+	none	0.208533299327041	none	0.268102331999832	none	0.288931874457902	FALSE
arl13b	DreINT0033200	chr1:32954689-32954863	175	chr1:32954535-32954688=32954864-32954983:+	none	0.458196112666979	none	0.488487383504429	none	0.439861628370695	FALSE
arl13b	DreINT0033201	chr1:32954984-32958152	3169	chr1:32954864-32954983=32958153-32958221:+	none	0.435620806301251	none	0.500886593731459	none	0.646850796025178	FALSE
arl13b	DreINT0033202	chr1:32958222-32961110	2889	chr1:32958153-32958221=32961111-32962227:+	none	0.732506839388283	none	0.75369627764653	none	0.821657712232513	TRUE
hsf2bp	DreINT0079221	chr1:28334855-28335270	416	chr1:28335271-28335309=28334707-28334854:-	none	0.609534369033883	none	0.571050220167598	none	0.532645361592485	TRUE
hsf2bp	DreINT0079222	chr1:28334014-28334706	693	chr1:28334707-28334854=28333913-28334013:-	none	0.383036057571304	none	0.413121733651219	none	0.474597056529199	TRUE
hsf2bp	DreINT0079223	chr1:28333604-28333912	309	chr1:28333913-28334013=28333454-28333603:-	none	0.442996293020936	none	0.489693004390299	none	0.445779201612666	TRUE
hsf2bp	DreINT0079224	chr1:28315671-28333453	17783	chr1:28333454-28333603=28315529-28315670:-	none	0.178707945740877	none	0.222424499252221	none	0.349811879049687	TRUE
hsf2bp	DreINT0079225	chr1:28315420-28315528	109	chr1:28315529-28315670=28315302-28315419:-	none	0.466431170057799	none	0.450550658529116	none	0.547138019715132	TRUE
hsf2bp	DreINT0079226	chr1:28314569-28315301	733	chr1:28315302-28315419=28314465-28314568:-	none	0.48254293943456	none	0.493184764016259	none	0.539311294063216	TRUE
hsf2bp	DreINT0079227	chr1:28307619-28314464	6846	chr1:28314465-28314568=28307366-28307618:-	none	0.727917766450831	none	0.766531201858446	none	0.777858290235048	TRUE
micall2b	DreINT0096046	chr1:8799699-8801656	1958	chr1:8801657-8802103=8799650-8799698:-	none	0.659490157736135	none	0.634364810874412	none	0.658442892546507	TRUE
micall2b	DreINT0096054	chr1:8795030-8799649	4620	chr1:8799650-8799698=8794888-8795029:-	none	0.452398200453211	none	0.477096731331967	none	0.502783361189937	TRUE
micall2b	DreINT0096055	chr1:8793566-8794887	1322	chr1:8794888-8795029=8793417-8793565:-	none	0.321691718394038	none	0.389009087294745	none	0.436762120486767	TRUE
micall2b	DreINT0096056	chr1:8792157-8793416	1260	chr1:8793417-8793565=8792026-8792156:-	none	0.49580897859562	none	0.525369317350893	none	0.524855481435155	TRUE
micall2b	DreINT0096057	chr1:8791735-8792025	291	chr1:8792026-8792156=8791309-8791734:-	none	0.44383323856433	none	0.457974511039096	none	0.477835756272605	TRUE
micall2b	DreINT0096058	chr1:8790340-8791308	969	chr1:8791309-8791734=8790013-8790339:-	none	0.240469958196406	none	0.300307130866467	none	0.290247124765149	TRUE
micall2b	DreINT0096059	chr1:8788064-8790012	1949	chr1:8790013-8790339=8787897-8788063:-	none	0.620895527671583	none	0.646741938223763	none	0.584604011125932	TRUE
micall2b	DreINT0096060	chr1:8786242-8787896	1655	chr1:8787897-8788063=8786190-8786241:-	none	0.240291696926928	none	0.296368399267692	none	0.360945525230586	TRUE
micall2b	DreINT0096061	chr1:8785693-8786189	497	chr1:8786190-8786241=8785526-8785692:-	none	0.67176183403783	none	0.683242336765975	none	0.825019906798296	TRUE
micall2b	DreINT0096047	chr1:8783519-8785525	2007	chr1:8785526-8785692=8783460-8783518:-	none	0.255072345694379	none	0.329405952261328	none	0.322626626142352	TRUE
micall2b	DreINT0096048	chr1:8783173-8783459	287	chr1:8783460-8783518=8783055-8783172:-	none	0.495926476137323	none	0.538878339335486	none	0.566154134365092	TRUE
micall2b	DreINT0096049	chr1:8782037-8783054	1018	chr1:8783055-8783172=8781934-8782036:-	none	0.462077539444169	none	0.501626974628386	none	0.559188727165844	TRUE
micall2b	DreINT0096050	chr1:8781831-8781933	103	chr1:8781934-8782036=8781757-8781830:-	none	0.621812764481348	none	0.661527470406114	none	0.616131312972943	TRUE
micall2b	DreINT0096051	chr1:8780926-8781756	831	chr1:8781757-8781830=8780811-8780925:-	none	0.249425928671213	none	0.304134630836522	none	0.39896666033075	TRUE
micall2b	DreINT0096052	chr1:8780130-8780810	681	chr1:8780811-8780925=8780083-8780129:-	none	0.229732558591568	none	0.310564545908078	none	0.281539949582246	TRUE
micall2b	DreINT0096053	chr1:8776884-8780082	3199	chr1:8780083-8780129=8775649-8776883:-	none	0.88848509643751	none	0.898001639790457	none	0.886702451498208	TRUE
prkag3a	DreINT0119686	chr1:5474088-5475708	1621	chr1:5473807-5474087=5475709-5475745:+	none	0.53004061697475	none	0.533785983061073	none	0.52055051985974	TRUE
prkag3a	DreINT0119687	chr1:5475746-5475849	104	chr1:5475709-5475745=5475850-5475956:+	none	0.506162457003419	none	0.517113476225549	none	0.525617532654005	TRUE
prkag3a	DreINT0119688	chr1:5475957-5477326	1370	chr1:5475850-5475956=5477327-5477408:+	none	0.311056868971829	none	0.361360846001396	none	0.357870065522644	TRUE
prkag3a	DreINT0119689	chr1:5477409-5477491	83	chr1:5477327-5477408=5477492-5477550:+	none	0.671378139283322	none	0.658177159951795	none	0.711196497532665	TRUE
prkag3a	DreINT0119690	chr1:5477551-5478982	1432	chr1:5477492-5477550=5478983-5479028:+	none	0.620078612763686	none	0.675915375502054	none	0.636170674870009	TRUE
prkag3a	DreINT0119691	chr1:5479029-5479504	476	chr1:5478983-5479028=5479505-5479559:+	none	0.280668667780562	none	0.315444812848424	none	0.390087148607765	TRUE
prkag3a	DreINT0119692	chr1:5479560-5480905	1346	chr1:5479505-5479559=5480906-5481032:+	none	0.525488070338063	none	0.535749922179946	none	0.699141574028798	TRUE
prkag3a	DreINT0119693	chr1:5481033-5481612	580	chr1:5480906-5481032=5481613-5481778:+	none	0.669301562692819	none	0.679718393446015	none	0.600629361057473	TRUE
prkag3a	DreINT0119694	chr1:5481779-5484551	2773	chr1:5481613-5481778=5484552-5484740:+	none	0.510626499061847	none	0.580529307058575	none	0.671035817215229	TRUE
mmd2b	DreINT0096745	chr1:7228004-7228739	736	chr1:7228740-7228821=7227843-7228003:-	none	0.423481109802121	none	0.436236420302332	none	0.387106120184608	TRUE
mmd2b	DreINT0096746	chr1:7226703-7227842	1140	chr1:7227843-7228003=7226628-7226702:-	none	0.284971622148379	none	0.319178377242329	none	0.39980833436101	TRUE
mmd2b	DreINT0096747	chr1:7225711-7226627	917	chr1:7226628-7226702=7225609-7225710:-	none	0.338850225976741	none	0.4074284067534	none	0.362275466715637	TRUE
mmd2b	DreINT0096748	chr1:7224759-7225608	850	chr1:7225609-7225710=7224689-7224758:-	none	0.487159313746582	none	0.557965312177843	none	0.540121406433683	TRUE
mmd2b	DreINT0096749	chr1:7224375-7224688	314	chr1:7224689-7224758=7224171-7224374:-	none	0.680723800909278	none	0.678783989415806	none	0.710396944518422	TRUE
micu3a	DreINT0096085	chr1:15704397-15705830	1434	chr1:15704126-15704396=15705831-15705978:+	none	0.48370511042331	none	0.540314905478979	none	0.496994295081676	TRUE
micu3a	DreINT0096088	chr1:15705979-15713007	7029	chr1:15705831-15705978=15713008-15713039:+	none	0.314802078973135	none	0.392534926749315	none	0.477640417366806	TRUE
micu3a	DreINT0096089	chr1:15713040-15713190	151	chr1:15713008-15713039=15713191-15713269:+	none	0.372798633801058	none	0.413170115970476	none	0.444939675262725	TRUE
micu3a	DreINT0096090	chr1:15713270-15727483	14214	chr1:15713191-15713269=15727484-15727531:+	none	0.204719485296279	none	0.254649216061165	none	0.388437742139457	TRUE
micu3a	DreINT0096091	chr1:15727532-15729667	2136	chr1:15727484-15727531=15729668-15729750:+	none	0.475678586738898	none	0.548259433615916	none	0.542238657238949	TRUE
micu3a	DreINT0096092	chr1:15729751-15729840	90	chr1:15729668-15729750=15729841-15729912:+	none	0.50113209785171	none	0.45714069222899	none	0.565973813917158	TRUE
micu3a	DreINT0096093	chr1:15729913-15747903	17991	chr1:15729841-15729912=15747904-15747998:+	none	0.252987903826811	none	0.312599614445573	none	0.388944675959901	TRUE
micu3a	DreINT0096094	chr1:15747999-15750277	2279	chr1:15747904-15747998=15750278-15750449:+	none	0.319720124505469	none	0.350520826257132	none	0.435921619551655	TRUE
micu3a	DreINT0096095	chr1:15750450-15759859	9410	chr1:15750278-15750449=15759860-15759968:+	none	0.278316315482179	none	0.336967197382156	none	0.427148419838178	TRUE
micu3a	DreINT0096086	chr1:15759969-15760439	471	chr1:15759860-15759968=15760440-15760597:+	none	0.249713811866967	none	0.259437124087059	none	0.344930854641639	TRUE
micu3a	DreINT0096087	chr1:15760598-15761902	1305	chr1:15760440-15760597=15761903-15763564:+	none	0.831329559043992	none	0.825185894862541	none	0.875186039547045	TRUE
efnb2b	DreINT0061522	chr1:6966895-6976023	9129	chr1:6976024-6976437=6966605-6966894:-	none	0.453991521350165	none	0.508535817773141	none	0.482992879567546	TRUE
efnb2b	DreINT0061523	chr1:6953835-6966604	12770	chr1:6966605-6966894=6953742-6953834:-	none	0.188345537733751	none	0.23466461006449	none	0.31207253199096	TRUE
efnb2b	DreINT0061524	chr1:6953396-6953741	346	chr1:6953742-6953834=6953285-6953395:-	none	0.609470215188184	none	0.66228018598789	none	0.68641687628567	TRUE
efnb2b	DreINT0061525	chr1:6951481-6953284	1804	chr1:6953285-6953395=6951025-6951480:-	none	0.834953583463058	none	0.845975484210539	IR_IN_SNIP1_KD	0.838054097201575	FALSE
tmem132a	DreINT0164314	chr1:44291113-44292741	1629	chr1:44290904-44291112=44292742-44292885:+	none	0.664804166624099	none	0.67859450005188	none	0.592753843620467	TRUE
tmem132a	DreINT0164315	chr1:44292886-44292964	79	chr1:44292742-44292885=44292965-44292996:+	none	0.800863732129493	none	0.77560237816144	none	0.828536538733911	TRUE
ATP5J (3 of 3)	DreINT0001683	chr1:46295907-46297427	1521	chr1:46297428-46298418=46295843-46295906:-	none	0.634992574771098	none	0.608984390833372	none	0.532377472000841	TRUE
ATP5J (3 of 3)	DreINT0001684	chr1:46295729-46295842	114	chr1:46295843-46295906=46295593-46295728:-	none	0.743527375230583	none	0.741825566679173	none	0.798367474107419	TRUE
si:dkey-281i15.10	DreINT0145429	chr1:27655856-27670787	14932	chr1:27670788-27670884=27655244-27655855:-	none	0.91368766061967	none	0.913091024966091	none	0.908177770295241	TRUE
kif16ba	DreINT0086013	chr1:50615540-50617555	2016	chr1:50617556-50617621=50615480-50615539:-	none	0.458299097344162	none	0.507562725578682	none	0.539675807403001	TRUE
kif16ba	DreINT0086024	chr1:50615189-50615479	291	chr1:50615480-50615539=50615069-50615188:-	none	0.534279444126703	none	0.60754015631653	none	0.567742427860738	TRUE
kif16ba	DreINT0086026	chr1:50614977-50615068	92	chr1:50615069-50615188=50614925-50614976:-	none	0.436772348193753	none	0.452402373183673	none	0.52670878557838	TRUE
kif16ba	DreINT0086027	chr1:50614835-50614924	90	chr1:50614925-50614976=50614697-50614834:-	none	0.337400865511656	none	0.364982181240091	none	0.431093839154236	TRUE
kif16ba	DreINT0086028	chr1:50613060-50614696	1637	chr1:50614697-50614834=50612977-50613059:-	none	0.379593117611431	none	0.455086923414783	none	0.509593213205769	TRUE
kif16ba	DreINT0086029	chr1:50612398-50612976	579	chr1:50612977-50613059=50612309-50612397:-	none	0.389615942146916	none	0.484872024592015	none	0.433234558125543	TRUE
kif16ba	DreINT0086030	chr1:50606654-50612308	5655	chr1:50612309-50612397=50606600-50606653:-	none	0.394893592809469	none	0.464434813169544	none	0.519384095174255	TRUE
kif16ba	DreINT0086031	chr1:50604605-50606599	1995	chr1:50606600-50606653=50604403-50604604:-	none	0.528015223966519	none	0.609134911421113	none	0.470645159780714	TRUE
kif16ba	DreINT0086032	chr1:50603005-50604402	1398	chr1:50604403-50604604=50602784-50603004:-	none	0.495027681615164	none	0.538821101236803	none	0.574837850527967	TRUE
kif16ba	DreINT0086014	chr1:50601076-50602783	1708	chr1:50602784-50603004=50600688-50601075:-	none	0.454265352579941	none	0.545482293778321	none	0.500061624317198	TRUE
kif16ba	DreINT0086015	chr1:50599221-50600687	1467	chr1:50600688-50601075=50598972-50599220:-	none	0.299595454510018	none	0.389935989834686	none	0.394935441874398	TRUE
kif16ba	DreINT0086016	chr1:50598677-50598971	295	chr1:50598972-50599220=50598345-50598676:-	none	0.42059064077928	none	0.498324307113454	none	0.519816117224172	TRUE
kif16ba	DreINT0086018	chr1:50594557-50594941	385	chr1:50594942-50595091=50594451-50594556:-	none	0.569966101394182	none	0.598333068986704	none	0.653639740364079	TRUE
kif16ba	DreINT0086019	chr1:50592184-50594450	2267	chr1:50594451-50594556=50592136-50592183:-	none	0.348637915487663	none	0.421645980983951	none	0.441045309508656	TRUE
kif16ba	DreINT0086020	chr1:50590362-50592135	1774	chr1:50592136-50592183=50590317-50590361:-	none	0.32711717843951	none	0.378655612616739	none	0.474304997099133	TRUE
kif16ba	DreINT0086021	chr1:50590230-50590316	87	chr1:50590317-50590361=50590107-50590229:-	none	0.567711155622916	none	0.563755387142662	none	0.571870430736756	TRUE
kif16ba	DreINT0086022	chr1:50590032-50590106	75	chr1:50590107-50590229=50589942-50590031:-	none	0.747992138129575	none	0.747103767179126	none	0.75374340578697	TRUE
kif16ba	DreINT0086023	chr1:50588939-50589941	1003	chr1:50589942-50590031=50588855-50588938:-	none	0.196896450747314	none	0.270852866387079	none	0.224246152889486	TRUE
kif16ba	DreINT0086025	chr1:50588772-50588854	83	chr1:50588855-50588938=50585528-50588771:-	none	0.994021161158406	none	0.989217075580286	none	0.992410773221726	TRUE
si:dkey-79f11.10	DreINT0146825	chr1:7244869-7246437	1569	chr1:7246438-7246568=7244835-7244868:-	none	0.561674801956237	none	0.583216878365376	none	0.474011782839634	TRUE
si:dkey-79f11.10	DreINT0146826	chr1:7243938-7244834	897	chr1:7244835-7244868=7243733-7243937:-	none	0.485631525089851	none	0.49912410836408	none	0.559758081815933	TRUE
timm10	DreINT0163327	chr1:43689403-43692598	3196	chr1:43689167-43689402=43692599-43693196:+	none	0.860141712155099	none	0.825309077489328	none	0.818285622752036	FALSE
tmem144a	DreINT0164356	chr1:20628241-20628334	94	chr1:20628335-20628545=20628097-20628240:-	none	0.699309640459271	none	0.605697331230341	none	0.564419456482251	TRUE
tmem144a	DreINT0164359	chr1:20626698-20628096	1399	chr1:20628097-20628240=20626575-20626697:-	none	0.293666797789261	none	0.332471552201236	none	0.387909382354106	TRUE
tmem144a	DreINT0164360	chr1:20626448-20626574	127	chr1:20626575-20626697=20626348-20626447:-	none	0.505059614343345	none	0.479511299746072	none	0.59704235471523	TRUE
tmem144a	DreINT0164361	chr1:20625893-20626347	455	chr1:20626348-20626447=20625812-20625892:-	none	0.369922881093889	none	0.408073028868074	none	0.421281307715935	TRUE
tmem144a	DreINT0164362	chr1:20625267-20625811	545	chr1:20625812-20625892=20625188-20625266:-	none	0.328896375449243	none	0.346499818452059	none	0.441949876706161	TRUE
tmem144a	DreINT0164363	chr1:20624826-20625187	362	chr1:20625188-20625266=20624749-20624825:-	none	0.590074956152764	none	0.588575313053941	none	0.559241216912668	TRUE
tmem144a	DreINT0164364	chr1:20623808-20624748	941	chr1:20624749-20624825=20623689-20623807:-	none	0.32783616014407	none	0.386342617836488	none	0.390002110606933	TRUE
tmem144a	DreINT0164365	chr1:20623604-20623688	85	chr1:20623689-20623807=20623484-20623603:-	none	0.449892642440025	none	0.421666548139934	none	0.48543325649681	TRUE
tmem144a	DreINT0164366	chr1:20623389-20623483	95	chr1:20623484-20623603=20623291-20623388:-	none	0.66294387979155	none	0.691576978411534	none	0.673842465083708	TRUE
tmem144a	DreINT0164357	chr1:20622761-20623290	530	chr1:20623291-20623388=20622707-20622760:-	none	0.140572845603945	none	0.211608372976291	none	0.221990871452205	TRUE
tmem144a	DreINT0164358	chr1:20621161-20622706	1546	chr1:20622707-20622760=20620228-20621160:-	none	0.899111934270303	none	0.898222342418597	none	0.929091279649974	TRUE
si:dkey-222h21.10	DreINT0144315	chr1:57485718-57486060	343	chr1:57485690-57485717=57486061-57486175:+	none	0.746346905629202	none	0.749142313406537	none	0.619276887658169	TRUE
ADGRE5 (1 of 3)	DreINT0000520	chr1:57837736-57837922	187	chr1:57837923-57837964=57837604-57837735:-	none	0.414032366698169	none	0.414604047104974	none	0.468345036085432	TRUE
ADGRE5 (1 of 3)	DreINT0000524	chr1:57837498-57837603	106	chr1:57837604-57837735=57837442-57837497:-	none	0.608434209375736	none	0.610527248479115	none	0.622212437758036	TRUE
ADGRE5 (1 of 3)	DreINT0000525	chr1:57837146-57837441	296	chr1:57837442-57837497=57837056-57837145:-	none	0.27680521950307	none	0.309145337974631	none	0.421810638698841	TRUE
ADGRE5 (1 of 3)	DreINT0000526	chr1:57835634-57837055	1422	chr1:57837056-57837145=57835480-57835633:-	none	0.32162685959559	none	0.403648931284437	none	0.411483009345512	TRUE
ADGRE5 (1 of 3)	DreINT0000527	chr1:57835346-57835479	134	chr1:57835480-57835633=57835229-57835345:-	none	0.415618643425074	none	0.431778248179384	none	0.479160599535813	TRUE
ADGRE5 (1 of 3)	DreINT0000528	chr1:57835145-57835228	84	chr1:57835229-57835345=57834942-57835144:-	none	0.602826874650753	none	0.570809020466612	none	0.602212169469096	TRUE
ADGRE5 (1 of 3)	DreINT0000529	chr1:57834429-57834941	513	chr1:57834942-57835144=57834258-57834428:-	none	0.517939609476649	none	0.568787784053009	none	0.554375334777672	TRUE
ADGRE5 (1 of 3)	DreINT0000530	chr1:57834165-57834257	93	chr1:57834258-57834428=57833970-57834164:-	none	0.71843498267663	none	0.711501150700527	none	0.709393346063157	TRUE
ADGRE5 (1 of 3)	DreINT0000521	chr1:57830678-57833191	2514	chr1:57833192-57833409=57830519-57830677:-	none	0.392822216471678	none	0.468517027517629	none	0.501312652227483	TRUE
ADGRE5 (1 of 3)	DreINT0000522	chr1:57828946-57830275	1330	chr1:57830276-57830447=57828847-57828945:-	none	0.673758274248788	none	0.717568339253507	none	0.663658439479023	TRUE
ADGRE5 (1 of 3)	DreINT0000523	chr1:57828765-57828846	82	chr1:57828847-57828945=57828275-57828764:-	none	0.952683691525251	none	0.927512990838668	none	0.941617224107193	FALSE
tyrp1b	DreINT0170153	chr1:18639978-18642038	2061	chr1:18639900-18639977=18642039-18642394:+	none	0.270796784837892	none	0.297281546991308	none	0.165458301565228	TRUE
tyrp1b	DreINT0170154	chr1:18642395-18643666	1272	chr1:18642039-18642394=18643667-18643989:+	none	0.196283963301063	none	0.215248769352602	none	0.237305040165275	FALSE
tyrp1b	DreINT0170155	chr1:18643990-18645510	1521	chr1:18643667-18643989=18645511-18645715:+	none	0.152653109619975	none	0.196856747195355	none	0.169335536982679	FALSE
tyrp1b	DreINT0170156	chr1:18645716-18647947	2232	chr1:18645511-18645715=18647948-18648115:+	none	0.223002219105084	none	0.25683972425575	none	0.275475826968909	FALSE
tyrp1b	DreINT0170157	chr1:18648116-18648250	135	chr1:18647948-18648115=18648251-18648430:+	none	0.485626337788964	none	0.457158275591775	none	0.40565713748055	FALSE
tyrp1b	DreINT0170158	chr1:18648431-18648543	113	chr1:18648251-18648430=18648544-18648693:+	none	0.490109141504683	none	0.461557922213065	none	0.451128113623552	FALSE
tyrp1b	DreINT0170159	chr1:18648694-18652602	3909	chr1:18648544-18648693=18652603-18653111:+	none	0.570735891258133	none	0.596380687767204	none	0.63057082424368	FALSE
RAC1 (1 of 4)	DreINT0017649	chr1:56229303-56233489	4187	chr1:56233490-56233607=56228405-56229302:-	none	0.938271585313611	none	0.927885642346161	none	0.905530611398096	TRUE
prom1b	DreINT0120290	chr1:22055930-22065909	9980	chr1:22065910-22066406=22055868-22055929:-	none	0.547453852549808	none	0.584304458776145	none	0.585341385236717	TRUE
prom1b	DreINT0120301	chr1:22054806-22055867	1062	chr1:22055868-22055929=22054779-22054805:-	none	0.464660708430949	none	0.493701035033396	none	0.528169157511412	TRUE
prom1b	DreINT0120308	chr1:22052894-22054778	1885	chr1:22054779-22054805=22052688-22052893:-	none	0.324079635432041	none	0.386925964103274	none	0.328399638860386	TRUE
prom1b	DreINT0120309	chr1:22046349-22052687	6339	chr1:22052688-22052893=22046228-22046348:-	none	0.342182328724855	none	0.407075686207051	none	0.471468362254873	TRUE
prom1b	DreINT0120310	chr1:22045614-22046227	614	chr1:22046228-22046348=22045550-22045613:-	none	0.405265068857822	none	0.41889567805957	none	0.471384719796532	TRUE
prom1b	DreINT0120311	chr1:22045209-22045549	341	chr1:22045550-22045613=22045119-22045208:-	none	0.377731901560715	none	0.404780961550839	none	0.329657992016968	TRUE
prom1b	DreINT0120312	chr1:22043665-22045118	1454	chr1:22045119-22045208=22043447-22043664:-	none	0.567791360046612	none	0.610001174855514	none	0.499043224964016	TRUE
prom1b	DreINT0120313	chr1:22041203-22043446	2244	chr1:22043447-22043664=22041128-22041202:-	none	0.350963005324664	none	0.406036511081051	none	0.50527697810658	TRUE
prom1b	DreINT0120314	chr1:22041039-22041127	89	chr1:22041128-22041202=22040975-22041038:-	none	0.597890277962829	none	0.582041647728134	none	0.674982871083717	TRUE
prom1b	DreINT0120291	chr1:22040705-22040974	270	chr1:22040975-22041038=22040696-22040704:-	none	0.502427288505895	none	0.531775956574684	none	0.525135850946452	TRUE
prom1b	DreINT0120292	chr1:22039723-22040695	973	chr1:22040696-22040704=22039563-22039722:-	none	0.79080040744063	none	0.798615526701764	none	0.808736373548768	TRUE
prom1b	DreINT0120293	chr1:22038593-22039562	970	chr1:22039563-22039722=22038440-22038592:-	none	0.434014425679064	none	0.509677859622726	none	0.455206790224188	TRUE
prom1b	DreINT0120294	chr1:22038348-22038439	92	chr1:22038440-22038592=22038224-22038347:-	none	0.522373075179071	none	0.48831630042096	none	0.581079120912983	TRUE
prom1b	DreINT0120295	chr1:22036444-22038223	1780	chr1:22038224-22038347=22036340-22036443:-	none	0.470985318948488	none	0.515400255491342	none	0.503416486121611	TRUE
prom1b	DreINT0120296	chr1:22035923-22036339	417	chr1:22036340-22036443=22035838-22035922:-	none	0.526461412099562	none	0.533676144515163	none	0.592205312671007	TRUE
prom1b	DreINT0120297	chr1:22035752-22035837	86	chr1:22035838-22035922=22035605-22035751:-	none	0.712174551469183	none	0.686344837698373	none	0.690083592151146	TRUE
prom1b	DreINT0120298	chr1:22035511-22035604	94	chr1:22035605-22035751=22035439-22035510:-	none	0.679116583788619	none	0.629572897412842	none	0.642512617263084	TRUE
prom1b	DreINT0120299	chr1:22033085-22035438	2354	chr1:22035439-22035510=22032992-22033084:-	none	0.432525240359866	none	0.423445850484491	none	0.354820522271256	TRUE
prom1b	DreINT0120300	chr1:22030972-22032991	2020	chr1:22032992-22033084=22030918-22030971:-	none	0.473364160436095	none	0.521082837591686	none	0.530798900315653	TRUE
prom1b	DreINT0120302	chr1:22030798-22030917	120	chr1:22030918-22030971=22030717-22030797:-	none	0.460696387114043	none	0.486706059708458	none	0.479964924023768	TRUE
prom1b	DreINT0120303	chr1:22030318-22030716	399	chr1:22030717-22030797=22030249-22030317:-	none	0.552180376542333	none	0.55470299975765	none	0.629121316957358	TRUE
prom1b	DreINT0120304	chr1:22030142-22030248	107	chr1:22030249-22030317=22030052-22030141:-	none	0.517184415437994	none	0.546406245937741	none	0.467429685499756	TRUE
prom1b	DreINT0120305	chr1:22028147-22030051	1905	chr1:22030052-22030141=22028031-22028146:-	none	0.232987341825709	none	0.269808993393247	none	0.345517787938863	TRUE
prom1b	DreINT0120306	chr1:22023395-22028030	4636	chr1:22028031-22028146=22023358-22023394:-	none	0.270595893651654	none	0.357930867610667	none	0.426841354531483	TRUE
prom1b	DreINT0120307	chr1:22023259-22023357	99	chr1:22023358-22023394=22022192-22023258:-	none	0.949448286447789	none	0.917139912692276	none	0.943568123779977	TRUE
si:dkeyp-75b4.9	DreINT0148015	chr1:9304449-9304524	76	chr1:9304525-9304729=9304302-9304448:-	none	0.83090547241049	none	0.754030343684428	none	0.721702133248078	TRUE
si:dkeyp-75b4.9	DreINT0148016	chr1:9302939-9304301	1363	chr1:9304302-9304448=9302767-9302938:-	none	0.605677098593124	none	0.622692531050256	none	0.602025142044025	TRUE
si:dkeyp-75b4.9	DreINT0148017	chr1:9302665-9302766	102	chr1:9302767-9302938=9302564-9302664:-	none	0.617124335863797	none	0.585208253488994	none	0.727228990722495	TRUE
CT826376.2	DreINT0008294	chr1:13566822-13566933	112	chr1:13566664-13566821=13566934-13567066:+	none	0.716543867513219	none	0.637360121220519	none	0.581846302680801	TRUE
CT826376.2	DreINT0008295	chr1:13567067-13567178	112	chr1:13566934-13567066=13567179-13567265:+	none	0.46211711343795	none	0.445599438411014	none	0.473612695166945	TRUE
CT826376.2	DreINT0008296	chr1:13567266-13567374	109	chr1:13567179-13567265=13567375-13567613:+	none	0.826824078037005	none	0.799048026107904	none	0.850412772327396	TRUE
nt5c2b	DreINT0106863	chr1:31120998-31123930	2933	chr1:31123931-31124054=31120874-31120997:-	none	0.316851568003032	none	0.369998846987819	none	0.344822006955914	FALSE
nt5c2b	DreINT0106872	chr1:31114416-31120873	6458	chr1:31120874-31120997=31114342-31114415:-	none	0.296124916632716	none	0.2966655882786	none	0.388821817820056	FALSE
nt5c2b	DreINT0106873	chr1:31101845-31114341	12497	chr1:31114342-31114415=31101727-31101844:-	none	0.141093591453436	none	0.17779475807979	none	0.197622764687175	FALSE
nt5c2b	DreINT0106874	chr1:31101617-31101726	110	chr1:31101727-31101844=31101521-31101616:-	NOT_RETAINED	0.628699453017586	NOT_RETAINED	0.626504506282767	NOT_RETAINED	0.586897817180259	FALSE
nt5c2b	DreINT0106875	chr1:31101435-31101520	86	chr1:31101521-31101616=31101343-31101434:-	NOT_RETAINED	0.585027683121872	NOT_RETAINED	0.599923372758425	NOT_RETAINED	0.563611116209454	FALSE
nt5c2b	DreINT0106876	chr1:31098530-31101342	2813	chr1:31101343-31101434=31098472-31098529:-	NOT_RETAINED	0.251702732578864	NOT_RETAINED	0.267666162379858	NOT_RETAINED	0.388703631847661	FALSE
nt5c2b	DreINT0106877	chr1:31097808-31098471	664	chr1:31098472-31098529=31097714-31097807:-	none	0.458306650922797	none	0.469766536022902	none	0.488716667372252	TRUE
nt5c2b	DreINT0106878	chr1:31091109-31097713	6605	chr1:31097714-31097807=31091055-31091108:-	none	0.202056860446994	none	0.240062100010652	none	0.285204581660635	FALSE
nt5c2b	DreINT0106879	chr1:31090972-31091054	83	chr1:31091055-31091108=31090888-31090971:-	none	0.41044302697492	none	0.372033894495745	none	0.363767555311558	FALSE
nt5c2b	DreINT0106864	chr1:31088812-31090887	2076	chr1:31090888-31090971=31088770-31088811:-	none	0.357565350815265	none	0.351279180141649	none	0.416967640831737	FALSE
nt5c2b	DreINT0106865	chr1:31088686-31088769	84	chr1:31088770-31088811=31088578-31088685:-	none	0.26928047658332	none	0.270102868175071	none	0.265694425768765	FALSE
nt5c2b	DreINT0106866	chr1:31086281-31088577	2297	chr1:31088578-31088685=31086214-31086280:-	none	0.419764071363388	none	0.473878961839001	none	0.43687256492715	FALSE
nt5c2b	DreINT0106867	chr1:31085789-31086213	425	chr1:31086214-31086280=31085618-31085788:-	none	0.496094807940452	none	0.516110815333048	none	0.446433874657412	FALSE
nt5c2b	DreINT0106868	chr1:31085039-31085617	579	chr1:31085618-31085788=31084987-31085038:-	none	0.500961084130383	none	0.48922486255396	none	0.466417110499257	FALSE
nt5c2b	DreINT0106869	chr1:31082263-31084986	2724	chr1:31084987-31085038=31082202-31082262:-	none	0.17393638963256	none	0.187978856305974	none	0.232204301147453	FALSE
nt5c2b	DreINT0106870	chr1:31080820-31082201	1382	chr1:31082202-31082262=31080643-31080819:-	none	0.284833772078176	none	0.306362466869567	none	0.321709566991711	FALSE
nt5c2b	DreINT0106871	chr1:31077003-31080642	3640	chr1:31080643-31080819=31076617-31077002:-	none	0.67122014845214	none	0.701945265714582	none	0.743027544103986	FALSE
c3a.5	DreINT0038977	chr1:55452849-55452972	124	chr1:55452973-55453189=55452680-55452848:-	none	0.68541209066674	none	0.631989645763096	none	0.608682249485228	TRUE
c3a.5	DreINT0038986	chr1:55452193-55452679	487	chr1:55452680-55452848=55452119-55452192:-	none	0.623192721641687	none	0.635656989047169	none	0.655731437565913	TRUE
c3a.5	DreINT0038987	chr1:55452021-55452118	98	chr1:55452119-55452192=55451932-55452020:-	none	0.565545176735502	none	0.561945492761008	none	0.558115846519722	TRUE
c3a.5	DreINT0038988	chr1:55451740-55451931	192	chr1:55451932-55452020=55451657-55451739:-	none	0.389245467580214	none	0.454511729205834	none	0.487046579753045	TRUE
c3a.5	DreINT0038989	chr1:55451577-55451656	80	chr1:55451657-55451739=55451489-55451576:-	none	0.61828548433308	none	0.623779823710135	none	0.603617020193229	TRUE
c3a.5	DreINT0038990	chr1:55450164-55451488	1325	chr1:55451489-55451576=55450061-55450163:-	none	0.439156122056762	none	0.471902757842041	none	0.649232169443609	TRUE
c3a.5	DreINT0038991	chr1:55449671-55450060	390	chr1:55450061-55450163=55449550-55449670:-	none	0.156700413442201	none	0.187873450128859	none	0.219231794228534	TRUE
c3a.5	DreINT0038992	chr1:55449421-55449549	129	chr1:55449550-55449670=55449305-55449420:-	none	0.484987188399057	none	0.543400856915751	none	0.53360819708348	TRUE
c3a.5	DreINT0038993	chr1:55449223-55449304	82	chr1:55449305-55449420=55449076-55449222:-	none	0.699630287939895	none	0.681245094042932	none	0.738310780613906	TRUE
c3a.5	DreINT0038978	chr1:55448141-55449075	935	chr1:55449076-55449222=55447940-55448140:-	none	0.508912683221576	none	0.552843726706172	none	0.539505797057382	TRUE
c3a.5	DreINT0038979	chr1:55445530-55447939	2410	chr1:55447940-55448140=55445338-55445529:-	none	0.342042525729144	none	0.361553726071216	none	0.450974179026064	TRUE
c3a.5	DreINT0038980	chr1:55443925-55445337	1413	chr1:55445338-55445529=55443772-55443924:-	none	0.467641861138808	none	0.519913145522155	none	0.513553260139599	TRUE
c3a.5	DreINT0038981	chr1:55442879-55443771	893	chr1:55443772-55443924=55442749-55442878:-	none	0.479242930534315	none	0.580016647768787	none	0.548381993735362	TRUE
c3a.5	DreINT0038982	chr1:55441068-55442748	1681	chr1:55442749-55442878=55440867-55441067:-	none	0.588799009345548	none	0.642728465793118	none	0.619777138506721	TRUE
c3a.5	DreINT0038983	chr1:55438848-55440866	2019	chr1:55440867-55441067=55438721-55438847:-	none	0.450185555955629	none	0.534591256420075	none	0.544839719023314	TRUE
c3a.5	DreINT0038984	chr1:55438540-55438720	181	chr1:55438721-55438847=55438448-55438539:-	none	0.420852277217855	none	0.432399107275128	none	0.568498646064535	TRUE
c3a.5	DreINT0038985	chr1:55438366-55438447	82	chr1:55438448-55438539=55438226-55438365:-	none	0.720817843940749	none	0.693590968272535	none	0.82084647222012	TRUE
zgc:66472	DreINT0180504	chr1:43299628-43299700	73	chr1:43299701-43299847=43299576-43299627:-	none	0.673532488274844	none	0.61987727106821	none	0.562915140594435	FALSE
zgc:66472	DreINT0180505	chr1:43297408-43299575	2168	chr1:43299576-43299627=43297018-43297407:-	none	0.465300100235549	none	0.522594679913712	none	0.536312040511231	FALSE
zgc:66472	DreINT0180506	chr1:43296549-43297017	469	chr1:43297018-43297407=43296461-43296548:-	none	0.434780194608032	none	0.492450853629018	none	0.484596071106298	FALSE
zgc:66472	DreINT0180507	chr1:43293798-43296460	2663	chr1:43296461-43296548=43292709-43293797:-	IR_IN_BUD13_KD_F2NEW	0.779284435810727	IR_IN_RBMX2_KD	0.808393354559035	IR_IN_SNIP1_KD	0.782943212239219	FALSE
zgc:66472	DreINT0180508	chr1:43292609-43292708	100	chr1:43292709-43293797=43292541-43292608:-	none	0.912450908187225	none	0.766783035517923	none	0.85818641706909	FALSE
zgc:66472	DreINT0180509	chr1:43292461-43292540	80	chr1:43292541-43292608=43292417-43292460:-	none	0.503533426895127	none	0.478302373206209	none	0.518024254767066	FALSE
zgc:66472	DreINT0180510	chr1:43288418-43292416	3999	chr1:43292417-43292460=43287551-43288417:-	IR_IN_BUD13_KD_F2NEW	0.895071272808633	IR_IN_RBMX2_KD	0.892757998802631	IR_IN_SNIP1_KD	0.911866170554355	FALSE
CR385050.1	DreINT0007719	chr1:43286357-43286424	68	chr1:43286425-43286709=43286015-43286356:-	none	0.884195584494233	none	0.773440890334072	none	0.740303840743151	TRUE
CR385050.1	DreINT0007720	chr1:43285524-43286014	491	chr1:43286015-43286356=43285482-43285523:-	none	0.337797594096771	none	0.372235429157488	none	0.371145379587602	TRUE
CR385050.1	DreINT0007721	chr1:43285351-43285481	131	chr1:43285482-43285523=43284253-43285350:-	none	0.963620480639143	none	0.954345494670914	none	0.955053921236293	TRUE
smc2	DreINT0153031	chr1:18845625-18846357	733	chr1:18845362-18845624=18846358-18846507:+	none	0.591932834524597	none	0.556427445409666	none	0.450308876063119	FALSE
smc2	DreINT0153042	chr1:18846508-18846598	91	chr1:18846358-18846507=18846599-18846721:+	none	0.688746123888168	none	0.653228689766536	none	0.648042560353484	FALSE
smc2	DreINT0153047	chr1:18846722-18847462	741	chr1:18846599-18846721=18847463-18847501:+	none	0.246038785679382	none	0.290481719758798	none	0.285649648337017	FALSE
smc2	DreINT0153048	chr1:18847502-18847605	104	chr1:18847463-18847501=18847606-18847716:+	none	0.258432112817192	none	0.247239920234509	none	0.301029996882375	FALSE
smc2	DreINT0153049	chr1:18847717-18847801	85	chr1:18847606-18847716=18847802-18847846:+	none	0.419540395946858	none	0.40644936096143	none	0.389943717811435	FALSE
smc2	DreINT0153050	chr1:18847847-18848434	588	chr1:18847802-18847846=18848435-18848668:+	none	0.257607216769656	none	0.287340386883819	none	0.25597206328411	FALSE
smc2	DreINT0153051	chr1:18848669-18851524	2856	chr1:18848435-18848668=18851525-18851674:+	none	0.229601045562378	none	0.296382256916225	none	0.314386746844097	FALSE
smc2	DreINT0153052	chr1:18851675-18852956	1282	chr1:18851525-18851674=18852957-18853190:+	none	0.251637497048333	none	0.333626072923065	none	0.269590867401161	FALSE
smc2	DreINT0153053	chr1:18853191-18855153	1963	chr1:18852957-18853190=18855154-18855313:+	none	0.224024669452897	none	0.307309323835222	none	0.34272407468218	FALSE
smc2	DreINT0153032	chr1:18855314-18855682	369	chr1:18855154-18855313=18855683-18855800:+	none	0.214236528722388	none	0.190588600014675	none	0.261445112944308	FALSE
smc2	DreINT0153033	chr1:18855801-18855906	106	chr1:18855683-18855800=18855907-18856045:+	none	0.554057142626996	none	0.530926754370335	none	0.5108342747908	FALSE
smc2	DreINT0153034	chr1:18856046-18856895	850	chr1:18855907-18856045=18856896-18857015:+	none	0.187884554798198	none	0.225050296691681	none	0.269640936267796	FALSE
smc2	DreINT0153035	chr1:18857016-18857108	93	chr1:18856896-18857015=18857109-18857313:+	none	0.434808959166673	none	0.392684946008387	none	0.469491070257941	FALSE
smc2	DreINT0153036	chr1:18857314-18857651	338	chr1:18857109-18857313=18857652-18857787:+	none	0.261479221809334	none	0.275500993321457	none	0.307436257153904	FALSE
smc2	DreINT0153037	chr1:18857788-18857872	85	chr1:18857652-18857787=18857873-18857997:+	none	0.454208215104824	none	0.439270236102848	none	0.467541559613599	FALSE
smc2	DreINT0153038	chr1:18857998-18858107	110	chr1:18857873-18857997=18858108-18858301:+	NOT_RETAINED	0.556043323827372	NOT_RETAINED	0.549934630765538	NOT_RETAINED	0.514279346435417	FALSE
smc2	DreINT0153039	chr1:18858302-18860419	2118	chr1:18858108-18858301=18860420-18860563:+	none	0.389473867357359	none	0.414237306950133	none	0.402277528573364	FALSE
smc2	DreINT0153040	chr1:18860564-18860675	112	chr1:18860420-18860563=18860676-18860870:+	none	0.501392722357837	none	0.501576013642828	none	0.483277268893126	FALSE
smc2	DreINT0153041	chr1:18860871-18861288	418	chr1:18860676-18860870=18861289-18861489:+	none	0.371133165413029	none	0.406367276097988	none	0.432941498129156	FALSE
smc2	DreINT0153043	chr1:18861490-18864437	2948	chr1:18861289-18861489=18864438-18864554:+	none	0.304356774175945	none	0.335345368435072	none	0.421037942680265	FALSE
smc2	DreINT0153044	chr1:18864555-18864655	101	chr1:18864438-18864554=18864656-18864816:+	none	0.611644923478251	none	0.577359346160099	none	0.480785142619065	FALSE
smc2	DreINT0153045	chr1:18864817-18865003	187	chr1:18864656-18864816=18865004-18865151:+	none	0.485336176488617	none	0.51972378160797	none	0.59207368822709	FALSE
smc2	DreINT0153046	chr1:18865152-18868303	3152	chr1:18865004-18865151=18868304-18868864:+	none	0.785158442096953	none	0.780287707938304	none	0.805220771671925	FALSE
SLC9A3R2 (1 of 2)	DreINT0019705	chr1:53480341-53483291	2951	chr1:53480218-53480340=53483292-53483408:+	none	0.314825003280776	none	0.417683354426189	none	0.442683159958683	TRUE
SLC9A3R2 (1 of 2)	DreINT0019706	chr1:53483409-53487790	4382	chr1:53483292-53483408=53487791-53487853:+	none	0.43339989179237	none	0.495056060032384	none	0.662103807514244	TRUE
SLC9A3R2 (1 of 2)	DreINT0019707	chr1:53487854-53494825	6972	chr1:53487791-53487853=53494826-53495008:+	none	0.174158378196061	none	0.22111014307683	none	0.473856421589069	TRUE
SLC9A3R2 (1 of 2)	DreINT0019708	chr1:53495009-53498123	3115	chr1:53494826-53495008=53498124-53498313:+	none	0.359699273870763	none	0.42743684649853	none	0.401494380413101	TRUE
SLC9A3R2 (1 of 2)	DreINT0019709	chr1:53498314-53500941	2628	chr1:53498124-53498313=53500942-53500974:+	none	0.640882307490686	none	0.680350721207194	none	0.626626236411854	TRUE
SLC9A3R2 (1 of 2)	DreINT0019710	chr1:53500975-53502292	1318	chr1:53500942-53500974=53502293-53502501:+	none	0.274438932645941	none	0.40104010454246	none	0.501036965162477	TRUE
f7	DreINT0065688	chr1:120037-120112	76	chr1:119960-120036=120113-120276:+	none	0.842682775718889	none	0.825552621304801	none	0.730392792021264	TRUE
f7	DreINT0065689	chr1:120277-120863	587	chr1:120113-120276=120864-120888:+	none	0.359055092537898	none	0.391163711941708	none	0.523622342110734	TRUE
f7	DreINT0065690	chr1:120889-120961	73	chr1:120864-120888=120962-121078:+	none	0.765598344826844	none	0.796551141473757	none	0.712324352677689	TRUE
f7	DreINT0065691	chr1:121079-121701	623	chr1:120962-121078=121702-121842:+	none	0.50933565828278	none	0.616372311167729	none	0.54559176186167	TRUE
f7	DreINT0065692	chr1:121843-122110	268	chr1:121702-121842=122111-122232:+	none	0.403654044241702	none	0.501157487020697	none	0.517245461568367	TRUE
f7	DreINT0065693	chr1:122233-122328	96	chr1:122111-122232=122329-122449:+	none	0.776877907199356	none	0.802029882946308	none	0.81298016239104	TRUE
f7	DreINT0065694	chr1:122450-124204	1755	chr1:122329-122449=124205-125246:+	none	0.917328364282882	none	0.941686223145093	none	0.925277132734513	TRUE
PTGDR2	DreINT0017417	chr1:43395154-43395249	96	chr1:43394423-43395153=43395250-43395595:+	none	0.993823409652364	none	0.982245526564169	none	0.984301961863265	TRUE
paip2b	DreINT0109764	chr1:40763083-40764180	1098	chr1:40762984-40763082=40764181-40764338:+	none	0.396660612491062	none	0.420121213204415	none	0.28800810332899	FALSE
paip2b	DreINT0109765	chr1:40764339-40767638	3300	chr1:40764181-40764338=40767639-40767812:+	none	0.164324084736734	none	0.205217636337298	none	0.172213564487756	FALSE
paip2b	DreINT0109766	chr1:40767813-40768125	313	chr1:40767639-40767812=40768126-40769300:+	none	0.653336491776915	none	0.610048068177581	none	0.64676849138209	FALSE
slc43a3a	DreINT0151220	chr1:43455529-43455599	71	chr1:43455600-43456143=43455399-43455528:-	none	0.920375335748037	none	0.808181521242707	none	0.844418608670466	TRUE
slc43a3a	DreINT0151223	chr1:43450265-43455398	5134	chr1:43455399-43455528=43450218-43450264:-	none	0.419156406545026	none	0.438504229518091	none	0.553520389233175	TRUE
slc43a3a	DreINT0151224	chr1:43450129-43450217	89	chr1:43450218-43450264=43450052-43450128:-	none	0.520052047612305	none	0.478221941008243	none	0.522667782182525	TRUE
slc43a3a	DreINT0151225	chr1:43449970-43450051	82	chr1:43450052-43450128=43449877-43449969:-	none	0.476107744828866	none	0.433285362918418	none	0.516506075297141	TRUE
slc43a3a	DreINT0151226	chr1:43449499-43449876	378	chr1:43449877-43449969=43449359-43449498:-	none	0.563774816823258	none	0.530473355896283	none	0.531112244763759	TRUE
slc43a3a	DreINT0151227	chr1:43446698-43449358	2661	chr1:43449359-43449498=43446558-43446697:-	none	0.590055400599102	none	0.632059564784835	none	0.590092869583166	TRUE
slc43a3a	DreINT0151228	chr1:43446441-43446557	117	chr1:43446558-43446697=43446300-43446440:-	none	0.290069379322219	none	0.320909008815793	none	0.417357669815897	TRUE
slc43a3a	DreINT0151229	chr1:43444419-43446299	1881	chr1:43446300-43446440=43444311-43444418:-	none	0.339133418848637	none	0.361463364174902	none	0.442760774761961	TRUE
slc43a3a	DreINT0151230	chr1:43444237-43444310	74	chr1:43444311-43444418=43444050-43444236:-	none	0.510435904628976	none	0.492120098339811	none	0.596573342429656	TRUE
slc43a3a	DreINT0151221	chr1:43442033-43444049	2017	chr1:43444050-43444236=43441912-43442032:-	none	0.495842219627017	none	0.549839398688676	none	0.509448590614121	TRUE
slc43a3a	DreINT0151222	chr1:43440699-43441911	1213	chr1:43441912-43442032=43440003-43440698:-	none	0.79155593581083	none	0.801979086468331	none	0.863146028333949	TRUE
asb5b	DreINT0034009	chr1:38091831-38098136	6306	chr1:38098137-38098381=38091751-38091830:-	none	0.481144928172167	none	0.502149732482811	none	0.471508866998939	TRUE
asb5b	DreINT0034010	chr1:38091579-38091750	172	chr1:38091751-38091830=38091471-38091578:-	none	0.611285522679662	none	0.588759985511506	none	0.66109712181486	FALSE
asb5b	DreINT0034011	chr1:38090497-38091470	974	chr1:38091471-38091578=38090346-38090496:-	none	0.824975780693357	none	0.829385021019005	none	0.806429688142949	FALSE
asb5b	DreINT0034012	chr1:38090083-38090345	263	chr1:38090346-38090496=38089948-38090082:-	none	0.418622318206947	none	0.494663099213743	none	0.453253304817699	FALSE
asb5b	DreINT0034013	chr1:38089114-38089947	834	chr1:38089948-38090082=38088922-38089113:-	none	0.616209702839796	none	0.663608305731687	none	0.741388867497328	FALSE
asb5b	DreINT0034014	chr1:38087292-38088921	1630	chr1:38088922-38089113=38086657-38087291:-	none	0.773303158643076	none	0.78336946492437	none	0.846317864320459	FALSE
cfap97	DreINT0045659	chr1:16996922-17000119	3198	chr1:17000120-17000336=16996067-16996921:-	none	0.816516378842986	none	0.801804974824038	none	0.759880062555315	TRUE
cfap97	DreINT0045660	chr1:16995995-16996066	72	chr1:16996067-16996921=16995705-16995994:-	none	0.977171243930547	none	0.914567569092289	none	0.930346555596931	TRUE
cfap97	DreINT0045661	chr1:16990385-16995704	5320	chr1:16995705-16995994=16990246-16990384:-	none	0.341116064551427	none	0.39726471095498	none	0.421861963625777	TRUE
cfap97	DreINT0045662	chr1:16988639-16990245	1607	chr1:16990246-16990384=16988107-16988638:-	none	0.632992524912337	none	0.691502091361072	none	0.771417763097427	TRUE
gyg2	DreINT0076142	chr1:32618711-32621043	2333	chr1:32621044-32621210=32618572-32618710:-	none	0.612804190845451	none	0.586615049628709	none	0.563717152637559	TRUE
gyg2	DreINT0076143	chr1:32618377-32618571	195	chr1:32618572-32618710=32618202-32618376:-	none	0.448922222960995	none	0.506346251330659	none	0.511365232072363	TRUE
gyg2	DreINT0076144	chr1:32615878-32618201	2324	chr1:32618202-32618376=32615715-32615877:-	none	0.336501578173347	none	0.423105237569101	none	0.388594184712723	TRUE
gyg2	DreINT0076145	chr1:32612324-32615714	3391	chr1:32615715-32615877=32612197-32612323:-	none	0.336455716490853	none	0.426112789640638	none	0.43668260274387	TRUE
gyg2	DreINT0076146	chr1:32612057-32612196	140	chr1:32612197-32612323=32611837-32612056:-	none	0.426721316018582	none	0.456251281711509	none	0.496158921352052	TRUE
gyg2	DreINT0076147	chr1:32609319-32611836	2518	chr1:32611837-32612056=32609166-32609318:-	none	0.421347482153453	none	0.477431309929881	none	0.465215209547174	TRUE
gyg2	DreINT0076148	chr1:32606751-32609165	2415	chr1:32609166-32609318=32606631-32606750:-	none	0.294706559891424	none	0.357751028535758	none	0.417573009381694	TRUE
gyg2	DreINT0076149	chr1:32605283-32606630	1348	chr1:32606631-32606750=32604895-32605282:-	none	0.793273053361417	none	0.804242704040462	none	0.838564929577343	TRUE
usp53b	DreINT0172961	chr1:25214690-25220286	5597	chr1:25220287-25220463=25214597-25214689:-	none	0.573591006540026	none	0.574712841418732	none	0.499694662309381	TRUE
usp53b	DreINT0172962	chr1:25213663-25214596	934	chr1:25214597-25214689=25213528-25213662:-	none	0.351319670490492	none	0.395429852217542	none	0.457110600603303	TRUE
usp53b	DreINT0172963	chr1:25211330-25213527	2198	chr1:25213528-25213662=25211216-25211329:-	none	0.404852689546299	none	0.457948827495851	none	0.552374122446452	TRUE
usp53b	DreINT0172964	chr1:25211012-25211215	204	chr1:25211216-25211329=25210929-25211011:-	none	0.466353475274423	none	0.481302811056197	none	0.495713533733815	TRUE
usp53b	DreINT0172965	chr1:25209876-25210928	1053	chr1:25210929-25211011=25209770-25209875:-	none	0.382994530621733	none	0.431794598397488	none	0.491603918152473	TRUE
usp53b	DreINT0172966	chr1:25208085-25209769	1685	chr1:25209770-25209875=25207938-25208084:-	none	0.261891904479646	none	0.318924136406785	none	0.343813562351455	TRUE
usp53b	DreINT0172967	chr1:25198546-25207937	9392	chr1:25207938-25208084=25198396-25198545:-	none	0.476349887374833	none	0.589216432300039	none	0.647847029831616	TRUE
usp53b	DreINT0172968	chr1:25195777-25198395	2619	chr1:25198396-25198545=25195608-25195776:-	none	0.645557165129629	none	0.659444882713642	none	0.692687467633075	TRUE
si:dkey-79f11.5	DreINT0146827	chr1:7314383-7316206	1824	chr1:7316207-7316317=7314349-7314382:-	none	0.675595661747223	none	0.676551133170078	none	0.508565252137205	TRUE
si:dkey-79f11.5	DreINT0146828	chr1:7313816-7314348	533	chr1:7314349-7314382=7313611-7313815:-	none	0.508817903396975	none	0.552906872527993	none	0.556654715236218	TRUE
si:dkey-79f11.5	DreINT0146829	chr1:7313505-7313610	106	chr1:7313611-7313815=7313358-7313504:-	none	0.578521678969691	none	0.544325445290309	none	0.536132539470277	TRUE
si:dkey-79f11.5	DreINT0146830	chr1:7310818-7313080	2263	chr1:7313081-7313252=7310717-7310817:-	none	0.486276482635943	none	0.539769563216368	none	0.543581354738618	TRUE
si:dkey-79f11.5	DreINT0146831	chr1:7310628-7310716	89	chr1:7310717-7310817=7310001-7310627:-	none	0.939960058790625	none	0.923171958092634	none	0.935447797133684	TRUE
crb3b	DreINT0051797	chr1:55511276-55514452	3177	chr1:55511120-55511275=55514453-55515632:+	none	0.93565359746035	none	0.926426818584325	none	0.902982531233712	TRUE
si:ch211-217k17.3	DreINT0138157	chr1:51870610-51875634	5025	chr1:51870327-51870609=51875635-51876018:+	none	0.791380593391021	none	0.778127332054853	none	0.811688855427334	TRUE
si:dkey-9i23.6	DreINT0147296	chr1:44093286-44095181	1896	chr1:44095182-44095228=44092113-44093285:-	none	0.889503825406557	none	0.894297382137942	none	0.807612721816507	TRUE
si:dkey-9i23.6	DreINT0147297	chr1:44090675-44092112	1438	chr1:44092113-44093285=44090604-44090674:-	none	0.68416357388124	none	0.695068319477432	none	0.718868056439183	TRUE
si:dkey-9i23.6	DreINT0147298	chr1:44087305-44090603	3299	chr1:44090604-44090674=44086794-44087304:-	none	0.639417887275906	none	0.645672700994875	none	0.689764383080215	TRUE
si:dkey-9i23.6	DreINT0147299	chr1:44086105-44086793	689	chr1:44086794-44087304=44086014-44086104:-	none	0.536544083268735	none	0.53722605266039	none	0.491347629955222	TRUE
si:dkey-9i23.6	DreINT0147300	chr1:44083936-44086013	2078	chr1:44086014-44086104=44083490-44083935:-	none	0.853171088145666	none	0.847549452120433	none	0.857479863218852	TRUE
lrata	DreINT0090219	chr1:25006522-25006603	82	chr1:25005969-25006521=25006604-25007210:+	none	0.971136240433156	none	0.914727954561858	IR_IN_SNIP1_KD	0.943500120500387	FALSE
si:ch211-113e8.6	DreINT0135455	chr1:39468676-39471738	3063	chr1:39471739-39471820=39468334-39468675:-	none	0.859953626889251	none	0.854892486041527	none	0.786825341573966	TRUE
si:ch211-286b5.4	DreINT0140052	chr1:54583939-54585975	2037	chr1:54585976-54586089=54583865-54583938:-	none	0.53890144840232	none	0.522913707311438	none	0.408313381936427	TRUE
si:ch211-286b5.4	DreINT0140056	chr1:54582075-54583864	1790	chr1:54583865-54583938=54581977-54582074:-	none	0.563295426196797	none	0.540517910616117	none	0.559595566881671	TRUE
si:ch211-286b5.4	DreINT0140057	chr1:54581578-54581976	399	chr1:54581977-54582074=54581509-54581577:-	none	0.54189787305267	none	0.556604195892647	none	0.513382563731685	TRUE
si:ch211-286b5.4	DreINT0140058	chr1:54581224-54581508	285	chr1:54581509-54581577=54581100-54581223:-	none	0.370828656043646	none	0.404539722717322	none	0.440774981027692	TRUE
si:ch211-286b5.4	DreINT0140059	chr1:54579872-54581099	1228	chr1:54581100-54581223=54579793-54579871:-	none	0.477840079987298	none	0.530789599763305	none	0.640564900584109	TRUE
si:ch211-286b5.4	DreINT0140060	chr1:54579679-54579792	114	chr1:54579793-54579871=54579561-54579678:-	none	0.571364133305081	none	0.616380270679074	none	0.635705901408255	TRUE
si:ch211-286b5.4	DreINT0140061	chr1:54578846-54579560	715	chr1:54579561-54579678=54578695-54578845:-	none	0.681259742590918	none	0.760263284807903	none	0.748266165208307	TRUE
si:ch211-286b5.4	DreINT0140062	chr1:54576917-54578694	1778	chr1:54578695-54578845=54576813-54576916:-	none	0.44049998043223	none	0.480395484068374	none	0.57187443453986	TRUE
si:ch211-286b5.4	DreINT0140063	chr1:54576744-54576812	69	chr1:54576813-54576916=54576582-54576743:-	none	0.772104206038814	none	0.777852994389839	none	0.820236445648037	TRUE
si:ch211-286b5.4	DreINT0140053	chr1:54573744-54576581	2838	chr1:54576582-54576743=54573626-54573743:-	none	0.142146939102582	none	0.194341472157955	none	0.280567163297176	TRUE
si:ch211-286b5.4	DreINT0140054	chr1:54573549-54573625	77	chr1:54573626-54573743=54573401-54573548:-	none	0.73977753914164	none	0.740325998045829	none	0.730750353903604	TRUE
si:ch211-286b5.4	DreINT0140055	chr1:54572582-54573400	819	chr1:54573401-54573548=54572456-54572581:-	none	0.749939333490678	none	0.778852438432538	none	0.805890823158179	TRUE
epha6	DreINT0063727	chr1:33237124-33268784	31661	chr1:33236469-33237123=33268785-33268849:+	none	0.10389291787548	none	0.137386072855739	none	0.25012505732714	TRUE
epha6	DreINT0063736	chr1:33268850-33310406	41557	chr1:33268785-33268849=33310407-33311073:+	none	0.035573672181896	none	0.0634069601414543	none	0.23834217028076	TRUE
epha6	DreINT0063737	chr1:33402218-33404886	2669	chr1:33402062-33402217=33404887-33405222:+	none	0.418775853047134	none	0.556403534397373	none	0.558690875754004	TRUE
epha6	DreINT0063738	chr1:33405223-33443883	38661	chr1:33404887-33405222=33443884-33444008:+	none	0.0137109391737065	none	0.0272709515925932	none	0.104696354877616	TRUE
epha6	DreINT0063739	chr1:33444009-33444084	76	chr1:33443884-33444008=33444085-33444247:+	none	0.498422390342309	none	0.458727749009476	none	0.476720408112445	TRUE
epha6	DreINT0063740	chr1:33444248-33444699	452	chr1:33444085-33444247=33444700-33444808:+	none	0.534173988528167	none	0.558641285748041	none	0.558811647486097	TRUE
epha6	DreINT0063741	chr1:33444809-33448736	3928	chr1:33444700-33444808=33448737-33448807:+	none	0.370474661482133	none	0.398322064660348	none	0.504866292738804	TRUE
epha6	DreINT0063742	chr1:33448808-33448903	96	chr1:33448737-33448807=33448904-33449029:+	none	0.285946660146095	none	0.299204629772049	none	0.341115744289742	TRUE
epha6	DreINT0063728	chr1:33449030-33449757	728	chr1:33448904-33449029=33449758-33449943:+	none	0.549530388129245	none	0.591040898466609	none	0.531810637278246	TRUE
epha6	DreINT0063729	chr1:33449944-33452465	2522	chr1:33449758-33449943=33452466-33452527:+	none	0.249900981512326	none	0.318263570075178	none	0.354673582896687	TRUE
epha6	DreINT0063730	chr1:33452528-33456297	3770	chr1:33452466-33452527=33456298-33456507:+	none	0.389690561277061	none	0.432338377767561	none	0.451425270360996	TRUE
epha6	DreINT0063731	chr1:33456508-33461378	4871	chr1:33456298-33456507=33461379-33461543:+	none	0.417209631931326	none	0.494763424109042	none	0.503570319221986	TRUE
epha6	DreINT0063732	chr1:33461544-33463108	1565	chr1:33461379-33461543=33463109-33463302:+	none	0.367775999499713	none	0.44546168779244	none	0.490631147943677	TRUE
epha6	DreINT0063733	chr1:33463303-33464659	1357	chr1:33463109-33463302=33464660-33464809:+	none	0.337097708074603	none	0.384942590945562	none	0.432384326737322	TRUE
epha6	DreINT0063734	chr1:33464810-33465203	394	chr1:33464660-33464809=33465204-33465312:+	none	0.430267358897285	none	0.465745243721924	none	0.45200940273456	TRUE
epha6	DreINT0063735	chr1:33465313-33466544	1232	chr1:33465204-33465312=33466545-33468627:+	none	0.961685464338334	none	0.95798753998772	none	0.964649748297044	TRUE
pcm1	DreINT0111041	chr1:15928525-15932724	4200	chr1:15928408-15928524=15932725-15932842:+	none	0.607976475643659	none	0.618731515013337	none	0.478672882953824	FALSE
pcm1	DreINT0111052	chr1:15932843-15933548	706	chr1:15932725-15932842=15933549-15933794:+	none	0.597917963335342	none	0.615287020000815	none	0.555986515104551	FALSE
pcm1	DreINT0111063	chr1:15933795-15934037	243	chr1:15933549-15933794=15934038-15934337:+	none	0.639922542351059	none	0.63633280504575	none	0.607912764259738	FALSE
pcm1	DreINT0111073	chr1:15934338-15936880	2543	chr1:15934038-15934337=15936881-15937051:+	none	0.464353864623329	none	0.497205063120742	none	0.496475328312267	TRUE
pcm1	DreINT0111074	chr1:15937052-15940353	3302	chr1:15936881-15937051=15940354-15940531:+	none	0.304990619076565	none	0.385490616199478	none	0.354440064138369	TRUE
pcm1	DreINT0111075	chr1:15940532-15940627	96	chr1:15940354-15940531=15940628-15940737:+	none	0.799881634577827	none	0.758017989374907	none	0.738830004342261	FALSE
pcm1	DreINT0111076	chr1:15940738-15941077	340	chr1:15940628-15940737=15941078-15941324:+	none	0.266361025092872	none	0.344128783230802	none	0.316406244477625	TRUE
pcm1	DreINT0111077	chr1:15941325-15941426	102	chr1:15941078-15941324=15941427-15941577:+	none	0.554221016846211	none	0.52853386219325	none	0.602283949344203	FALSE
pcm1	DreINT0111078	chr1:15941578-15941683	106	chr1:15941427-15941577=15941684-15941878:+	none	0.632823615627021	none	0.597506980781884	none	0.635254531723135	FALSE
pcm1	DreINT0111042	chr1:15941879-15942012	134	chr1:15941684-15941878=15942013-15942176:+	none	0.502946157444141	none	0.4788739326398	none	0.441821990062799	FALSE
pcm1	DreINT0111043	chr1:15942177-15942279	103	chr1:15942013-15942176=15942280-15942515:+	none	0.569013457138861	none	0.528942923984642	none	0.631202410662252	FALSE
pcm1	DreINT0111044	chr1:15942516-15942596	81	chr1:15942280-15942515=15942597-15942715:+	none	0.709190035684468	none	0.654138738338255	none	0.679545203703815	FALSE
pcm1	DreINT0111045	chr1:15942716-15942794	79	chr1:15942597-15942715=15942795-15942924:+	none	0.619110836914168	none	0.587919505227972	none	0.642310396463319	FALSE
pcm1	DreINT0111046	chr1:15942925-15943032	108	chr1:15942795-15942924=15943033-15943197:+	none	0.578774483212901	none	0.5498129382691	none	0.599589661129692	FALSE
pcm1	DreINT0111047	chr1:15943198-15944913	1716	chr1:15943033-15943197=15944914-15945077:+	none	0.397101400154553	none	0.447503484677204	none	0.443799284822018	FALSE
pcm1	DreINT0111048	chr1:15945078-15945151	74	chr1:15944914-15945077=15945152-15945346:+	none	0.648812742181749	none	0.615533859645345	none	0.662422661524961	FALSE
pcm1	DreINT0111049	chr1:15945347-15945433	87	chr1:15945152-15945346=15945434-15945683:+	none	0.579063342129832	none	0.528460960699404	none	0.571725494009914	FALSE
pcm1	DreINT0111050	chr1:15945684-15945759	76	chr1:15945434-15945683=15945760-15945905:+	none	0.498310932453282	none	0.422750781726716	IR_IN_SNIP1_KD	0.538893540253094	FALSE
pcm1	DreINT0111051	chr1:15945906-15946455	550	chr1:15945760-15945905=15946456-15946631:+	none	0.116158777191449	none	0.13710493887515	none	0.223108144368195	FALSE
pcm1	DreINT0111053	chr1:15946632-15946766	135	chr1:15946456-15946631=15946767-15946893:+	none	0.387630829975462	none	0.40191607064174	none	0.413306097660801	TRUE
pcm1	DreINT0111054	chr1:15946894-15947030	137	chr1:15946767-15946893=15947031-15947383:+	none	0.39309560186054	none	0.350709132874537	none	0.376603928874538	FALSE
pcm1	DreINT0111055	chr1:15947384-15948647	1264	chr1:15947031-15947383=15948648-15948809:+	none	0.446687649380141	none	0.469196225163592	none	0.484684983271115	FALSE
pcm1	DreINT0111056	chr1:15948810-15949085	276	chr1:15948648-15948809=15949086-15949142:+	none	0.459525255284113	none	0.445400678387839	none	0.591346332710823	FALSE
pcm1	DreINT0111057	chr1:15949143-15949681	539	chr1:15949086-15949142=15949682-15949854:+	none	0.322365940478679	none	0.383356831519395	none	0.38974282343185	FALSE
pcm1	DreINT0111058	chr1:15949855-15950500	646	chr1:15949682-15949854=15950501-15950632:+	none	0.139477682225971	none	0.204947989477336	none	0.221868298546946	FALSE
pcm1	DreINT0111059	chr1:15950633-15950732	100	chr1:15950501-15950632=15950733-15950865:+	none	0.495534223679453	none	0.469180031071833	none	0.582582030154191	FALSE
pcm1	DreINT0111060	chr1:15950866-15951061	196	chr1:15950733-15950865=15951062-15951208:+	none	0.647796994015502	none	0.656936361297935	none	0.678705153364637	FALSE
pcm1	DreINT0111061	chr1:15951209-15953231	2023	chr1:15951062-15951208=15953232-15953335:+	none	0.282206274166809	none	0.36577616380783	none	0.37443831714103	FALSE
pcm1	DreINT0111062	chr1:15953336-15953432	97	chr1:15953232-15953335=15953433-15953567:+	none	0.477875761921973	none	0.465802797420758	none	0.519932164279793	FALSE
pcm1	DreINT0111064	chr1:15953568-15953734	167	chr1:15953433-15953567=15953735-15953932:+	none	0.405405186932525	none	0.442533377132452	none	0.474664350130934	FALSE
pcm1	DreINT0111065	chr1:15953933-15954020	88	chr1:15953735-15953932=15954021-15954080:+	none	0.664595112099779	none	0.602950555581441	none	0.644814271264632	FALSE
pcm1	DreINT0111066	chr1:15954081-15954901	821	chr1:15954021-15954080=15954902-15955022:+	none	0.480274986367513	none	0.494072004437925	none	0.469914677781082	FALSE
pcm1	DreINT0111067	chr1:15955023-15956992	1970	chr1:15954902-15955022=15956993-15957144:+	none	0.309315790845905	none	0.363532049356069	none	0.341310449431479	TRUE
pcm1	DreINT0111068	chr1:15957145-15957227	83	chr1:15956993-15957144=15957228-15957297:+	none	0.465064039594955	none	0.436990161735457	none	0.532317955221945	FALSE
pcm1	DreINT0111069	chr1:15957298-15957408	111	chr1:15957228-15957297=15957409-15957599:+	none	0.313286141047916	none	0.314716158766516	none	0.352881833159738	FALSE
pcm1	DreINT0111070	chr1:15957600-15957687	88	chr1:15957409-15957599=15957688-15957780:+	none	0.547257571517314	none	0.500177764539165	none	0.586939704535167	FALSE
pcm1	DreINT0111071	chr1:15957781-15958015	235	chr1:15957688-15957780=15958016-15958139:+	none	0.43474544991011	none	0.465261137782226	none	0.474647341774747	FALSE
pcm1	DreINT0111072	chr1:15958140-15960498	2359	chr1:15958016-15958139=15960499-15961224:+	none	0.893294335567512	none	0.884322704270984	none	0.888720487591513	FALSE
gpm6ab	DreINT0074322	chr1:37942071-37943236	1166	chr1:37943237-37943393=37941896-37942070:-	none	0.125082438838826	none	0.130354780427415	none	0.106072178818539	TRUE
gpm6ab	DreINT0074323	chr1:37939399-37941895	2497	chr1:37941896-37942070=37939322-37939398:-	none	0.110079655408951	none	0.113492403194802	none	0.132749539460515	FALSE
gpm6ab	DreINT0074324	chr1:37937272-37939321	2050	chr1:37939322-37939398=37937206-37937271:-	none	0.106855235537897	none	0.110206753487806	none	0.0911340654483434	FALSE
gpm6ab	DreINT0074325	chr1:37933012-37937205	4194	chr1:37937206-37937271=37930837-37933011:-	none	0.840378790937999	none	0.857295636831342	none	0.926803956478315	FALSE
frem3	DreINT0069830	chr1:34916551-34916662	112	chr1:34916663-34921533=34916461-34916550:-	none	0.999965828590067	none	0.998484915549829	none	0.99935527615895	FALSE
frem3	DreINT0069841	chr1:34904712-34916460	11749	chr1:34916461-34916550=34904565-34904711:-	none	0.331033181248715	none	0.416574192414804	none	0.436760029583317	FALSE
frem3	DreINT0069846	chr1:34901863-34904564	2702	chr1:34904565-34904711=34901632-34901862:-	none	0.539713400317191	none	0.56751536089558	none	0.496340705845807	FALSE
frem3	DreINT0069847	chr1:34901372-34901631	260	chr1:34901632-34901862=34901246-34901371:-	none	0.28821417520316	none	0.335699331824167	none	0.348470024266251	FALSE
frem3	DreINT0069848	chr1:34900710-34901245	536	chr1:34901246-34901371=34900458-34900709:-	none	0.452716530467332	none	0.471491986721705	none	0.413931269015906	FALSE
frem3	DreINT0069849	chr1:34898392-34900457	2066	chr1:34900458-34900709=34898242-34898391:-	none	0.418540415726364	none	0.460685912997556	none	0.455348763392627	FALSE
frem3	DreINT0069850	chr1:34898089-34898241	153	chr1:34898242-34898391=34897879-34898088:-	none	0.519449176300268	none	0.532760158001719	none	0.553077742624313	FALSE
frem3	DreINT0069851	chr1:34896841-34897878	1038	chr1:34897879-34898088=34896643-34896840:-	none	0.676093185029141	none	0.670509984465399	none	0.580756333144356	FALSE
frem3	DreINT0069852	chr1:34896552-34896642	91	chr1:34896643-34896840=34896387-34896551:-	none	0.583701410497909	none	0.561939207114742	none	0.598152270512142	FALSE
frem3	DreINT0069831	chr1:34896288-34896386	99	chr1:34896387-34896551=34896105-34896287:-	none	0.574306942951438	none	0.560445585038337	none	0.551068239683184	FALSE
frem3	DreINT0069832	chr1:34895942-34896104	163	chr1:34896105-34896287=34895811-34895941:-	none	0.605788807168159	none	0.640183643584459	none	0.619518269437241	FALSE
frem3	DreINT0069833	chr1:34893584-34895810	2227	chr1:34895811-34895941=34893425-34893583:-	none	0.445857152011546	none	0.458981784892295	none	0.503128758175052	FALSE
frem3	DreINT0069834	chr1:34893172-34893424	253	chr1:34893425-34893583=34892868-34893171:-	none	0.365455262192645	none	0.416590957170102	none	0.376523859883516	FALSE
frem3	DreINT0069835	chr1:34891803-34892867	1065	chr1:34892868-34893171=34891671-34891802:-	none	0.391467994967824	none	0.440886369521213	none	0.442411033441817	FALSE
frem3	DreINT0069836	chr1:34891578-34891670	93	chr1:34891671-34891802=34891246-34891577:-	none	0.491635128264032	none	0.464778788948081	none	0.465095769037252	FALSE
frem3	DreINT0069837	chr1:34889009-34891245	2237	chr1:34891246-34891577=34888816-34889008:-	none	0.482242890384722	none	0.50685359443941	none	0.484464896834386	FALSE
frem3	DreINT0069838	chr1:34888633-34888815	183	chr1:34888816-34889008=34888528-34888632:-	none	0.348351132680722	none	0.384855743072811	none	0.432125229943568	FALSE
frem3	DreINT0069839	chr1:34887316-34888527	1212	chr1:34888528-34888632=34887188-34887315:-	none	0.465336925087832	none	0.500614136177255	none	0.479957981359259	FALSE
frem3	DreINT0069840	chr1:34887073-34887187	115	chr1:34887188-34887315=34886938-34887072:-	none	0.578790185542949	none	0.552795151557082	none	0.531401629791372	FALSE
frem3	DreINT0069842	chr1:34885866-34886937	1072	chr1:34886938-34887072=34885739-34885865:-	none	0.270453903628791	none	0.335119662152427	none	0.37071335392081	FALSE
frem3	DreINT0069843	chr1:34885632-34885738	107	chr1:34885739-34885865=34885444-34885631:-	none	0.291466035243823	none	0.274828083189141	none	0.371549050200681	FALSE
frem3	DreINT0069844	chr1:34883406-34885443	2038	chr1:34885444-34885631=34883259-34883405:-	none	0.392236799318836	none	0.440784321735794	none	0.384245050879796	FALSE
frem3	DreINT0069845	chr1:34883162-34883258	97	chr1:34883259-34883405=34882062-34883161:-	none	0.952772601736911	none	0.934453787918812	none	0.946220153889741	FALSE
nlgn4a	DreINT0104821	chr1:31789308-31795236	5929	chr1:31789011-31789307=31795237-31795991:+	none	0.655102741956986	none	0.704190341076646	none	0.643599223247215	TRUE
nlgn4a	DreINT0104822	chr1:31795992-31844576	48585	chr1:31795237-31795991=31844577-31844729:+	none	0.0627822818204729	none	0.0973289448206042	none	0.191422045348037	TRUE
nlgn4a	DreINT0104823	chr1:31844730-31922622	77893	chr1:31844577-31844729=31922623-31922808:+	none	0.00123749706180208	none	0.00352264672039424	none	0.0292244425602446	TRUE
nlgn4a	DreINT0104824	chr1:31922809-31936119	13311	chr1:31922623-31922808=31936120-31936909:+	none	0.386627391700064	none	0.459249263229195	none	0.455374085924937	TRUE
nlgn4a	DreINT0104825	chr1:31936910-31958249	21340	chr1:31936120-31936909=31958250-31960787:+	none	0.655514939316481	none	0.707224637974088	none	0.775778436315907	TRUE
si:dkey-9c18.9	DreINT0147279	chr1:54909385-54909524	140	chr1:54909152-54909384=54909525-54909591:+	none	0.546694038153854	none	0.534878280249984	none	0.591834899249606	TRUE
si:dkey-9c18.9	DreINT0147280	chr1:54909592-54909669	78	chr1:54909525-54909591=54909670-54909761:+	none	0.618335986673522	none	0.584764592237539	none	0.556213738997449	TRUE
mhc1zea	DreINT0095832	chr1:46430243-46430774	532	chr1:46430775-46430882=46429967-46430242:-	none	0.634532823459984	none	0.630018548816062	none	0.608868630437085	FALSE
mhc1zea	DreINT0095833	chr1:46429660-46429966	307	chr1:46429967-46430242=46429372-46429659:-	none	0.488141397618619	none	0.520564637478393	none	0.461790487251699	TRUE
mhc1zea	DreINT0095834	chr1:46429293-46429371	79	chr1:46429372-46429659=46429014-46429292:-	none	0.69871216926211	none	0.610398778613392	none	0.626348744412871	TRUE
mhc1zea	DreINT0095835	chr1:46428926-46429013	88	chr1:46429014-46429292=46428801-46428925:-	none	0.681059460552579	none	0.598605092367807	none	0.627719313962635	TRUE
mhc1zea	DreINT0095836	chr1:46426208-46428800	2593	chr1:46428801-46428925=46426172-46426207:-	none	0.491753621976032	none	0.512573346686807	none	0.508712226094199	TRUE
mhc1zea	DreINT0095837	chr1:46425824-46426171	348	chr1:46426172-46426207=46424889-46425823:-	none	0.838889069330018	none	0.815762585995524	IR_IN_SNIP1_KD	0.833232360724614	FALSE
C1H20orf27 (2 of 2)	DreINT0003119	chr1:44379677-44383890	4214	chr1:44379594-44379676=44383891-44384002:+	none	0.573667070535688	none	0.617825692777508	none	0.592854735287744	TRUE
C1H20orf27 (2 of 2)	DreINT0003120	chr1:44384003-44384971	969	chr1:44383891-44384002=44384972-44385105:+	none	0.28889683707104	none	0.370195516714959	none	0.420926183297879	TRUE
C1H20orf27 (2 of 2)	DreINT0003121	chr1:44385106-44386360	1255	chr1:44384972-44385105=44386361-44386511:+	none	0.261693343701955	none	0.301220893932599	none	0.368753488706537	TRUE
C1H20orf27 (2 of 2)	DreINT0003122	chr1:44386512-44390239	3728	chr1:44386361-44386511=44390240-44390365:+	none	0.255109084688115	none	0.401409406448641	none	0.39258707148749	TRUE
C1H20orf27 (2 of 2)	DreINT0003123	chr1:44390366-44392355	1990	chr1:44390240-44390365=44392356-44393223:+	none	0.883890102750021	none	0.912136945095155	none	0.907246007904098	TRUE
mxb	DreINT0099281	chr1:6898532-6899143	612	chr1:6899144-6899426=6898394-6898531:-	none	0.612501357099418	none	0.625833340058074	none	0.554201874763926	TRUE
zp3c	DreINT0181769	chr1:48873812-48876352	2541	chr1:48876353-48876991=48873699-48873811:-	none	0.52866214694338	none	0.523680441158206	none	0.582215179616966	TRUE
zp3c	DreINT0181770	chr1:48873600-48873698	99	chr1:48873699-48873811=48873493-48873599:-	none	0.368562736249385	none	0.362967672735594	none	0.427667524066345	TRUE
zp3c	DreINT0181771	chr1:48871724-48873492	1769	chr1:48873493-48873599=48871549-48871723:-	none	0.48304637824475	none	0.499425740544593	none	0.485878788134925	TRUE
zp3c	DreINT0181772	chr1:48870658-48871548	891	chr1:48871549-48871723=48870531-48870657:-	none	0.542553913731118	none	0.534181096033671	none	0.547530512112292	TRUE
zp3c	DreINT0181773	chr1:48870420-48870530	111	chr1:48870531-48870657=48870331-48870419:-	none	0.377895991523033	none	0.35788842405619	none	0.366707314256317	TRUE
zp3c	DreINT0181774	chr1:48870195-48870330	136	chr1:48870331-48870419=48870118-48870194:-	none	0.386418138185412	none	0.38939576673551	none	0.430787393915076	TRUE
zp3c	DreINT0181775	chr1:48870045-48870117	73	chr1:48870118-48870194=48869805-48870044:-	none	0.865581799545594	none	0.835174661301033	none	0.897321842421683	TRUE
sept3	DreINT0133059	chr1:44939841-44941963	2123	chr1:44941964-44942160=44939601-44939840:-	none	0.489252839809868	none	0.495671372621979	none	0.409511186741009	FALSE
sept3	DreINT0133060	chr1:44939518-44939600	83	chr1:44939601-44939840=44939389-44939517:-	none	0.555542718502384	none	0.49516260428031	none	0.59102389830896	FALSE
sept3	DreINT0133061	chr1:44935951-44939388	3438	chr1:44939389-44939517=44935869-44935950:-	none	0.406788527138764	none	0.452454091015195	none	0.421794546398813	FALSE
sept3	DreINT0133062	chr1:44932467-44935868	3402	chr1:44935869-44935950=44932329-44932466:-	none	0.426884773812186	none	0.433929174022926	none	0.436024976115517	TRUE
sept3	DreINT0133063	chr1:44930679-44932328	1650	chr1:44932329-44932466=44930561-44930678:-	none	0.383366412675788	none	0.471409933021143	none	0.413173658931587	TRUE
sept3	DreINT0133064	chr1:44930484-44930560	77	chr1:44930561-44930678=44930388-44930483:-	none	0.614204185409769	none	0.572772287628689	none	0.663924167552117	FALSE
sept3	DreINT0133065	chr1:44930288-44930387	100	chr1:44930388-44930483=44930191-44930287:-	none	0.590945275738332	none	0.552591180815714	none	0.493472010877428	FALSE
sept3	DreINT0133066	chr1:44927986-44930190	2205	chr1:44930191-44930287=44927934-44927985:-	none	0.261116490576873	none	0.290362803175683	none	0.382058377236504	FALSE
sept3	DreINT0133067	chr1:44926144-44927933	1790	chr1:44927934-44927985=44924847-44926143:-	none	0.855595851419789	none	0.868059617163263	none	0.846336539615423	FALSE
pdia2	DreINT0111959	chr1:9270663-9274210	3548	chr1:9270378-9270662=9274211-9274417:+	none	0.709049675786265	none	0.68769285804324	none	0.650367910983472	TRUE
pdia2	DreINT0111961	chr1:9274418-9274509	92	chr1:9274211-9274417=9274510-9274643:+	none	0.657306960539534	none	0.603444144166695	none	0.629791867626923	TRUE
pdia2	DreINT0111962	chr1:9274644-9275535	892	chr1:9274510-9274643=9275536-9275673:+	none	0.529151956516001	none	0.543444724813885	none	0.513900165433242	TRUE
pdia2	DreINT0111963	chr1:9275674-9276944	1271	chr1:9275536-9275673=9276945-9277061:+	none	0.610254339523456	none	0.61995590522885	none	0.582323246039697	TRUE
pdia2	DreINT0111964	chr1:9277062-9277198	137	chr1:9276945-9277061=9277199-9277324:+	none	0.329901286197616	none	0.340995311641378	none	0.404112507825696	TRUE
pdia2	DreINT0111965	chr1:9277325-9277413	89	chr1:9277199-9277324=9277414-9277611:+	none	0.811137977296326	none	0.779904195758696	none	0.733827565188858	TRUE
pdia2	DreINT0111966	chr1:9277612-9277693	82	chr1:9277414-9277611=9277694-9277814:+	none	0.698734158907169	none	0.643267190338346	none	0.681136205825912	TRUE
pdia2	DreINT0111967	chr1:9277815-9278214	400	chr1:9277694-9277814=9278215-9278396:+	none	0.52108451708952	none	0.509044603556114	none	0.552604503841803	TRUE
pdia2	DreINT0111968	chr1:9278397-9280186	1790	chr1:9278215-9278396=9280187-9280324:+	none	0.663888736874672	none	0.63999391040189	none	0.667295045040148	TRUE
pdia2	DreINT0111960	chr1:9280325-9280455	131	chr1:9280187-9280324=9280456-9280654:+	none	0.760165185493007	none	0.75750486279252	none	0.794786656300486	TRUE
ildr1a	DreINT0081213	chr1:49061-49637	577	chr1:49638-50247=48890-49060:-	none	0.824228615573421	none	0.830168967115967	none	0.770562754488257	FALSE
ildr1a	DreINT0081214	chr1:48585-48889	305	chr1:48890-49060=48435-48584:-	none	0.770647644101381	none	0.757920466290954	none	0.777970293283111	FALSE
ildr1a	DreINT0081215	chr1:48073-48434	362	chr1:48435-48584=47953-48072:-	none	0.744604271633372	none	0.81609887433499	none	0.830400465921406	FALSE
ildr1a	DreINT0081216	chr1:47808-47952	145	chr1:47953-48072=47661-47807:-	none	0.698058437004305	none	0.706708299269415	none	0.721970250505402	FALSE
ildr1a	DreINT0081217	chr1:47550-47660	111	chr1:47661-47807=47421-47549:-	none	0.731801039854381	none	0.761362948992851	none	0.827722884007708	FALSE
ildr1a	DreINT0081218	chr1:46372-47420	1049	chr1:47421-47549=45788-46371:-	none	0.74817934152757	none	0.825572595296845	none	0.823818967937483	FALSE
ildr1a	DreINT0081219	chr1:45551-45787	237	chr1:45788-46371=44839-45550:-	none	0.923572011502696	none	0.919339894718282	none	0.943270444112118	FALSE
BX530018.2	DreINT0002409	chr1:13739745-13740160	416	chr1:13740161-13740290=13739660-13739744:-	none	0.50739107964321	none	0.503759363441367	none	0.446717546685987	TRUE
BX530018.2	DreINT0002410	chr1:13739482-13739659	178	chr1:13739660-13739744=13739428-13739481:-	none	0.279605894870499	none	0.342688114947502	none	0.351259049654107	TRUE
BX530018.2	DreINT0002411	chr1:13737465-13739427	1963	chr1:13739428-13739481=13737417-13737464:-	none	0.261346996993222	none	0.27611890068613	none	0.36442508240796	TRUE
BX530018.2	DreINT0002412	chr1:13737328-13737416	89	chr1:13737417-13737464=13737198-13737327:-	none	0.659486770425679	none	0.594263342762138	none	0.586344760960066	TRUE
BX530018.2	DreINT0002413	chr1:13736120-13737197	1078	chr1:13737198-13737327=13735968-13736119:-	none	0.403841497355935	none	0.405369692184294	none	0.479183910559502	TRUE
BX530018.2	DreINT0002414	chr1:13734599-13735967	1369	chr1:13735968-13736119=13734440-13734598:-	none	0.696473464577591	none	0.699747880627306	none	0.694189808743506	TRUE
fam184b	DreINT0066408	chr1:22845498-22866800	21303	chr1:22866801-22867138=22844823-22845497:-	none	0.375971952586007	none	0.464399346764908	none	0.449546302278212	TRUE
fam184b	DreINT0066417	chr1:22842101-22844822	2722	chr1:22844823-22845497=22841965-22842100:-	none	0.232824186419503	none	0.301406946754846	none	0.333280423804359	FALSE
fam184b	DreINT0066418	chr1:22839728-22841964	2237	chr1:22841965-22842100=22839576-22839727:-	none	0.252341907593054	none	0.315359504407867	none	0.369234609001907	TRUE
fam184b	DreINT0066419	chr1:22837552-22839575	2024	chr1:22839576-22839727=22837279-22837551:-	none	0.414427786218239	none	0.488591236200916	none	0.524794070007719	TRUE
fam184b	DreINT0066420	chr1:22835976-22837278	1303	chr1:22837279-22837551=22835880-22835975:-	none	0.357746019959879	none	0.454701595545103	none	0.417369294504762	TRUE
fam184b	DreINT0066421	chr1:22834259-22835879	1621	chr1:22835880-22835975=22834079-22834258:-	none	0.383542728966302	none	0.446531205548305	none	0.401067708723366	TRUE
fam184b	DreINT0066422	chr1:22833777-22834078	302	chr1:22834079-22834258=22833670-22833776:-	none	0.536116917264393	none	0.5395565172054	none	0.700242525884313	TRUE
fam184b	DreINT0066423	chr1:22832063-22833669	1607	chr1:22833670-22833776=22831945-22832062:-	none	0.705113371177351	none	0.691554219852035	none	0.827474660626978	TRUE
fam184b	DreINT0066424	chr1:22831864-22831944	81	chr1:22831945-22832062=22831681-22831863:-	none	0.801392929978096	none	0.782025819385975	none	0.706404289777668	TRUE
fam184b	DreINT0066409	chr1:22831105-22831680	576	chr1:22831681-22831863=22830888-22831104:-	none	0.346959177584998	none	0.408416260387492	none	0.391733099632912	TRUE
fam184b	DreINT0066410	chr1:22825065-22830887	5823	chr1:22830888-22831104=22824934-22825064:-	none	0.394641946876102	none	0.466644172604141	none	0.561846336706909	TRUE
fam184b	DreINT0066411	chr1:22824848-22824933	86	chr1:22824934-22825064=22824684-22824847:-	none	0.627772272868907	none	0.596687687541781	none	0.681425792292698	TRUE
fam184b	DreINT0066412	chr1:22821198-22824683	3486	chr1:22824684-22824847=22821033-22821197:-	none	0.51784917312211	none	0.565085724079776	none	0.473938365953225	TRUE
fam184b	DreINT0066413	chr1:22819467-22821032	1566	chr1:22821033-22821197=22819358-22819466:-	none	0.268440912302127	none	0.2706153043365	none	0.502627907758726	TRUE
fam184b	DreINT0066414	chr1:22819282-22819357	76	chr1:22819358-22819466=22819177-22819281:-	none	0.529897147425148	none	0.493175313593579	none	0.625575415237346	TRUE
fam184b	DreINT0066415	chr1:22817396-22819176	1781	chr1:22819177-22819281=22817139-22817395:-	none	0.459755320267624	none	0.504981180313662	none	0.484278069881727	TRUE
fam184b	DreINT0066416	chr1:22816443-22817138	696	chr1:22817139-22817395=22815786-22816442:-	none	0.889126454134889	none	0.887709889120654	none	0.896801643843641	TRUE
CABZ01051902.1	DreINT0004399	chr1:44600538-44601233	696	chr1:44599872-44600537=44601234-44601350:+	none	0.794333012602622	none	0.782878241406118	none	0.621882741714272	TRUE
CABZ01051902.1	DreINT0004400	chr1:44601351-44603712	2362	chr1:44601234-44601350=44603713-44603878:+	none	0.0629677236130198	none	0.10262948121192	none	0.12219819557824	TRUE
CABZ01051902.1	DreINT0004401	chr1:44603879-44603981	103	chr1:44603713-44603878=44603982-44604924:+	none	0.959253445760544	none	0.944742777529826	none	0.951483708361205	TRUE
ednrba	DreINT0061208	chr1:27824944-27825575	632	chr1:27825576-27826119=27824831-27824943:-	none	0.834913602927312	none	0.778557467702161	none	0.703785288964619	TRUE
ednrba	DreINT0061209	chr1:27824745-27824830	86	chr1:27824831-27824943=27824540-27824744:-	none	0.495369695918779	none	0.454291535613527	none	0.463773466138737	TRUE
ednrba	DreINT0061210	chr1:27824367-27824539	173	chr1:27824540-27824744=27824217-27824366:-	none	0.177454001183276	none	0.186081959611686	none	0.257756593051	TRUE
ednrba	DreINT0061211	chr1:27824041-27824216	176	chr1:27824217-27824366=27823907-27824040:-	none	0.369626133375819	none	0.385962290218029	none	0.396025290202556	TRUE
ednrba	DreINT0061212	chr1:27823754-27823906	153	chr1:27823907-27824040=27823645-27823753:-	none	0.585299302448603	none	0.574540004883416	none	0.655492746247735	TRUE
ednrba	DreINT0061213	chr1:27821068-27823644	2577	chr1:27823645-27823753=27820834-27821067:-	none	0.745708202629774	none	0.759150130562505	none	0.787702048846322	TRUE
palb2	DreINT0109830	chr1:8445531-8445610	80	chr1:8445611-8446025=8445375-8445530:-	none	0.944151723069887	none	0.825285086185976	none	0.848852724360404	TRUE
palb2	DreINT0109831	chr1:8444378-8445374	997	chr1:8445375-8445530=8444295-8444377:-	none	0.452532416256592	none	0.505510707983925	none	0.500735515245772	TRUE
palb2	DreINT0109832	chr1:8444172-8444294	123	chr1:8444295-8444377=8444010-8444171:-	none	0.594164338900707	none	0.609497019922291	none	0.577955012274365	TRUE
palb2	DreINT0109833	chr1:8443926-8444009	84	chr1:8444010-8444171=8443809-8443925:-	none	0.500205905676899	none	0.467859276369948	none	0.574819538468475	TRUE
palb2	DreINT0109834	chr1:8443307-8443808	502	chr1:8443809-8443925=8443219-8443306:-	none	0.316974165327883	none	0.331426438908532	none	0.365637578642081	TRUE
palb2	DreINT0109835	chr1:8441626-8443218	1593	chr1:8443219-8443306=8441477-8441625:-	none	0.436850428690383	none	0.44355395167202	none	0.46057395569753	TRUE
palb2	DreINT0109836	chr1:8441302-8441476	175	chr1:8441477-8441625=8440912-8441301:-	none	0.797840582373927	none	0.780508797523095	none	0.848666352566407	TRUE
asna1	DreINT0034203	chr1:51505788-51508443	2656	chr1:51505640-51505787=51508444-51508592:+	none	0.722471007152987	none	0.740371030437355	none	0.790997691781821	FALSE
asna1	DreINT0034204	chr1:51508593-51511844	3252	chr1:51508444-51508592=51511845-51511995:+	none	0.437546718262243	none	0.504557041090591	none	0.699433469506307	FALSE
asna1	DreINT0034205	chr1:51511996-51512653	658	chr1:51511845-51511995=51512654-51512761:+	none	0.468966907656552	none	0.561094831352713	none	0.611893210615388	FALSE
asna1	DreINT0034206	chr1:51512762-51513139	378	chr1:51512654-51512761=51513140-51513337:+	none	0.733891010682319	none	0.776295652461162	none	0.783637975544022	FALSE
asna1	DreINT0034207	chr1:51513338-51515294	1957	chr1:51513140-51513337=51515295-51518868:+	none	0.782857732626835	none	0.808349362561793	none	0.861700849467825	FALSE
si:ch211-114l13.3	DreINT0135519	chr1:57352296-57352609	314	chr1:57352122-57352295=57352610-57352656:+	none	0.853998223190338	none	0.830559713626092	none	0.866093325286235	TRUE
si:ch211-114l13.3	DreINT0135520	chr1:57352657-57352736	80	chr1:57352610-57352656=57352737-57353267:+	none	0.994818014511692	none	0.979145375310134	none	0.987950202366655	TRUE
wfs1a	DreINT0175691	chr1:13651512-13652996	1485	chr1:13652997-13653114=13650957-13651511:-	NOT_RETAINED	0.729462357863695	NOT_RETAINED	0.738066475683925	NOT_RETAINED	0.601116206398766	FALSE
wfs1a	DreINT0175692	chr1:13645707-13650956	5250	chr1:13650957-13651511=13645630-13645706:-	NOT_RETAINED	0.400717889019696	NOT_RETAINED	0.453563587505058	NOT_RETAINED	0.447070861198091	FALSE
wfs1a	DreINT0175693	chr1:13640823-13645629	4807	chr1:13645630-13645706=13640678-13640822:-	NOT_RETAINED	0.392859771510604	NOT_RETAINED	0.456305669490682	NOT_RETAINED	0.494696915614123	FALSE
wfs1a	DreINT0175694	chr1:13640545-13640677	133	chr1:13640678-13640822=13640371-13640544:-	NOT_RETAINED	0.690153726177011	NOT_RETAINED	0.696669753915235	NOT_RETAINED	0.632500037736929	FALSE
wfs1a	DreINT0175695	chr1:13639140-13640370	1231	chr1:13640371-13640544=13639062-13639139:-	none	0.57995627955331	none	0.595466572893071	none	0.576905168879474	FALSE
wfs1a	DreINT0175696	chr1:13637724-13639061	1338	chr1:13639062-13639139=13637569-13637723:-	none	0.581295690172042	none	0.583488519542739	none	0.573349768629832	FALSE
wfs1a	DreINT0175697	chr1:13636529-13637568	1040	chr1:13637569-13637723=13636391-13636528:-	none	0.515799235026622	none	0.569508433166044	none	0.496709640294421	TRUE
wfs1a	DreINT0175698	chr1:13636269-13636390	122	chr1:13636391-13636528=13635580-13636268:-	none	0.6679645726724	none	0.601721948856248	none	0.65564328578898	FALSE
wfs1a	DreINT0175699	chr1:13628517-13635579	7063	chr1:13635580-13636268=13627138-13628516:-	none	0.94144558790533	none	0.947328217881581	none	0.932846590931562	TRUE
fgf20a	DreINT0068206	chr1:15700744-15701166	423	chr1:15701167-15701877=15700640-15700743:-	none	0.682606694672837	none	0.629572441059747	none	0.582385391605228	TRUE
fgf20a	DreINT0068207	chr1:15700432-15700639	208	chr1:15700640-15700743=15700140-15700431:-	none	0.799623946824393	none	0.799874127052828	none	0.852188785189306	TRUE
si:ch73-109d9.1	DreINT0140769	chr1:43323402-43323768	367	chr1:43323769-43323902=43323035-43323401:-	none	0.676232394767946	none	0.684543407798879	none	0.529602946346492	TRUE
si:ch73-109d9.1	DreINT0140770	chr1:43320927-43323034	2108	chr1:43323035-43323401=43320361-43320926:-	none	0.324814983002128	IR_IN_RBMX2_KD	0.427692663627215	none	0.428082203198365	FALSE
si:ch73-109d9.1	DreINT0140771	chr1:43314873-43320360	5488	chr1:43320361-43320926=43314795-43314872:-	none	0.409575094154142	none	0.418481250865611	none	0.534266431797124	TRUE
si:ch73-109d9.1	DreINT0140772	chr1:43314717-43314794	78	chr1:43314795-43314872=43314627-43314716:-	none	0.37582775983688	none	0.368812818025516	none	0.365584787166221	TRUE
si:ch73-109d9.1	DreINT0140773	chr1:43314538-43314626	89	chr1:43314627-43314716=43314433-43314537:-	none	0.590488979662355	none	0.556265209023257	none	0.624126300375753	TRUE
si:ch73-109d9.1	DreINT0140774	chr1:43310424-43314432	4009	chr1:43314433-43314537=43310308-43310423:-	none	0.746715083988296	none	0.765820372371534	none	0.810087029809975	TRUE
cab39l	DreINT0039302	chr1:45907847-45915961	8115	chr1:45907532-45907846=45915962-45916094:+	none	0.636009921006441	none	0.603612132962364	none	0.781492427683054	FALSE
cab39l	DreINT0039303	chr1:45916095-45918685	2591	chr1:45915962-45916094=45918686-45918850:+	none	0.460429782318074	none	0.520164544129529	none	0.395026089423144	FALSE
cab39l	DreINT0039304	chr1:45918851-45920371	1521	chr1:45918686-45918850=45920372-45920490:+	none	0.0608772920281631	none	0.110808938727182	none	0.136169622714605	FALSE
cab39l	DreINT0039305	chr1:45920491-45920658	168	chr1:45920372-45920490=45920659-45920827:+	none	0.748757331699015	none	0.76601984061631	none	0.773230370358386	FALSE
cab39l	DreINT0039306	chr1:45920828-45921817	990	chr1:45920659-45920827=45921818-45921877:+	none	0.0589844098529664	none	0.0945563545149106	none	0.100114117153857	FALSE
cab39l	DreINT0039307	chr1:45921878-45921965	88	chr1:45921818-45921877=45921966-45922031:+	none	0.428925651727636	none	0.412716299270855	none	0.436274339480275	FALSE
cab39l	DreINT0039308	chr1:45922032-45922122	91	chr1:45921966-45922031=45922123-45922266:+	none	0.602267837483167	none	0.610460846638677	none	0.58442471600661	FALSE
cab39l	DreINT0039309	chr1:45922267-45924210	1944	chr1:45922123-45922266=45924211-45926051:+	none	0.968742699965216	none	0.969679921901446	none	0.955456522546044	FALSE
PARD3B (2 of 2)	DreINT0015947	chr1:5370760-5387532	16773	chr1:5387533-5387972=5370658-5370759:-	none	0.480162514108475	none	0.515218921393454	none	0.56145145790137	TRUE
hand2	DreINT0076397	chr1:37474601-37474825	225	chr1:37474826-37475834=37473969-37474600:-	none	0.980562771170158	IR_IN_RBMX2_KD	0.964058761456262	none	0.950493611084764	FALSE
CABZ01030090.1	DreINT0004137	chr1:44617942-44618738	797	chr1:44618739-44618785=44617773-44617941:-	none	0.508597296724181	none	0.449577525971891	none	0.570917215180639	TRUE
CABZ01030090.1	DreINT0004138	chr1:44616687-44617772	1086	chr1:44617773-44617941=44616574-44616686:-	none	0.46735100408294	none	0.471964498601606	none	0.478130654481653	TRUE
CABZ01030090.1	DreINT0004139	chr1:44616007-44616573	567	chr1:44616574-44616686=44615875-44616006:-	none	0.401533684770345	none	0.391144202766724	none	0.440898928372826	TRUE
CABZ01030090.1	DreINT0004140	chr1:44615753-44615874	122	chr1:44615875-44616006=44615108-44615752:-	none	0.887122372145254	none	0.881592030311733	none	0.911305985783477	TRUE
agpat3	DreINT0027823	chr1:46167797-46184044	16248	chr1:46184045-46184261=46167738-46167796:-	none	0.1879804246738	none	0.215369202168613	none	0.281946420282275	TRUE
agpat3	DreINT0027824	chr1:46166051-46167737	1687	chr1:46167738-46167796=46165808-46166050:-	none	0.375333850787881	none	0.413194501293485	none	0.337858615800795	FALSE
agpat3	DreINT0027825	chr1:46163015-46165807	2793	chr1:46165808-46166050=46162845-46163014:-	none	0.718183035289765	none	0.72256581009641	none	0.797371749349098	TRUE
agpat3	DreINT0027826	chr1:46160392-46162844	2453	chr1:46162845-46163014=46160230-46160391:-	none	0.178548413949633	none	0.200860977585828	none	0.417936721584648	FALSE
cbr1	DreINT0041917	chr1:46474664-46474779	116	chr1:46474610-46474663=46474780-46475067:+	none	0.834898101373774	none	0.783676503629716	none	0.668811868934081	TRUE
cbr1	DreINT0041918	chr1:46475068-46477113	2046	chr1:46474780-46475067=46477114-46477221:+	none	0.485696302121102	none	0.519929624570709	none	0.463851807769069	TRUE
cbr1	DreINT0041919	chr1:46477222-46478580	1359	chr1:46477114-46477221=46478581-46481945:+	none	0.994878650244591	none	0.99543355947605	none	0.9909574014217	TRUE
si:ch73-380n15.2	DreINT0141826	chr1:21647731-21679793	32063	chr1:21679794-21679921=21647591-21647730:-	none	0.277994448371878	none	0.298195555009312	none	0.364892976557061	TRUE
si:ch73-380n15.2	DreINT0141827	chr1:21613983-21647590	33608	chr1:21647591-21647730=21613938-21613982:-	none	0.0642723397927851	none	0.0872605122728237	none	0.233795242372743	TRUE
si:ch73-380n15.2	DreINT0141828	chr1:21592997-21613937	20941	chr1:21613938-21613982=21592887-21592996:-	none	0.259344518796294	none	0.350020130439514	none	0.513999042477803	TRUE
cpe	DreINT0051194	chr1:20194160-20217956	23797	chr1:20217957-20218360=20193963-20194159:-	none	0.114247244341673	none	0.152221787347125	none	0.225890832829293	FALSE
cpe	DreINT0051195	chr1:20186111-20193962	7852	chr1:20193963-20194159=20185943-20186110:-	none	0.220944637398935	none	0.275949105693216	none	0.26172493050908	FALSE
cpe	DreINT0051196	chr1:20185811-20185942	132	chr1:20185943-20186110=20185693-20185810:-	none	0.476941967432786	none	0.469618434891053	none	0.48352201252837	FALSE
cpe	DreINT0051197	chr1:20185298-20185692	395	chr1:20185693-20185810=20185115-20185297:-	NOT_RETAINED	0.0500408200241432	NOT_RETAINED	0.0838108384272032	NOT_RETAINED	0.0684746819893219	FALSE
cpe	DreINT0051198	chr1:20181414-20185114	3701	chr1:20185115-20185297=20181274-20181413:-	none	0.260842972821405	none	0.292153248549097	none	0.351322131667322	FALSE
cpe	DreINT0051199	chr1:20181132-20181273	142	chr1:20181274-20181413=20181032-20181131:-	NOT_RETAINED	0.516743489726848	NOT_RETAINED	0.548796945743375	NOT_RETAINED	0.493405024786701	FALSE
cpe	DreINT0051200	chr1:20178287-20181031	2745	chr1:20181032-20181131=20178168-20178286:-	none	0.187766575426831	none	0.238413425779604	none	0.225414981798905	FALSE
cpe	DreINT0051201	chr1:20178089-20178167	79	chr1:20178168-20178286=20173921-20178088:-	none	0.999623222395914	none	0.999021143700434	none	0.998397609516421	FALSE
si:ch73-109d9.4	DreINT0140780	chr1:43352811-43357015	4205	chr1:43352477-43352810=43357016-43357167:+	none	0.622162629065096	none	0.611724785023148	none	0.557112836362102	TRUE
si:ch73-109d9.4	DreINT0140781	chr1:43357168-43358891	1724	chr1:43357016-43357167=43358892-43359003:+	none	0.497070213991217	none	0.540200632878999	none	0.511919407005715	TRUE
si:ch73-109d9.4	DreINT0140782	chr1:43359004-43360963	1960	chr1:43358892-43359003=43360964-43361045:+	none	0.647807315494646	none	0.660940845702349	none	0.757269698622622	TRUE
fscn1b	DreINT0070226	chr1:7979260-7980265	1006	chr1:7978419-7979259=7980266-7980422:+	none	0.623227100628527	none	0.637799690320039	none	0.613962703244131	TRUE
fscn1b	DreINT0070227	chr1:7980423-7983232	2810	chr1:7980266-7980422=7983233-7983354:+	none	0.344890015201782	none	0.391230612920783	none	0.380724276202746	TRUE
fscn1b	DreINT0070228	chr1:7983355-7983439	85	chr1:7983233-7983354=7983440-7983610:+	none	0.749524413696372	none	0.749184399902916	none	0.761776180044762	TRUE
fscn1b	DreINT0070229	chr1:7983611-7983885	275	chr1:7983440-7983610=7983886-7986375:+	none	0.99577295504499	none	0.995026902039296	none	0.99394198608219	TRUE
crfb17	DreINT0051990	chr1:53182834-53190717	7884	chr1:53182601-53182833=53190718-53190865:+	none	0.46375015645896	none	0.469761195348193	none	0.466215754320863	FALSE
crfb17	DreINT0051991	chr1:53190866-53193943	3078	chr1:53190718-53190865=53193944-53194113:+	none	0.525855355101346	none	0.517361772928966	none	0.550217095131577	TRUE
crfb17	DreINT0051992	chr1:53194114-53194285	172	chr1:53193944-53194113=53194286-53194431:+	none	0.567366752532216	none	0.572194523868605	none	0.533448986730937	FALSE
crfb17	DreINT0051993	chr1:53194432-53196645	2214	chr1:53194286-53194431=53196646-53196805:+	none	0.320191603537449	none	0.363079068534249	none	0.465292137426728	TRUE
crfb17	DreINT0051994	chr1:53196806-53198879	2074	chr1:53196646-53196805=53198880-53199022:+	none	0.413073994760173	none	0.453126738290165	none	0.414943619125315	TRUE
crfb17	DreINT0051995	chr1:53199023-53202715	3693	chr1:53198880-53199022=53202716-53203565:+	none	0.811568886402324	none	0.819089176695416	none	0.847842067932088	FALSE
ILDR2 (2 of 2)	DreINT0012866	chr1:63065-64756	1692	chr1:64757-65017=62717-63064:-	none	0.608262859309981	none	0.676417512259906	none	0.583264774473615	TRUE
ILDR2 (2 of 2)	DreINT0012867	chr1:61107-62716	1610	chr1:62717-63064=60987-61106:-	none	0.795141544501453	none	0.84951806337465	none	0.844705083452722	TRUE
slc5a7a	DreINT0151712	chr1:33511336-33512421	1086	chr1:33511082-33511335=33512422-33512535:+	none	0.501546132744143	none	0.506134372736268	none	0.540480405604783	TRUE
slc5a7a	DreINT0151713	chr1:33512536-33512626	91	chr1:33512422-33512535=33512627-33512782:+	none	0.572810563620931	none	0.589457868744805	none	0.593768988445214	TRUE
slc5a7a	DreINT0151714	chr1:33512783-33517355	4573	chr1:33512627-33512782=33517356-33517504:+	none	0.45804973103287	none	0.533452890091559	none	0.520489107325013	TRUE
slc5a7a	DreINT0151715	chr1:33517505-33519152	1648	chr1:33517356-33517504=33519153-33519302:+	none	0.377635539003875	none	0.464216208041895	none	0.389165209393714	TRUE
slc5a7a	DreINT0151716	chr1:33519303-33521021	1719	chr1:33519153-33519302=33521022-33521175:+	none	0.30315282172651	none	0.38100232493846	none	0.400569672186312	TRUE
slc5a7a	DreINT0151717	chr1:33521176-33523063	1888	chr1:33521022-33521175=33523064-33523281:+	none	0.394768998066127	none	0.469247627750261	none	0.492208118299745	TRUE
slc5a7a	DreINT0151718	chr1:33523282-33525470	2189	chr1:33523064-33523281=33525471-33529425:+	none	0.990353155679978	none	0.992006716314909	none	0.988389475926539	TRUE
march1	DreINT0093268	chr1:19015664-19041101	25438	chr1:19015571-19015663=19041102-19041152:+	none	0.14134657046127	none	0.175523765253737	none	0.236283317196106	TRUE
march1	DreINT0093269	chr1:19041153-19041229	77	chr1:19041102-19041152=19041230-19041309:+	none	0.709171638896318	none	0.683337837413467	none	0.598266335314993	TRUE
march1	DreINT0093270	chr1:19041310-19052280	10971	chr1:19041230-19041309=19052281-19052461:+	none	0.413588201186746	none	0.535598183184276	none	0.717441867673047	TRUE
march1	DreINT0093271	chr1:19052462-19058832	6371	chr1:19052281-19052461=19058833-19058980:+	none	0.503324328469842	none	0.613900440426645	none	0.67226504583782	TRUE
march1	DreINT0093272	chr1:19058981-19062983	4003	chr1:19058833-19058980=19062984-19063422:+	none	0.769715911551146	none	0.811438050718386	none	0.809723113081907	TRUE
atp11a	DreINT0034878	chr1:45651836-45652644	809	chr1:45652645-45652767=45651746-45651835:-	NOT_RETAINED	0.29640067379612	NOT_RETAINED	0.307002640698479	NOT_RETAINED	0.356494489429498	FALSE
atp11a	DreINT0034889	chr1:45651660-45651745	86	chr1:45651746-45651835=45651579-45651659:-	none	0.707479769546418	none	0.713795657347033	none	0.736021896291379	FALSE
atp11a	DreINT0034898	chr1:45651492-45651578	87	chr1:45651579-45651659=45651384-45651491:-	none	0.47511568917457	none	0.498894099902229	none	0.515521606890528	TRUE
atp11a	DreINT0034899	chr1:45648749-45651383	2635	chr1:45651384-45651491=45648620-45648748:-	NOT_RETAINED	0.265974035300768	NOT_RETAINED	0.326649088196407	NOT_RETAINED	0.397557757763413	FALSE
atp11a	DreINT0034900	chr1:45644811-45648619	3809	chr1:45648620-45648748=45644707-45644810:-	none	0.375767874559641	none	0.42544975906763	none	0.505643031034828	FALSE
atp11a	DreINT0034901	chr1:45644414-45644706	293	chr1:45644707-45644810=45644363-45644413:-	none	0.628177794343275	none	0.635759408914273	none	0.660455289189925	TRUE
atp11a	DreINT0034902	chr1:45643358-45644362	1005	chr1:45644363-45644413=45643293-45643357:-	none	0.40811431220862	none	0.492803074832787	none	0.456865757849381	TRUE
atp11a	DreINT0034903	chr1:45639711-45643292	3582	chr1:45643293-45643357=45639629-45639710:-	none	0.284563097074451	none	0.307438282814563	none	0.327218194152089	TRUE
atp11a	DreINT0034904	chr1:45638907-45639628	722	chr1:45639629-45639710=45638756-45638906:-	none	0.406019492195062	none	0.48372763520505	none	0.500657329479213	TRUE
atp11a	DreINT0034879	chr1:45638294-45638755	462	chr1:45638756-45638906=45638096-45638293:-	none	0.415849885693538	none	0.456098401673266	none	0.40220186087064	FALSE
atp11a	DreINT0034880	chr1:45637800-45638095	296	chr1:45638096-45638293=45637626-45637799:-	none	0.488499456283409	none	0.535747273802175	none	0.537350745168549	FALSE
atp11a	DreINT0034881	chr1:45635627-45637625	1999	chr1:45637626-45637799=45635460-45635626:-	none	0.293215095219515	none	0.386030636327987	none	0.325290871022738	FALSE
atp11a	DreINT0034882	chr1:45634872-45635459	588	chr1:45635460-45635626=45634800-45634871:-	none	0.484753064639712	none	0.504635855073699	none	0.553831992468003	TRUE
atp11a	DreINT0034883	chr1:45632510-45634799	2290	chr1:45634800-45634871=45632436-45632509:-	none	0.661557833906351	none	0.67339113879032	none	0.625769547140338	FALSE
atp11a	DreINT0034884	chr1:45628155-45632435	4281	chr1:45632436-45632509=45628051-45628154:-	none	0.390982482723116	none	0.43520623582739	none	0.502132936107678	FALSE
atp11a	DreINT0034885	chr1:45624662-45628050	3389	chr1:45628051-45628154=45624480-45624661:-	none	0.29537030292885	none	0.369217956421801	none	0.432661062103247	FALSE
atp11a	DreINT0034886	chr1:45617374-45624479	7106	chr1:45624480-45624661=45617122-45617373:-	none	0.501799313719124	none	0.550038028798772	none	0.542502208798529	TRUE
atp11a	DreINT0034887	chr1:45615899-45617121	1223	chr1:45617122-45617373=45615718-45615898:-	none	0.22020839064062	none	0.291496099182429	none	0.328462742656964	TRUE
atp11a	DreINT0034888	chr1:45611716-45615717	4002	chr1:45615718-45615898=45611613-45611715:-	none	0.290041387118194	none	0.376238955705447	none	0.444858917368945	FALSE
atp11a	DreINT0034890	chr1:45610162-45611612	1451	chr1:45611613-45611715=45610016-45610161:-	none	0.238203062817244	none	0.282877162038405	none	0.379038741092892	FALSE
atp11a	DreINT0034891	chr1:45608368-45610015	1648	chr1:45610016-45610161=45608308-45608367:-	none	0.362740227729378	none	0.422568304133461	none	0.43611500870537	FALSE
atp11a	DreINT0034892	chr1:45605817-45608307	2491	chr1:45608308-45608367=45605689-45605816:-	NOT_RETAINED	0.307226833619159	NOT_RETAINED	0.377317850744319	NOT_RETAINED	0.392647313846454	FALSE
atp11a	DreINT0034893	chr1:45602290-45605688	3399	chr1:45605689-45605816=45602154-45602289:-	none	0.355093827469855	none	0.442579064678815	none	0.441076618669259	TRUE
atp11a	DreINT0034894	chr1:45594464-45602153	7690	chr1:45602154-45602289=45594398-45594463:-	none	0.226648347957478	none	0.327971247170364	none	0.37408931004005	TRUE
atp11a	DreINT0034895	chr1:45594257-45594397	141	chr1:45594398-45594463=45594153-45594256:-	none	0.6013424479052	none	0.601358420569544	IR_IN_SNIP1_KD	0.658186049692796	FALSE
atp11a	DreINT0034896	chr1:45591663-45594152	2490	chr1:45594153-45594256=45591497-45591662:-	none	0.372307254401642	none	0.421464691938676	none	0.450684989536031	FALSE
atp11a	DreINT0034897	chr1:45584872-45591496	6625	chr1:45591497-45591662=45584794-45584871:-	none	0.518295652730905	none	0.615831751126883	none	0.762245667358747	TRUE
taf5l	DreINT0160043	chr1:53257986-53258916	931	chr1:53258917-53259096=53257844-53257985:-	none	0.548169832533517	none	0.601489056493957	none	0.530308011468952	FALSE
taf5l	DreINT0160044	chr1:53257267-53257843	577	chr1:53257844-53257985=53257162-53257266:-	none	0.441825252354719	none	0.453385169072048	none	0.341693260941431	FALSE
taf5l	DreINT0160045	chr1:53255822-53257161	1340	chr1:53257162-53257266=53255628-53255821:-	none	0.0811183134447434	none	0.161790033615326	none	0.178732495297416	TRUE
taf5l	DreINT0160046	chr1:53255288-53255627	340	chr1:53255628-53255821=53255141-53255287:-	none	0.137318973460836	none	0.172236412817638	none	0.294939048717935	FALSE
taf5l	DreINT0160047	chr1:53253630-53255140	1511	chr1:53255141-53255287=53253207-53253629:-	none	0.461548233774614	none	0.591941144646597	IR_IN_SNIP1_KD	0.511913863882011	FALSE
taf5l	DreINT0160048	chr1:53252987-53253206	220	chr1:53253207-53253629=53252091-53252986:-	none	0.977368036152057	none	0.975310554742615	none	0.973511890734348	FALSE
gpr108	DreINT0074392	chr1:58369398-58369626	229	chr1:58369261-58369397=58369627-58369702:+	none	0.790122923749251	none	0.807369117425319	none	0.70893693412946	FALSE
gpr108	DreINT0074393	chr1:58369703-58370026	324	chr1:58369627-58369702=58370027-58370100:+	none	0.506501519258141	none	0.509737055324029	none	0.63636643910021	FALSE
gpr108	DreINT0074394	chr1:58370101-58370274	174	chr1:58370027-58370100=58370275-58370392:+	none	0.639437296582852	none	0.625018495389561	none	0.710528085864331	FALSE
gpr108	DreINT0074395	chr1:58370393-58371082	690	chr1:58370275-58370392=58371083-58371213:+	none	0.409431776107315	none	0.479735874539971	none	0.483853197272743	FALSE
gpr108	DreINT0074396	chr1:58371214-58371308	95	chr1:58371083-58371213=58371309-58371352:+	none	0.558453902483038	none	0.624915087550745	none	0.63008707589881	FALSE
gpr108	DreINT0074397	chr1:58371353-58371610	258	chr1:58371309-58371352=58371611-58371660:+	none	0.436778775399478	none	0.462400605027714	none	0.589490954580485	TRUE
gpr108	DreINT0074398	chr1:58371661-58371738	78	chr1:58371611-58371660=58371739-58371822:+	none	0.575114830417334	none	0.594424914759746	none	0.542912088514263	FALSE
gpr108	DreINT0074399	chr1:58371823-58371903	81	chr1:58371739-58371822=58371904-58372025:+	none	0.468329431154749	none	0.470383586283113	none	0.509568757605771	FALSE
gpr108	DreINT0074400	chr1:58372026-58372725	700	chr1:58371904-58372025=58372726-58373910:+	none	0.883710500191997	none	0.893278416253879	none	0.892205440480918	FALSE
uchl1	DreINT0171270	chr1:21961082-21961191	110	chr1:21961192-21961685=21961070-21961081:-	none	0.907939521986597	none	0.836365886781735	none	0.859546382100312	TRUE
uchl1	DreINT0171271	chr1:21960732-21961069	338	chr1:21961070-21961081=21960603-21960731:-	none	0.515887160679971	none	0.565708451288108	none	0.486564364132538	TRUE
uchl1	DreINT0171272	chr1:21959570-21960602	1033	chr1:21960603-21960731=21959434-21959569:-	none	0.459116880438017	none	0.517709075963712	none	0.555612848557043	TRUE
uchl1	DreINT0171273	chr1:21958371-21959433	1063	chr1:21959434-21959569=21958285-21958370:-	none	0.357954085689014	none	0.363406291024147	none	0.432358362728362	FALSE
uchl1	DreINT0171274	chr1:21958029-21958284	256	chr1:21958285-21958370=21957981-21958028:-	none	0.438648517971954	none	0.441991472917582	none	0.399807877444563	FALSE
uchl1	DreINT0171275	chr1:21957888-21957980	93	chr1:21957981-21958028=21957818-21957887:-	none	0.43977029550052	none	0.452918146618806	none	0.513351707905914	FALSE
uchl1	DreINT0171276	chr1:21957712-21957817	106	chr1:21957818-21957887=21957653-21957711:-	none	0.409779513666657	none	0.433462361262099	none	0.439083271380596	FALSE
uchl1	DreINT0171277	chr1:21957473-21957652	180	chr1:21957653-21957711=21957017-21957472:-	none	0.79010940167249	none	0.798822670065015	none	0.808843594280148	FALSE
xpa	DreINT0176447	chr1:11382078-11382604	527	chr1:11382000-11382077=11382605-11382789:+	none	0.39986817818521	none	0.447096148921702	none	0.358031011915466	TRUE
xpa	DreINT0176448	chr1:11382790-11382872	83	chr1:11382605-11382789=11382873-11382983:+	none	0.561952685708559	none	0.526523689175943	none	0.571855647183554	TRUE
xpa	DreINT0176449	chr1:11382984-11384785	1802	chr1:11382873-11382983=11384786-11384891:+	none	0.457215367497986	none	0.487412081010956	none	0.550748854966835	TRUE
xpa	DreINT0176450	chr1:11384892-11385120	229	chr1:11384786-11384891=11385121-11385286:+	none	0.655023464007738	none	0.6678953254431	none	0.614881679324196	TRUE
xpa	DreINT0176451	chr1:11385287-11387588	2302	chr1:11385121-11385286=11387589-11387706:+	none	0.303533743204033	none	0.355289020887227	none	0.38134832008029	TRUE
xpa	DreINT0176452	chr1:11387707-11390213	2507	chr1:11387589-11387706=11390214-11390305:+	none	0.352197990447406	none	0.446634728998236	none	0.406309515877097	FALSE
xpa	DreINT0176453	chr1:11390306-11403655	13350	chr1:11390214-11390305=11403656-11404540:+	none	0.564130222556682	none	0.655582783296279	none	0.702049985651809	TRUE
xpa	DreINT0176454	chr1:11404541-11410966	6426	chr1:11403656-11404540=11410967-11411018:+	none	0.636816064133638	none	0.667923704910759	none	0.797383858314052	TRUE
zgc:172106	DreINT0179894	chr1:54616207-54616354	148	chr1:54615773-54616206=54616355-54616398:+	none	0.823400319487331	none	0.731844500043489	none	0.71403851851418	TRUE
zgc:172106	DreINT0179895	chr1:54616399-54619356	2958	chr1:54616355-54616398=54619357-54619695:+	none	0.534500314990078	none	0.576289903408214	none	0.551725673182926	TRUE
zgc:172106	DreINT0179896	chr1:54619696-54619778	83	chr1:54619357-54619695=54619779-54620024:+	none	0.857557810613483	none	0.794921893418004	none	0.814875839458203	TRUE
zgc:172106	DreINT0179897	chr1:54620365-54620558	194	chr1:54620101-54620364=54620559-54620637:+	none	0.729178448769548	none	0.742295350234244	none	0.731797063017995	TRUE
zgc:172106	DreINT0179898	chr1:54620638-54620711	74	chr1:54620559-54620637=54620712-54620784:+	none	0.747449513581664	none	0.717941620984129	none	0.735534428297834	TRUE
zgc:172106	DreINT0179899	chr1:54620785-54620852	68	chr1:54620712-54620784=54620853-54620924:+	none	0.682894332133288	none	0.669244555506734	none	0.669945525675093	TRUE
zgc:172106	DreINT0179900	chr1:54620925-54621005	81	chr1:54620853-54620924=54621006-54621522:+	none	0.874445951224174	none	0.831843763633903	none	0.899807633127128	TRUE
samd1b	DreINT0130617	chr1:55155697-55161297	5601	chr1:55161298-55162454=55155420-55155696:-	none	0.536978300329246	none	0.605188236459373	none	0.50814336864772	TRUE
samd1b	DreINT0130618	chr1:55149564-55155419	5856	chr1:55155420-55155696=55149481-55149563:-	none	0.335029286025673	none	0.389147347837277	none	0.484941705647712	TRUE
samd1b	DreINT0130619	chr1:55147254-55149480	2227	chr1:55149481-55149563=55147193-55147253:-	none	0.300187769587283	none	0.447848524408477	none	0.442614609389881	TRUE
samd1b	DreINT0130620	chr1:55144394-55147192	2799	chr1:55147193-55147253=55144303-55144393:-	none	0.514191003862839	none	0.55268065906554	none	0.498543468094733	TRUE
samd1b	DreINT0130621	chr1:55142524-55144302	1779	chr1:55144303-55144393=55142406-55142523:-	none	0.329091837059606	none	0.401087168757596	none	0.376185263835542	TRUE
samd1b	DreINT0130622	chr1:55140785-55142405	1621	chr1:55142406-55142523=55140002-55140784:-	none	0.843755827395657	none	0.865482032391114	none	0.884448547627251	TRUE
si:ch211-114l13.10	DreINT0135506	chr1:57231424-57233390	1967	chr1:57231149-57231423=57233391-57235191:+	none	0.957849347059275	none	0.953057532887267	none	0.921904244140544	TRUE
si:ch211-114l13.10	DreINT0135507	chr1:57235192-57235608	417	chr1:57233391-57235191=57235609-57235782:+	none	0.930469887143289	none	0.90062361322558	none	0.843302822352198	TRUE
si:ch211-114l13.10	DreINT0135508	chr1:57235783-57238946	3164	chr1:57235609-57235782=57238947-57239120:+	none	0.86073583916964	none	0.894675549539058	none	0.884010951470907	TRUE
si:ch211-114l13.10	DreINT0135509	chr1:57239121-57239206	86	chr1:57238947-57239120=57239207-57239377:+	none	0.73616836127756	none	0.68171066089178	none	0.706577876808201	TRUE
si:ch211-114l13.10	DreINT0135510	chr1:57239378-57239463	86	chr1:57239207-57239377=57239464-57239637:+	none	0.604481463292683	none	0.585256111311797	none	0.635667616858201	TRUE
si:ch211-114l13.10	DreINT0135511	chr1:57239638-57240466	829	chr1:57239464-57239637=57240467-57240513:+	none	0.508382878185454	none	0.553202793472134	none	0.511857558764271	TRUE
si:ch211-114l13.10	DreINT0135512	chr1:57240514-57240600	87	chr1:57240467-57240513=57240601-57244379:+	none	0.99921270159572	none	0.998300784294347	none	0.997432312559718	TRUE
helt	DreINT0077330	chr1:16900675-16901200	526	chr1:16900455-16900674=16901201-16901305:+	none	0.609275313689442	none	0.650224378811725	none	0.569808300486666	TRUE
helt	DreINT0077331	chr1:16901306-16901387	82	chr1:16901201-16901305=16901388-16901484:+	none	0.543378723896032	none	0.521428663545589	none	0.519237144265926	TRUE
helt	DreINT0077332	chr1:16901485-16901579	95	chr1:16901388-16901484=16901580-16902108:+	none	0.90640251720807	none	0.886958610460419	none	0.852718546044017	TRUE
adra1d	DreINT0027280	chr1:41260445-41280174	19730	chr1:41280175-41281418=41256046-41260444:-	none	0.998609816899386	none	0.998696577306505	none	0.996343575292768	TRUE
si:dkey-1c7.1	DreINT0143712	chr1:57001906-57002170	265	chr1:57001857-57001905=57002171-57002488:+	none	0.70196945782173	none	0.693977162892674	none	0.62903374254685	TRUE
si:dkey-1c7.1	DreINT0143713	chr1:57002489-57002735	247	chr1:57002171-57002488=57002736-57002810:+	none	0.781893026849529	none	0.806601421538495	none	0.705668432196863	TRUE
si:ch211-286b5.5	DreINT0140064	chr1:54589193-54593173	3981	chr1:54593174-54593315=54589057-54589192:-	none	0.35838210952762	none	0.408606222155268	none	0.345224680797957	FALSE
si:ch211-286b5.5	DreINT0140065	chr1:54587006-54589056	2051	chr1:54589057-54589192=54586374-54587005:-	none	0.607718978959407	none	0.671178987572318	none	0.874805182241237	TRUE
CD200 (3 of 5)	DreINT0006212	chr1:9963063-9963154	92	chr1:9963155-9963196=9962730-9963062:-	none	0.776354791897944	none	0.70613995794226	none	0.677414733863468	TRUE
CD200 (3 of 5)	DreINT0006213	chr1:9959526-9961137	1612	chr1:9961138-9961443=9959430-9959525:-	none	0.861019056526308	none	0.855939688226073	none	0.871507665320849	TRUE
limch1a	DreINT0089199	chr1:18273135-18304547	31413	chr1:18272813-18273134=18304548-18304618:+	none	0.0865517516486414	none	0.137111225058721	none	0.239508121359939	FALSE
limch1a	DreINT0089210	chr1:18304619-18305609	991	chr1:18304548-18304618=18305610-18305679:+	none	0.242444463353518	none	0.298553550178305	none	0.306947317251011	FALSE
limch1a	DreINT0089213	chr1:18305680-18306076	397	chr1:18305610-18305679=18306077-18306183:+	NOT_RETAINED	0.392713554412303	NOT_RETAINED	0.460272063224559	NOT_RETAINED	0.468795373240346	FALSE
limch1a	DreINT0089214	chr1:18306184-18309017	2834	chr1:18306077-18306183=18309018-18309048:+	none	0.364026276038454	none	0.364476727839735	none	0.478946053032311	FALSE
limch1a	DreINT0089215	chr1:18309049-18309130	82	chr1:18309018-18309048=18309131-18309241:+	none	0.622554740908041	none	0.60349939219503	none	0.585746249953905	FALSE
limch1a	DreINT0089216	chr1:18309242-18309320	79	chr1:18309131-18309241=18309321-18309522:+	none	0.721053743474776	none	0.699539728528125	none	0.664327833156273	FALSE
limch1a	DreINT0089217	chr1:18309523-18314224	4702	chr1:18309321-18309522=18314225-18314456:+	NOT_RETAINED	0.37732422350689	NOT_RETAINED	0.425266361929498	NOT_RETAINED	0.402954740728152	FALSE
limch1a	DreINT0089218	chr1:18314457-18341420	26964	chr1:18314225-18314456=18341421-18341553:+	none	0.0517892891956806	none	0.0948726513268835	none	0.230651326673729	TRUE
limch1a	DreINT0089219	chr1:18341554-18341640	87	chr1:18341421-18341553=18341641-18341798:+	none	0.790989223147149	none	0.809955345948806	none	0.785244815558795	FALSE
limch1a	DreINT0089200	chr1:18341799-18343381	1583	chr1:18341641-18341798=18343382-18343853:+	none	0.183573462320117	none	0.235151605829783	none	0.288856573512868	FALSE
limch1a	DreINT0089201	chr1:18343854-18353393	9540	chr1:18343382-18343853=18353394-18353700:+	none	0.477554375957065	none	0.574760564566435	none	0.578477856935972	FALSE
limch1a	DreINT0089202	chr1:18353701-18354720	1020	chr1:18353394-18353700=18354721-18354839:+	NOT_RETAINED	0.425120512121215	NOT_RETAINED	0.452298259298766	NOT_RETAINED	0.422613820922534	FALSE
limch1a	DreINT0089203	chr1:18354840-18362517	7678	chr1:18354721-18354839=18362518-18362631:+	none	0.219688123835257	none	0.292053801235602	none	0.425449367189658	TRUE
limch1a	DreINT0089204	chr1:18362632-18365536	2905	chr1:18362518-18362631=18365537-18365629:+	none	0.339192940203944	none	0.404830316307795	none	0.45312752867268	FALSE
limch1a	DreINT0089205	chr1:18365630-18365700	71	chr1:18365537-18365629=18365701-18365906:+	none	0.516137435333074	none	0.491064494089529	none	0.538593441313015	FALSE
limch1a	DreINT0089206	chr1:18365907-18367292	1386	chr1:18365701-18365906=18367293-18367390:+	none	0.395324022131791	none	0.509237601459867	none	0.51586107909137	FALSE
limch1a	DreINT0089207	chr1:18367391-18368493	1103	chr1:18367293-18367390=18368494-18368602:+	none	0.197925763492753	none	0.261420207093829	none	0.232004949511754	FALSE
limch1a	DreINT0089208	chr1:18368603-18368841	239	chr1:18368494-18368602=18368842-18368928:+	none	0.628576577989202	none	0.711931807089644	none	0.671363400268599	FALSE
limch1a	DreINT0089209	chr1:18368929-18372573	3645	chr1:18368842-18368928=18372574-18372682:+	none	0.26523966185117	none	0.395788845323668	none	0.387968225297073	FALSE
limch1a	DreINT0089211	chr1:18372683-18372753	71	chr1:18372574-18372682=18372754-18372856:+	none	0.654377802119974	none	0.619798736443329	none	0.657496744078609	FALSE
limch1a	DreINT0089212	chr1:18372857-18373190	334	chr1:18372754-18372856=18373191-18373390:+	none	0.47381124153924	none	0.499431526564898	none	0.567735831644491	FALSE
gpm6ba	DreINT0074326	chr1:28182776-28241270	58495	chr1:28241271-28241594=28182589-28182775:-	none	0.0184330136195667	none	0.0312883970153277	none	0.0928051411329248	TRUE
gpm6ba	DreINT0074327	chr1:28175402-28182588	7187	chr1:28182589-28182775=28175245-28175401:-	none	0.2066353852152	none	0.218407759692584	none	0.291793168406914	FALSE
gpm6ba	DreINT0074328	chr1:28161275-28175244	13970	chr1:28175245-28175401=28161106-28161274:-	none	0.176263756506393	none	0.195455009255361	none	0.323141509592435	TRUE
gpm6ba	DreINT0074329	chr1:28160878-28161105	228	chr1:28161106-28161274=28160804-28160877:-	none	0.237033041099219	none	0.271085516186702	none	0.294069549575253	TRUE
gpm6ba	DreINT0074330	chr1:28160187-28160803	617	chr1:28160804-28160877=28160121-28160186:-	none	0.373257334065875	none	0.369308466243233	none	0.369229875065372	FALSE
gpm6ba	DreINT0074331	chr1:28159152-28160120	969	chr1:28160121-28160186=28157821-28159151:-	none	0.728499783707172	none	0.716830262090749	none	0.791204874667098	TRUE
hpgd	DreINT0078901	chr1:37695663-37695851	189	chr1:37695852-37695980=37695539-37695662:-	none	0.511687556317343	none	0.490665412778023	none	0.580452932469499	FALSE
hpgd	DreINT0078902	chr1:37694197-37695538	1342	chr1:37695539-37695662=37694090-37694196:-	none	0.516753095691739	none	0.492147411143072	none	0.560202354850626	TRUE
hpgd	DreINT0078903	chr1:37693712-37694089	378	chr1:37694090-37694196=37693615-37693711:-	none	0.614613729949843	none	0.61876725016638	none	0.541198271459957	TRUE
hpgd	DreINT0078904	chr1:37683790-37693614	9825	chr1:37693615-37693711=37683713-37683789:-	none	0.210679205699503	none	0.251547286176067	none	0.294798748169393	FALSE
hpgd	DreINT0078905	chr1:37683472-37683712	241	chr1:37683713-37683789=37683308-37683471:-	none	0.651340126296654	none	0.698926828326262	none	0.712046472455152	TRUE
hpgd	DreINT0078906	chr1:37680052-37683307	3256	chr1:37683308-37683471=37679518-37680051:-	none	0.793638886369998	none	0.796025301816086	none	0.849515925835714	FALSE
cx41.8	DreINT0053792	chr1:46725625-46739543	13919	chr1:46739544-46740221=46723502-46725624:-	none	0.967535532511892	none	0.970341147690247	none	0.938116684479956	TRUE
creb1a	DreINT0051813	chr1:32823828-32825167	1340	chr1:32825168-32825347=32823729-32823827:-	none	0.41733171416675	none	0.456291329388515	none	0.391940700812562	FALSE
creb1a	DreINT0051814	chr1:32823575-32823728	154	chr1:32823729-32823827=32823428-32823574:-	none	0.42626353209796	none	0.472807106736271	none	0.420847777149523	FALSE
creb1a	DreINT0051815	chr1:32823219-32823427	209	chr1:32823428-32823574=32823118-32823218:-	none	0.312268425613625	none	0.304357604822837	none	0.364209220830881	FALSE
creb1a	DreINT0051816	chr1:32821805-32823117	1313	chr1:32823118-32823218=32821665-32821804:-	none	0.383253000186444	none	0.406812164754166	none	0.373447596290139	FALSE
creb1a	DreINT0051817	chr1:32821122-32821664	543	chr1:32821665-32821804=32820939-32821121:-	none	0.247390392836294	none	0.303555625370919	none	0.264259921276762	FALSE
creb1a	DreINT0051818	chr1:32817374-32820938	3565	chr1:32820939-32821121=32817223-32817373:-	none	0.173581746982615	none	0.236954976030731	none	0.258613335518661	TRUE
creb1a	DreINT0051819	chr1:32815986-32817222	1237	chr1:32817223-32817373=32814964-32815985:-	none	0.652829309178968	none	0.740510225991055	IR_IN_SNIP1_KD	0.762829697504717	FALSE
si:dkey-9i23.5	DreINT0147292	chr1:44079772-44081194	1423	chr1:44079699-44079771=44081195-44081337:+	none	0.425500701118851	none	0.46480644538576	none	0.437497093750842	TRUE
si:dkey-9i23.5	DreINT0147293	chr1:44081338-44081445	108	chr1:44081195-44081337=44081446-44081586:+	none	0.539225033356275	none	0.500364067185332	none	0.625311060824032	TRUE
si:dkey-9i23.5	DreINT0147294	chr1:44081587-44081678	92	chr1:44081446-44081586=44081679-44081793:+	none	0.572130915151614	none	0.537638137297972	none	0.549574999583624	TRUE
si:dkey-9i23.5	DreINT0147295	chr1:44081794-44081949	156	chr1:44081679-44081793=44081950-44082255:+	none	0.8442401879131	none	0.858762820439173	none	0.864548906544364	TRUE
adamts5	DreINT0026330	chr1:706306-718541	12236	chr1:718542-719733=706173-706305:-	none	0.517547725410253	none	0.575524652643813	none	0.630770072067604	TRUE
adamts5	DreINT0026331	chr1:705604-706172	569	chr1:706173-706305=705436-705603:-	none	0.582122678545728	none	0.648028518203379	none	0.647579054497202	TRUE
adamts5	DreINT0026332	chr1:705226-705435	210	chr1:705436-705603=704942-705225:-	none	0.51884006595868	none	0.592038962255271	none	0.60520840071802	TRUE
adamts5	DreINT0026333	chr1:701436-704941	3506	chr1:704942-705225=701252-701435:-	none	0.35273444655479	none	0.441377395006923	none	0.525406317633265	TRUE
adamts5	DreINT0026334	chr1:700305-701251	947	chr1:701252-701435=700129-700304:-	none	0.507124198759194	none	0.580757966375783	none	0.59483901139091	TRUE
adamts5	DreINT0026335	chr1:699658-700128	471	chr1:700129-700304=699482-699657:-	none	0.32556993712582	none	0.418755415495337	none	0.48398368102789	TRUE
adamts5	DreINT0026336	chr1:697346-699481	2136	chr1:699482-699657=696360-697345:-	none	0.864310228129733	none	0.894927211530182	none	0.907100862705848	TRUE
si:dkeyp-75b4.8	DreINT0148012	chr1:9282297-9284965	2669	chr1:9282273-9282296=9284966-9285122:+	none	0.64959418224088	none	0.675891464009799	none	0.566630468198065	TRUE
si:dkeyp-75b4.8	DreINT0148013	chr1:9285123-9285210	88	chr1:9284966-9285122=9285211-9285315:+	none	0.715903069054649	none	0.662618648185127	none	0.674577351764257	TRUE
si:dkeyp-75b4.8	DreINT0148014	chr1:9297699-9297800	102	chr1:9297509-9297698=9297801-9298003:+	none	0.940267802787283	none	0.917251348249815	none	0.937756136991555	TRUE
ccsapa	DreINT0043231	chr1:53294675-53295218	544	chr1:53294487-53294674=53295219-53295598:+	none	0.692010015498267	none	0.677862871817235	none	0.585864028254504	TRUE
ccsapa	DreINT0043232	chr1:53295599-53298319	2721	chr1:53295219-53295598=53298320-53298374:+	none	0.63819429923392	none	0.685897557086931	none	0.611685216789091	TRUE
ccsapa	DreINT0043233	chr1:53298375-53302470	4096	chr1:53298320-53298374=53302471-53304190:+	none	0.650123339789115	none	0.746720244035972	none	0.859751750014327	TRUE
neurl1aa	DreINT0103918	chr1:47057010-47080339	23330	chr1:47080340-47080510=47056768-47057009:-	none	0.125815902081299	none	0.189825065128263	none	0.288556005802283	TRUE
neurl1aa	DreINT0103919	chr1:47050289-47056767	6479	chr1:47056768-47057009=47049967-47050288:-	none	0.219701369013766	none	0.335911995899892	none	0.357913059350653	TRUE
neurl1aa	DreINT0103920	chr1:47025496-47049966	24471	chr1:47049967-47050288=47024800-47025495:-	none	0.173426143192402	none	0.260498998847829	none	0.358295816434419	TRUE
neurl1aa	DreINT0103921	chr1:47015629-47024799	9171	chr1:47024800-47025495=47015488-47015628:-	none	0.279600147048509	none	0.365228207313103	none	0.386766349829405	TRUE
pld6	DreINT0115606	chr1:51574776-51576331	1556	chr1:51576332-51576825=51574588-51574775:-	none	0.634404747947792	none	0.561448678847239	none	0.548085791961738	TRUE
pld6	DreINT0115607	chr1:51572364-51574587	2224	chr1:51574588-51574775=51572140-51572363:-	none	0.405952966648809	none	0.478385443540184	none	0.539547622790755	TRUE
pld6	DreINT0115608	chr1:51569689-51572139	2451	chr1:51572140-51572363=51568884-51569688:-	none	0.859572943124767	none	0.873827290850144	none	0.900649474352836	TRUE
si:ch211-1f22.4	DreINT0137640	chr1:56101010-56101350	341	chr1:56100764-56101009=56101351-56101608:+	none	0.680077269935569	none	0.680420281882287	none	0.721783112308236	TRUE
si:ch211-114l13.4	DreINT0135521	chr1:57330528-57332107	1580	chr1:57330427-57330527=57332108-57332254:+	none	0.643203370378571	none	0.648851523255463	none	0.562915911972918	TRUE
si:ch211-114l13.4	DreINT0135522	chr1:57332255-57332520	266	chr1:57332108-57332254=57332521-57334392:+	none	0.921716783510368	none	0.917129725163935	none	0.830988371750113	TRUE
si:ch211-114l13.4	DreINT0135523	chr1:57334905-57340046	5142	chr1:57334731-57334904=57340047-57340093:+	none	0.833526369955217	none	0.861393036207373	none	0.865897493297726	TRUE
si:ch211-114l13.4	DreINT0135524	chr1:57340094-57340494	401	chr1:57340047-57340093=57340495-57341034:+	none	0.883132714079656	none	0.854961379183983	none	0.881023246743627	TRUE
C1H3orf70 (2 of 2)	DreINT0003124	chr1:29544098-29562444	18347	chr1:29562445-29562893=29539783-29544097:-	none	0.997596580570122	none	0.998417292373739	none	0.99404524088858	TRUE
chst10	DreINT0046825	chr1:27338205-27341756	3552	chr1:27337983-27338204=27341757-27341884:+	IR_IN_BUD13_KD_F2NEW	0.469945779748419	IR_IN_RBMX2_KD	0.454223261635832	IR_IN_SNIP1_KD	0.488380006190691	FALSE
chst10	DreINT0046826	chr1:27341885-27342067	183	chr1:27341757-27341884=27342068-27342174:+	none	0.420107427480956	none	0.466218132661441	none	0.431012229030203	FALSE
chst10	DreINT0046827	chr1:27342175-27342285	111	chr1:27342068-27342174=27342286-27342520:+	none	0.751148583829634	IR_IN_RBMX2_KD	0.713347339697749	none	0.763039477558591	FALSE
chst10	DreINT0046828	chr1:27342521-27342686	166	chr1:27342286-27342520=27342687-27342792:+	none	0.670550347141142	none	0.644844901392374	none	0.703656059111309	FALSE
chst10	DreINT0046829	chr1:27342793-27352092	9300	chr1:27342687-27342792=27352093-27353092:+	none	0.579782742798466	none	0.637575003712101	none	0.735949940500935	FALSE
CCDC86	DreINT0006135	chr1:51821271-51825935	4665	chr1:51825936-51826584=51821141-51821270:-	none	0.558985830516617	none	0.583787447642471	none	0.471799065558665	FALSE
CCDC86	DreINT0006136	chr1:51820411-51821140	730	chr1:51821141-51821270=51820336-51820410:-	none	0.196123324896328	none	0.219433281670708	none	0.355399107567294	FALSE
CCDC86	DreINT0006137	chr1:51817630-51820335	2706	chr1:51820336-51820410=51817272-51817629:-	none	0.704956702282684	none	0.688852838562532	none	0.803697994708233	FALSE
cldng	DreINT0047476	chr1:32913401-32914451	1051	chr1:32914452-32914601=32912476-32913400:-	none	0.941405603566983	none	0.938052483133197	none	0.951222075572581	TRUE
si:ch73-243e13.1	DreINT0141326	chr1:3811324-3823895	12572	chr1:3823896-3823985=3810910-3811323:-	none	0.765448114184715	none	0.766943668138964	none	0.751518867265442	TRUE
prkacab	DreINT0119628	chr1:55183426-55195057	11632	chr1:55195058-55195527=55183364-55183425:-	none	0.311160206333812	none	0.338838149686048	none	0.416273599942342	FALSE
prkacab	DreINT0119629	chr1:55180538-55183363	2826	chr1:55183364-55183425=55180409-55180537:-	none	0.296413805830971	none	0.400914717665567	none	0.329232710394311	TRUE
prkacab	DreINT0119630	chr1:55177715-55180408	2694	chr1:55180409-55180537=55177616-55177714:-	none	0.500967706304608	none	0.563565053754834	none	0.576454775027453	FALSE
prkacab	DreINT0119631	chr1:55177529-55177615	87	chr1:55177616-55177714=55177446-55177528:-	IR_IN_BUD13_KD_F2NEW	0.705132389916215	IR_IN_RBMX2_KD	0.732151426501712	IR_IN_SNIP1_KD	0.716728409545533	FALSE
prkacab	DreINT0119632	chr1:55175751-55177445	1695	chr1:55177446-55177528=55175624-55175750:-	none	0.499965994761367	none	0.511520435375568	none	0.577338863159827	TRUE
prkacab	DreINT0119633	chr1:55174380-55175623	1244	chr1:55175624-55175750=55174284-55174379:-	none	0.19683016572234	none	0.270574105521013	none	0.269777491198187	FALSE
prkacab	DreINT0119634	chr1:55171869-55174283	2415	chr1:55174284-55174379=55171746-55171868:-	none	0.253568929918816	none	0.313614288840753	none	0.39009335799528	FALSE
prkacab	DreINT0119635	chr1:55169963-55171745	1783	chr1:55171746-55171868=55169798-55169962:-	none	0.226652857403647	none	0.307269781562315	none	0.322658990301413	FALSE
prkacab	DreINT0119636	chr1:55167213-55169797	2585	chr1:55169798-55169962=55165901-55167212:-	none	0.885523302667389	none	0.922263234712238	none	0.904684010967597	FALSE
slc25a23a	DreINT0149973	chr1:54310656-54319466	8811	chr1:54319467-54320095=54310529-54310655:-	none	0.522285652914179	none	0.558467450645722	none	0.653189545092947	TRUE
slc25a23a	DreINT0149974	chr1:54309959-54310528	570	chr1:54310529-54310655=54309871-54309958:-	none	0.519311955174918	none	0.529174473867202	none	0.53550023586224	FALSE
slc25a23a	DreINT0149975	chr1:54309368-54309870	503	chr1:54309871-54309958=54309256-54309367:-	none	0.300072713261847	none	0.376604862329302	none	0.402459262339689	FALSE
slc25a23a	DreINT0149976	chr1:54307780-54309255	1476	chr1:54309256-54309367=54307621-54307779:-	none	0.266793291912888	none	0.369984408443114	none	0.30572948458172	FALSE
slc25a23a	DreINT0149977	chr1:54306948-54307620	673	chr1:54307621-54307779=54306795-54306947:-	none	0.270605065960516	none	0.319938862008183	none	0.363691434218202	FALSE
slc25a23a	DreINT0149978	chr1:54306594-54306794	201	chr1:54306795-54306947=54306480-54306593:-	none	0.703986027542098	none	0.701874892949795	none	0.732994758034097	FALSE
slc25a23a	DreINT0149979	chr1:54304064-54306479	2416	chr1:54306480-54306593=54303896-54304063:-	none	0.313143296982133	none	0.382826587992949	none	0.4157212702477	FALSE
slc25a23a	DreINT0149980	chr1:54303460-54303895	436	chr1:54303896-54304063=54303309-54303459:-	none	0.330397883176379	none	0.395877667735895	none	0.453847144670646	FALSE
slc25a23a	DreINT0149981	chr1:54301091-54303308	2218	chr1:54303309-54303459=54296540-54301090:-	none	0.963736390639235	none	0.97155467374302	none	0.964068112357586	TRUE
tmem192	DreINT0164645	chr1:18956716-18957278	563	chr1:18956608-18956715=18957279-18957431:+	none	0.698801581243503	none	0.666418332609681	none	0.666961818180652	TRUE
tmem192	DreINT0164646	chr1:18957432-18959133	1702	chr1:18957279-18957431=18959134-18959395:+	none	0.418944012285833	none	0.454445465998579	none	0.428517258063483	TRUE
tmem192	DreINT0164647	chr1:18959396-18960859	1464	chr1:18959134-18959395=18960860-18960997:+	none	0.423027569437605	none	0.468382460725108	none	0.506282679813112	TRUE
tmem192	DreINT0164648	chr1:18960998-18970971	9974	chr1:18960860-18960997=18970972-18971074:+	none	0.238255479001281	none	0.319203633058329	none	0.355491875045614	TRUE
tmem192	DreINT0164649	chr1:18971075-18971966	892	chr1:18970972-18971074=18971967-18972837:+	none	0.945289587797383	none	0.952679856326643	none	0.949716265843906	FALSE
rnf38	DreINT0128011	chr1:18170249-18174490	4242	chr1:18170123-18170248=18174491-18175100:+	none	0.563931394573349	none	0.568854344681864	none	0.515737004623391	TRUE
rnf38	DreINT0128015	chr1:18175101-18201675	26575	chr1:18174491-18175100=18201676-18201737:+	none	0.064902146064158	none	0.10798271909819	none	0.1471613986921	FALSE
rnf38	DreINT0128016	chr1:18201738-18227293	25556	chr1:18201676-18201737=18227294-18227487:+	none	0.0393859790745833	none	0.067054455297521	none	0.118536900747803	FALSE
rnf38	DreINT0128017	chr1:18227488-18228553	1066	chr1:18227294-18227487=18228554-18228809:+	none	0.0555218591554915	none	0.0928249197429556	none	0.0888314167399106	FALSE
rnf38	DreINT0128018	chr1:18228810-18230727	1918	chr1:18228554-18228809=18230728-18230907:+	none	0.201024488239635	none	0.263978268241486	none	0.390075207806682	FALSE
rnf38	DreINT0128019	chr1:18230908-18231282	375	chr1:18230728-18230907=18231283-18231441:+	none	0.184569176945682	none	0.275496409483592	none	0.22526750703905	FALSE
rnf38	DreINT0128020	chr1:18231442-18233117	1676	chr1:18231283-18231441=18233118-18233279:+	none	0.248765003896259	none	0.274175374358509	none	0.330571695077592	FALSE
rnf38	DreINT0128021	chr1:18233280-18233366	87	chr1:18233118-18233279=18233367-18233470:+	none	0.541367568127716	none	0.552253838292013	none	0.498911030664492	FALSE
rnf38	DreINT0128022	chr1:18233471-18235461	1991	chr1:18233367-18233470=18235462-18235549:+	none	0.203397856487823	none	0.23451436675278	none	0.341616947592739	FALSE
rnf38	DreINT0128012	chr1:18235550-18235649	100	chr1:18235462-18235549=18235650-18235771:+	none	0.554546250804118	none	0.530556609776572	none	0.515342328306764	FALSE
rnf38	DreINT0128013	chr1:18235772-18236756	985	chr1:18235650-18235771=18236757-18236856:+	none	0.214117192144904	none	0.238551924539738	none	0.294960042514526	FALSE
rnf38	DreINT0128014	chr1:18236857-18240072	3216	chr1:18236757-18236856=18240073-18240734:+	none	0.635483828004698	none	0.637470393102979	none	0.704061730047349	TRUE
cacna1hb	DreINT0039829	chr1:7630875-7641643	10769	chr1:7630715-7630874=7641644-7641956:+	none	0.371945771973615	none	0.389284169246977	none	0.46912425809326	TRUE
cacna1hb	DreINT0039840	chr1:7641957-7649950	7994	chr1:7641644-7641956=7649951-7650043:+	none	0.391547368870021	none	0.439596025893627	none	0.493407861465322	TRUE
cacna1hb	DreINT0039848	chr1:7650044-7652068	2025	chr1:7649951-7650043=7652069-7652406:+	none	0.438004179735216	none	0.522455243314045	none	0.420669033353178	TRUE
cacna1hb	DreINT0039849	chr1:7652407-7657022	4616	chr1:7652069-7652406=7657023-7657332:+	none	0.460556510609601	none	0.584962302905751	none	0.623559913061129	TRUE
cacna1hb	DreINT0039850	chr1:7657333-7662656	5324	chr1:7657023-7657332=7662657-7662808:+	none	0.411126266941476	none	0.496240019456007	none	0.539596953338071	TRUE
cacna1hb	DreINT0039851	chr1:7662809-7666142	3334	chr1:7662657-7662808=7666143-7666328:+	none	0.432963908916638	none	0.529933377516178	none	0.478608239494129	TRUE
cacna1hb	DreINT0039852	chr1:7666329-7668664	2336	chr1:7666143-7666328=7668665-7668782:+	none	0.33586820977814	none	0.372464190985346	none	0.512516390313193	TRUE
cacna1hb	DreINT0039853	chr1:7668783-7674666	5884	chr1:7668665-7668782=7674667-7674822:+	none	0.262235697360809	none	0.307108622588691	none	0.37523646589149	TRUE
cacna1hb	DreINT0039854	chr1:7674823-7685190	10368	chr1:7674667-7674822=7685191-7685291:+	none	0.221633854622801	none	0.308504096867161	none	0.336704754933476	TRUE
cacna1hb	DreINT0039830	chr1:7685292-7685386	95	chr1:7685191-7685291=7685387-7685510:+	none	0.732060670128399	none	0.727942990754474	none	0.761830774011457	TRUE
cacna1hb	DreINT0039831	chr1:7685511-7685744	234	chr1:7685387-7685510=7685745-7685813:+	none	0.334523432731079	none	0.370137421705235	none	0.453308163928784	TRUE
cacna1hb	DreINT0039832	chr1:7685814-7689118	3305	chr1:7685745-7685813=7689119-7689303:+	none	0.332005467431383	none	0.423371119942744	none	0.412985270353638	TRUE
cacna1hb	DreINT0039833	chr1:7689304-7691945	2642	chr1:7689119-7689303=7691946-7692072:+	none	0.390705577925831	none	0.469344705751746	none	0.479840372504566	TRUE
cacna1hb	DreINT0039834	chr1:7692073-7692211	139	chr1:7691946-7692072=7692212-7692337:+	none	0.514816380833702	none	0.569424226536255	none	0.572554825043253	TRUE
cacna1hb	DreINT0039835	chr1:7692338-7694824	2487	chr1:7692212-7692337=7694825-7694914:+	none	0.386022265694883	none	0.493021192474206	none	0.471625132211135	TRUE
cacna1hb	DreINT0039836	chr1:7694915-7699072	4158	chr1:7694825-7694914=7699073-7699265:+	none	0.344048508341828	none	0.410537394240972	none	0.489801029394063	TRUE
cacna1hb	DreINT0039837	chr1:7699266-7703412	4147	chr1:7699073-7699265=7703413-7703564:+	none	0.468559929390968	none	0.546400714250582	none	0.560084520190404	TRUE
cacna1hb	DreINT0039838	chr1:7703565-7704896	1332	chr1:7703413-7703564=7704897-7705006:+	none	0.287337207551083	none	0.3159741625404	none	0.427015628004778	TRUE
cacna1hb	DreINT0039839	chr1:7705007-7708005	2999	chr1:7704897-7705006=7708006-7708139:+	none	0.379375678594698	none	0.463656876101885	none	0.499852845324079	TRUE
cacna1hb	DreINT0039841	chr1:7708140-7709004	865	chr1:7708006-7708139=7709005-7709075:+	none	0.325914660810171	none	0.388646821196458	none	0.405116672242119	TRUE
cacna1hb	DreINT0039842	chr1:7709076-7710392	1317	chr1:7709005-7709075=7710393-7710471:+	none	0.311946421412392	none	0.35639730083257	none	0.391762048115548	TRUE
cacna1hb	DreINT0039843	chr1:7710472-7711934	1463	chr1:7710393-7710471=7711935-7712056:+	none	0.332263877325934	none	0.393180027613865	none	0.392695085863761	TRUE
cacna1hb	DreINT0039844	chr1:7712057-7713835	1779	chr1:7711935-7712056=7713836-7714129:+	none	0.443225768026611	none	0.495760177368942	none	0.534420587083103	TRUE
cacna1hb	DreINT0039845	chr1:7714130-7716989	2860	chr1:7713836-7714129=7716990-7717146:+	none	0.515051630655552	none	0.541823098941196	none	0.525606750312088	TRUE
cacna1hb	DreINT0039846	chr1:7717147-7717230	84	chr1:7716990-7717146=7717231-7717388:+	none	0.740747132020457	none	0.762392670118605	none	0.759529432744413	TRUE
cacna1hb	DreINT0039847	chr1:7717389-7718967	1579	chr1:7717231-7717388=7718968-7719894:+	none	0.733619256599791	none	0.81114935796549	none	0.794895535087256	TRUE
si:ch211-190d13.1	DreINT0137212	chr1:7016783-7018268	1486	chr1:7018269-7018404=7016590-7016782:-	none	0.833544428475417	none	0.788460098430947	none	0.846720984759563	TRUE
pspc1	DreINT0121351	chr1:27132580-27132667	88	chr1:27132266-27132579=27132668-27132763:+	none	0.648281388835745	none	0.516772590239337	none	0.573954796144811	FALSE
pspc1	DreINT0121352	chr1:27132764-27132879	116	chr1:27132668-27132763=27132880-27133076:+	none	0.471939187999366	none	0.42986729001573	none	0.381678047633473	FALSE
pspc1	DreINT0121353	chr1:27133077-27133346	270	chr1:27132880-27133076=27133347-27133431:+	none	0.318999684466899	none	0.323504276647091	none	0.317280445222323	FALSE
pspc1	DreINT0121354	chr1:27133432-27148567	15136	chr1:27133347-27133431=27148568-27148673:+	none	0.163975868799662	none	0.216092416943087	none	0.253945780024172	FALSE
pspc1	DreINT0121355	chr1:27148674-27164024	15351	chr1:27148568-27148673=27164025-27164082:+	none	0.186235622265748	none	0.249722442136522	none	0.318591418384765	FALSE
pspc1	DreINT0121356	chr1:27164083-27165353	1271	chr1:27164025-27164082=27165354-27165481:+	none	0.312690041063617	none	0.331539538910092	none	0.29453927781681	FALSE
pspc1	DreINT0121357	chr1:27165482-27166799	1318	chr1:27165354-27165481=27166800-27167434:+	none	0.755515955704025	none	0.761403490592295	IR_IN_SNIP1_KD	0.757860688597616	FALSE
pwp2h	DreINT0122945	chr1:28146260-28146430	171	chr1:28146431-28146534=28146147-28146259:-	none	0.537671250385344	none	0.456892333679276	none	0.465363140677865	FALSE
pwp2h	DreINT0122955	chr1:28146031-28146146	116	chr1:28146147-28146259=28145936-28146030:-	none	0.621918024837727	none	0.603618263156323	none	0.582515112612174	FALSE
pwp2h	DreINT0122957	chr1:28140043-28145935	5893	chr1:28145936-28146030=28139943-28140042:-	none	0.492327529494341	none	0.52034295740074	none	0.509258080502665	TRUE
pwp2h	DreINT0122958	chr1:28139846-28139942	97	chr1:28139943-28140042=28139702-28139845:-	none	0.481901458239659	none	0.440790715443577	none	0.592030056338849	FALSE
pwp2h	DreINT0122959	chr1:28136201-28139701	3501	chr1:28139702-28139845=28136065-28136200:-	NOT_RETAINED	0.48149542065339	NOT_RETAINED	0.526116833786366	NOT_RETAINED	0.445613297032247	FALSE
pwp2h	DreINT0122960	chr1:28125965-28136064	10100	chr1:28136065-28136200=28125699-28125964:-	none	0.289561028479934	none	0.327844318668649	none	0.465820981925657	TRUE
pwp2h	DreINT0122961	chr1:28122912-28125698	2787	chr1:28125699-28125964=28122768-28122911:-	none	0.552065647767851	none	0.538442124467144	none	0.541213291789697	FALSE
pwp2h	DreINT0122962	chr1:28120592-28122767	2176	chr1:28122768-28122911=28120521-28120591:-	IR_IN_BUD13_KD_F2NEW	0.307947189042492	IR_IN_RBMX2_KD	0.348031877075129	IR_IN_SNIP1_KD	0.399476211731142	FALSE
pwp2h	DreINT0122963	chr1:28120441-28120520	80	chr1:28120521-28120591=28120304-28120440:-	none	0.562924015037443	none	0.5660353143551	IR_IN_SNIP1_KD	0.625133362737977	FALSE
pwp2h	DreINT0122946	chr1:28119954-28120303	350	chr1:28120304-28120440=28119805-28119953:-	none	0.529836259585258	IR_IN_RBMX2_KD	0.567349459546402	none	0.488883515364348	FALSE
pwp2h	DreINT0122947	chr1:28119522-28119804	283	chr1:28119805-28119953=28119374-28119521:-	none	0.296368070711679	none	0.375802124180803	none	0.356932991348071	FALSE
pwp2h	DreINT0122948	chr1:28110195-28119373	9179	chr1:28119374-28119521=28110044-28110194:-	none	0.26318304688643	none	0.365181969539218	none	0.417021662578006	FALSE
pwp2h	DreINT0122949	chr1:28109940-28110043	104	chr1:28110044-28110194=28109759-28109939:-	none	0.162545870575686	none	0.21007693523779	none	0.190716853478636	FALSE
pwp2h	DreINT0122950	chr1:28108610-28109758	1149	chr1:28109759-28109939=28108462-28108609:-	none	0.401314587416992	none	0.433937958878643	none	0.446244737784642	FALSE
pwp2h	DreINT0122951	chr1:28097160-28097297	138	chr1:28097298-28097406=28097094-28097159:-	none	0.136272955592202	none	0.160330752769222	none	0.202760893773974	FALSE
pwp2h	DreINT0122952	chr1:28096909-28097093	185	chr1:28097094-28097159=28096690-28096908:-	none	0.541931987250226	none	0.592012364529199	none	0.536272678388851	FALSE
pwp2h	DreINT0122953	chr1:28096589-28096689	101	chr1:28096690-28096908=28096438-28096588:-	none	0.519029944065115	none	0.465263047207058	none	0.541279373110139	FALSE
pwp2h	DreINT0122954	chr1:28096071-28096437	367	chr1:28096438-28096588=28095996-28096070:-	none	0.374483297185506	none	0.377770094206363	none	0.531308733488665	FALSE
pwp2h	DreINT0122956	chr1:28095841-28095995	155	chr1:28095996-28096070=28095113-28095840:-	none	0.792911618870152	none	0.769541021647166	none	0.80152621356966	FALSE
LONRF2	DreINT0013647	chr1:27751174-27779561	28388	chr1:27779562-27779773=27751051-27751173:-	none	0.107502434509031	none	0.154982648429282	none	0.237452262909033	FALSE
LONRF2	DreINT0013649	chr1:27734979-27751050	16072	chr1:27751051-27751173=27734829-27734978:-	none	0.171656369980293	none	0.235681246962044	none	0.308922537520104	FALSE
LONRF2	DreINT0013650	chr1:27734595-27734828	234	chr1:27734829-27734978=27734432-27734594:-	none	0.63738596488129	none	0.57390013297798	none	0.719045515674475	FALSE
LONRF2	DreINT0013651	chr1:27734263-27734431	169	chr1:27734432-27734594=27734175-27734262:-	none	0.407373576764987	none	0.393822958441354	none	0.426190925859311	FALSE
LONRF2	DreINT0013652	chr1:27734104-27734174	71	chr1:27734175-27734262=27733989-27734103:-	none	0.391382438722956	none	0.350643063524403	IR_IN_SNIP1_KD	0.372087176307955	FALSE
LONRF2	DreINT0013653	chr1:27728869-27733988	5120	chr1:27733989-27734103=27728747-27728868:-	none	0.329289816248359	none	0.382774054073309	none	0.458599881943429	TRUE
LONRF2	DreINT0013654	chr1:27711402-27728746	17345	chr1:27728747-27728868=27711243-27711401:-	none	0.225153037405333	none	0.292396968356658	none	0.372353196993016	FALSE
LONRF2	DreINT0013655	chr1:27700067-27711242	11176	chr1:27711243-27711401=27699904-27700066:-	none	0.388997441371847	none	0.479925662473314	none	0.462106342846224	FALSE
LONRF2	DreINT0013656	chr1:27698851-27699903	1053	chr1:27699904-27700066=27698701-27698850:-	none	0.625576846614337	none	0.670206118941787	none	0.572833209283754	TRUE
LONRF2	DreINT0013648	chr1:27698516-27698700	185	chr1:27698701-27698850=27697917-27698515:-	none	0.784899237907807	none	0.781612041856275	none	0.828316109160929	FALSE
ugt8	DreINT0171553	chr1:19888973-19900688	11716	chr1:19900689-19900841=19888146-19888972:-	none	0.488256640208471	none	0.529905496611992	none	0.591095544991051	TRUE
ugt8	DreINT0171554	chr1:19883561-19888145	4585	chr1:19888146-19888972=19883418-19883560:-	none	0.517552798804555	none	0.556206779803887	none	0.502023845264156	TRUE
ugt8	DreINT0171555	chr1:19876683-19883417	6735	chr1:19883418-19883560=19876606-19876682:-	none	0.20890922133565	none	0.285964560432068	none	0.35118892984253	TRUE
ugt8	DreINT0171556	chr1:19871956-19876605	4650	chr1:19876606-19876682=19871736-19871955:-	none	0.407307140043288	none	0.470837750670872	none	0.481438777323242	TRUE
ugt8	DreINT0171557	chr1:19867008-19871735	4728	chr1:19871736-19871955=19863130-19867007:-	none	0.998069718165612	none	0.998262538301658	none	0.995107709187563	FALSE
mycbpap	DreINT0099674	chr1:56566688-56566784	97	chr1:56566532-56566687=56566785-56566853:+	none	0.700834288758682	none	0.638593253942598	none	0.639111666083438	TRUE
mycbpap	DreINT0099677	chr1:56566854-56571280	4427	chr1:56566785-56566853=56571281-56571414:+	none	0.407467781465135	none	0.44912507410381	none	0.472053525618436	TRUE
mycbpap	DreINT0099678	chr1:56571415-56573177	1763	chr1:56571281-56571414=56573178-56573343:+	none	0.299557430532289	none	0.361191388139907	none	0.333857036857025	TRUE
mycbpap	DreINT0099679	chr1:56573344-56573459	116	chr1:56573178-56573343=56573460-56573566:+	none	0.677950062473653	none	0.712843305805788	none	0.730518564960834	TRUE
mycbpap	DreINT0099680	chr1:56573567-56573672	106	chr1:56573460-56573566=56573673-56573841:+	none	0.451911689258332	none	0.500477117404399	none	0.519465018120948	TRUE
mycbpap	DreINT0099681	chr1:56573842-56576229	2388	chr1:56573673-56573841=56576230-56576345:+	none	0.405525314564751	none	0.462319189742266	none	0.490438326450925	TRUE
mycbpap	DreINT0099682	chr1:56576346-56578437	2092	chr1:56576230-56576345=56578438-56578588:+	none	0.424272475274479	none	0.558242694298369	none	0.56357720896698	TRUE
mycbpap	DreINT0099683	chr1:56578589-56580782	2194	chr1:56578438-56578588=56580783-56580886:+	none	0.344807357634715	none	0.432395300792942	none	0.499939128449787	TRUE
mycbpap	DreINT0099664	chr1:56580887-56590713	9827	chr1:56580783-56580886=56590714-56590817:+	none	0.31079702306508	none	0.378698894653644	none	0.473670827870169	TRUE
mycbpap	DreINT0099665	chr1:56590818-56591242	425	chr1:56590714-56590817=56591243-56591351:+	none	0.397326142144169	none	0.453400538013084	none	0.480438431629487	TRUE
mycbpap	DreINT0099666	chr1:56591352-56591588	237	chr1:56591243-56591351=56591589-56591751:+	none	0.61456322648855	none	0.663125335768976	none	0.684518550971582	TRUE
mycbpap	DreINT0099667	chr1:56591752-56593252	1501	chr1:56591589-56591751=56593253-56593326:+	none	0.344556649372408	none	0.427688643450561	none	0.460689569764424	TRUE
mycbpap	DreINT0099668	chr1:56593327-56593407	81	chr1:56593253-56593326=56593408-56593521:+	none	0.640100057355709	none	0.668631451987878	none	0.70134680984027	TRUE
mycbpap	DreINT0099669	chr1:56593522-56594274	753	chr1:56593408-56593521=56594275-56594421:+	none	0.61952434657711	none	0.718836319779431	none	0.715349391435062	TRUE
mycbpap	DreINT0099670	chr1:56594422-56596528	2107	chr1:56594275-56594421=56596529-56596633:+	none	0.289839811066134	none	0.347563442656976	none	0.376960574433069	TRUE
mycbpap	DreINT0099671	chr1:56596634-56596741	108	chr1:56596529-56596633=56596742-56596869:+	none	0.62565491769803	none	0.671945476463015	none	0.651676273978028	TRUE
mycbpap	DreINT0099672	chr1:56596870-56597685	816	chr1:56596742-56596869=56597686-56597804:+	none	0.800353240757144	none	0.773647631049205	none	0.836862578803398	TRUE
mycbpap	DreINT0099673	chr1:56597805-56597972	168	chr1:56597686-56597804=56597973-56598058:+	none	0.646406784565862	none	0.677075807397694	none	0.616247486437201	TRUE
mycbpap	DreINT0099675	chr1:56598059-56601980	3922	chr1:56597973-56598058=56601981-56602085:+	none	0.750538891584691	none	0.81389634804088	none	0.845935398676767	TRUE
mycbpap	DreINT0099676	chr1:56602086-56602485	400	chr1:56601981-56602085=56602486-56602710:+	none	0.901656058610332	none	0.911356025760541	none	0.921518879246513	TRUE
mast1a	DreINT0093469	chr1:50668973-50689339	20367	chr1:50668953-50668972=50689340-50689428:+	none	0.116896293390741	none	0.146262654540842	none	0.240850739235738	TRUE
mast1a	DreINT0093480	chr1:50689429-50689551	123	chr1:50689340-50689428=50689552-50689627:+	none	0.606747730634736	none	0.654363653184201	none	0.674074479911537	TRUE
mast1a	DreINT0093487	chr1:50689628-50696396	6769	chr1:50689552-50689627=50696397-50696469:+	none	0.198578915164936	none	0.275611764181278	none	0.340674707033383	TRUE
mast1a	DreINT0093488	chr1:50696470-50701380	4911	chr1:50696397-50696469=50701381-50701538:+	none	0.327044510549852	none	0.415059738462037	none	0.474496453414501	TRUE
mast1a	DreINT0093489	chr1:50701539-50704033	2495	chr1:50701381-50701538=50704034-50704109:+	none	0.305723803077362	none	0.405067507264543	none	0.462277609760631	TRUE
mast1a	DreINT0093490	chr1:50704110-50705317	1208	chr1:50704034-50704109=50705318-50705527:+	none	0.367474367038672	none	0.45209726949469	none	0.413450327499128	TRUE
mast1a	DreINT0093491	chr1:50705528-50707213	1686	chr1:50705318-50705527=50707214-50707315:+	none	0.421867083620457	none	0.49568583128085	none	0.534780724251786	TRUE
mast1a	DreINT0093492	chr1:50707316-50711221	3906	chr1:50707214-50707315=50711222-50711354:+	none	0.350662634429702	none	0.441948219426702	none	0.452724338593416	TRUE
mast1a	DreINT0093493	chr1:50711355-50714972	3618	chr1:50711222-50711354=50714973-50715040:+	none	0.251477300893015	none	0.338085848279959	none	0.370770743529532	TRUE
mast1a	DreINT0093470	chr1:50715041-50716826	1786	chr1:50714973-50715040=50716827-50716903:+	none	0.519550786800605	none	0.557089696084771	none	0.571559381504911	TRUE
mast1a	DreINT0093471	chr1:50716904-50717006	103	chr1:50716827-50716903=50717007-50717215:+	none	0.618287004642144	none	0.659324681249245	none	0.649709729585646	TRUE
mast1a	DreINT0093472	chr1:50717216-50717299	84	chr1:50717007-50717215=50717300-50717438:+	none	0.639961109784946	none	0.632027104672602	none	0.637939327509166	TRUE
mast1a	DreINT0093473	chr1:50717439-50718851	1413	chr1:50717300-50717438=50718852-50718984:+	none	0.402105618505409	none	0.457324852036138	none	0.510085514468452	TRUE
mast1a	DreINT0093474	chr1:50718985-50721777	2793	chr1:50718852-50718984=50721778-50721943:+	none	0.424872182628842	none	0.487384800650437	none	0.49478117190146	TRUE
mast1a	DreINT0093475	chr1:50721944-50722103	160	chr1:50721778-50721943=50722104-50722205:+	none	0.697896911751962	none	0.716066963735002	none	0.689151459076305	TRUE
mast1a	DreINT0093476	chr1:50722206-50724867	2662	chr1:50722104-50722205=50724868-50724990:+	none	0.465195622602681	none	0.542905931419011	none	0.519284788868707	TRUE
mast1a	DreINT0093477	chr1:50724991-50725077	87	chr1:50724868-50724990=50725078-50725187:+	none	0.625715007855674	none	0.631981573485474	none	0.725887833968437	TRUE
mast1a	DreINT0093478	chr1:50725188-50725720	533	chr1:50725078-50725187=50725721-50725881:+	none	0.544652192781704	none	0.613476293217974	none	0.590961084637226	TRUE
mast1a	DreINT0093479	chr1:50725882-50727269	1388	chr1:50725721-50725881=50727270-50727520:+	none	0.674951065819969	none	0.736780742473533	none	0.69718932802564	TRUE
mast1a	DreINT0093481	chr1:50727521-50728358	838	chr1:50727270-50727520=50728359-50728607:+	none	0.631572714224079	none	0.726905465622608	none	0.627915376031495	TRUE
mast1a	DreINT0093482	chr1:50728608-50728794	187	chr1:50728359-50728607=50728795-50729024:+	none	0.462257977163727	none	0.527788850908028	none	0.495325544949282	TRUE
mast1a	DreINT0093483	chr1:50729025-50729107	83	chr1:50728795-50729024=50729108-50729230:+	none	0.532911710083875	none	0.501684251523245	none	0.549560448783081	TRUE
mast1a	DreINT0093484	chr1:50729231-50729374	144	chr1:50729108-50729230=50729375-50729508:+	none	0.504232281540888	none	0.493175407665448	none	0.549668164764403	TRUE
mast1a	DreINT0093485	chr1:50729509-50729613	105	chr1:50729375-50729508=50729614-50729801:+	none	0.42754869500564	none	0.419414769089731	none	0.517888628388802	TRUE
mast1a	DreINT0093486	chr1:50729802-50729899	98	chr1:50729614-50729801=50729900-50731653:+	none	0.983570465427058	none	0.974429291861227	none	0.969354973693804	TRUE
si:ch211-214c7.4	DreINT0138055	chr1:45015714-45035925	20212	chr1:45015424-45015713=45035926-45036660:+	none	0.424158942180009	none	0.458504529669657	none	0.481541646772443	FALSE
si:ch211-214c7.4	DreINT0138056	chr1:45036661-45039090	2430	chr1:45035926-45036660=45039091-45039172:+	none	0.558182007024657	none	0.627887121665104	none	0.50539394152606	TRUE
si:ch211-214c7.4	DreINT0138057	chr1:45039173-45043874	4702	chr1:45039091-45039172=45043875-45044026:+	none	0.254029182946235	none	0.296163296309154	none	0.373238052559297	FALSE
si:ch211-214c7.4	DreINT0138058	chr1:45044027-45044136	110	chr1:45043875-45044026=45044137-45046767:+	none	0.980864367580458	none	0.965751748607575	none	0.955641348332706	FALSE
si:ch211-214c7.4	DreINT0138059	chr1:45046768-45049276	2509	chr1:45044137-45046767=45049277-45053059:+	none	0.999504563594911	none	0.999582633677534	none	0.997575431867815	TRUE
si:ch211-202n12.3	DreINT0137691	chr1:25885493-25885674	182	chr1:25885141-25885492=25885675-25885919:+	none	0.847272477406374	none	0.827093055693897	none	0.829432417897404	TRUE
si:ch211-202n12.3	DreINT0137692	chr1:25888805-25888887	83	chr1:25888423-25888804=25888888-25889064:+	none	0.731272076130602	none	0.648458068711762	none	0.703435894759749	TRUE
si:ch211-202n12.3	DreINT0137693	chr1:25889398-25889566	169	chr1:25889268-25889397=25889567-25889730:+	none	0.456669655394622	none	0.442485200960468	none	0.580217717730489	TRUE
si:ch211-202n12.3	DreINT0137690	chr1:25889731-25890054	324	chr1:25889567-25889730=25890055-25890879:+	none	0.936714148226297	none	0.935346780200607	none	0.950391943075075	TRUE
si:ch211-222o17.1	DreINT0138311	chr1:1202295-1204199	1905	chr1:1204200-1204356=1202208-1202294:-	none	0.871524822465765	none	0.847261284412993	none	0.828890844880333	TRUE
saraf	DreINT0130759	chr1:11362690-11364812	2123	chr1:11362429-11362689=11364813-11364991:+	none	0.56536763925875	none	0.599182268506387	none	0.461316906640259	FALSE
saraf	DreINT0130760	chr1:11364992-11367772	2781	chr1:11364813-11364991=11367773-11368265:+	none	0.347374364397514	none	0.406801674344059	none	0.487019401735737	TRUE
saraf	DreINT0130761	chr1:11368266-11369310	1045	chr1:11367773-11368265=11369311-11369485:+	none	0.50428962377019	none	0.593191878196667	none	0.492046314283011	TRUE
saraf	DreINT0130762	chr1:11369486-11370843	1358	chr1:11369311-11369485=11370844-11370935:+	none	0.335621537764639	none	0.431984542964362	none	0.38093293033099	FALSE
saraf	DreINT0130763	chr1:11370936-11371090	155	chr1:11370844-11370935=11371091-11371639:+	none	0.854206630191581	none	0.867188008009907	none	0.886169013760693	FALSE
caly	DreINT0040631	chr1:48622578-48626838	4261	chr1:48622466-48622577=48626839-48626969:+	none	0.46005082048088	none	0.443216778131297	none	0.433931183802757	TRUE
caly	DreINT0040632	chr1:48626970-48643758	16789	chr1:48626839-48626969=48643759-48643875:+	none	0.0878922097697979	none	0.133480260952629	none	0.227896629796598	FALSE
caly	DreINT0040633	chr1:48643876-48645213	1338	chr1:48643759-48643875=48645214-48645327:+	none	0.534747034294166	none	0.537116110362212	none	0.49734864526539	FALSE
caly	DreINT0040634	chr1:48645328-48649241	3914	chr1:48645214-48645327=48649242-48650639:+	none	0.854374245702987	none	0.877240839959365	none	0.902836501801114	FALSE
p2rx3b	DreINT0109353	chr1:44045165-44045752	588	chr1:44044851-44045164=44045753-44045888:+	none	0.589137275991334	none	0.597932841310573	none	0.501006525740033	TRUE
p2rx3b	DreINT0109356	chr1:44045889-44046957	1069	chr1:44045753-44045888=44046958-44047029:+	none	0.313226782893477	none	0.401291528882103	none	0.389495116954957	TRUE
p2rx3b	DreINT0109357	chr1:44047030-44047957	928	chr1:44046958-44047029=44047958-44048027:+	none	0.38440601602497	none	0.409946186443168	none	0.529640884709736	TRUE
p2rx3b	DreINT0109358	chr1:44048028-44048119	92	chr1:44047958-44048027=44048120-44048213:+	none	0.564084010369108	none	0.561904068823823	none	0.459909545466026	TRUE
p2rx3b	DreINT0109359	chr1:44048214-44048292	79	chr1:44048120-44048213=44048293-44048370:+	none	0.66169637337036	none	0.651461999365922	none	0.675423777133024	TRUE
p2rx3b	DreINT0109360	chr1:44048371-44048474	104	chr1:44048293-44048370=44048475-44048616:+	none	0.399523142719891	none	0.384691825303753	none	0.498111649565068	TRUE
p2rx3b	DreINT0109361	chr1:44048617-44051442	2826	chr1:44048475-44048616=44051443-44051579:+	none	0.457412652184984	none	0.502040757113986	none	0.420157302745017	TRUE
p2rx3b	DreINT0109362	chr1:44051580-44052922	1343	chr1:44051443-44051579=44052923-44053016:+	none	0.32313004524246	none	0.343268472235171	none	0.397765991660075	TRUE
p2rx3b	DreINT0109363	chr1:44053017-44053099	83	chr1:44052923-44053016=44053100-44053165:+	none	0.63499226399599	none	0.614618622080036	none	0.612266489554991	TRUE
p2rx3b	DreINT0109354	chr1:44053166-44055261	2096	chr1:44053100-44053165=44055262-44055339:+	none	0.481999355610469	none	0.486611212450622	none	0.545615987888882	TRUE
p2rx3b	DreINT0109355	chr1:44055340-44055436	97	chr1:44055262-44055339=44055437-44057085:+	none	0.967364716084628	none	0.93708010689332	none	0.961390553055111	TRUE
tmem154	DreINT0164424	chr1:24484349-24486066	1718	chr1:24486067-24486257=24484310-24484348:-	none	0.464450658700797	none	0.486153062727735	none	0.494134001143406	TRUE
tmem154	DreINT0164425	chr1:24484130-24484309	180	chr1:24484310-24484348=24484091-24484129:-	none	0.417499536301055	none	0.444478520789887	none	0.460173088507044	TRUE
tmem154	DreINT0164426	chr1:24483346-24484090	745	chr1:24484091-24484129=24483301-24483345:-	none	0.276976541578128	none	0.29183473080832	none	0.255576818901967	TRUE
tmem154	DreINT0164427	chr1:24483201-24483300	100	chr1:24483301-24483345=24482991-24483200:-	none	0.598786786111626	none	0.591359727651605	none	0.57390056928002	FALSE
tmem154	DreINT0164428	chr1:24479196-24482990	3795	chr1:24482991-24483200=24479144-24479195:-	IR_IN_BUD13_KD_F2NEW	0.594377802180375	IR_IN_RBMX2_KD	0.575886680650097	none	0.588600952862261	FALSE
tmem154	DreINT0164429	chr1:24476941-24479143	2203	chr1:24479144-24479195=24476867-24476940:-	none	0.433294025678182	none	0.483733748935169	none	0.498011284345331	FALSE
tmem154	DreINT0164430	chr1:24474483-24476866	2384	chr1:24476867-24476940=24474434-24474482:-	none	0.342328367815846	none	0.382399739322525	none	0.448336003713066	FALSE
tmem154	DreINT0164431	chr1:24463832-24474433	10602	chr1:24474434-24474482=24463247-24463831:-	none	0.734437058813506	none	0.78192039213972	none	0.830831337902029	FALSE
scoca	DreINT0131591	chr1:39844932-39849631	4700	chr1:39844467-39844931=39849632-39849703:+	none	0.452908602398914	none	0.490845162796479	none	0.421419230782032	FALSE
scoca	DreINT0131592	chr1:39849704-39849893	190	chr1:39849632-39849703=39849894-39849974:+	none	0.0416416017672577	none	0.0681884950117076	none	0.0869061245451986	FALSE
scoca	DreINT0131593	chr1:39849975-39850136	162	chr1:39849894-39849974=39850137-39851540:+	none	0.842704295113986	none	0.803371669239812	none	0.883225118442739	FALSE
ZNF70 (1 of 16)	DreINT0023210	chr1:40895288-40895446	159	chr1:40894935-40895287=40895447-40895556:+	none	0.681119525285771	none	0.61773946260512	none	0.584255695040722	FALSE
ZNF70 (1 of 16)	DreINT0023211	chr1:40895557-40898026	2470	chr1:40895447-40895556=40898027-40898144:+	none	0.267550300714067	none	0.329624229651087	none	0.417029018436836	FALSE
ZNF70 (1 of 16)	DreINT0023212	chr1:40898145-40899088	944	chr1:40898027-40898144=40899089-40899186:+	none	0.397124820877478	none	0.471435161040337	none	0.449480480541009	TRUE
ZNF70 (1 of 16)	DreINT0023213	chr1:40899187-40899272	86	chr1:40899089-40899186=40899273-40899375:+	none	0.567945955179757	none	0.537058579102914	none	0.646784061887939	TRUE
ZNF70 (1 of 16)	DreINT0023214	chr1:40900541-40901503	963	chr1:40900449-40900540=40901504-40901585:+	none	0.232950952434057	none	0.283488175922699	none	0.363449360669705	TRUE
ZNF70 (1 of 16)	DreINT0023215	chr1:40901586-40903719	2134	chr1:40901504-40901585=40903720-40904945:+	none	0.950894115324292	none	0.952747512506302	none	0.928164731384579	TRUE
si:dkey-253i9.4	DreINT0145035	chr1:20470596-20472609	2014	chr1:20472610-20472834=20470473-20470595:-	none	0.461116035459594	none	0.493567439550569	none	0.448585653205496	TRUE
si:dkey-253i9.4	DreINT0145046	chr1:20468583-20470472	1890	chr1:20470473-20470595=20468405-20468582:-	none	0.504657883520748	none	0.596750253790612	none	0.555433757957358	FALSE
si:dkey-253i9.4	DreINT0145050	chr1:20468287-20468404	118	chr1:20468405-20468582=20468150-20468286:-	none	0.43487601028257	none	0.434232639284529	none	0.512556558572182	FALSE
si:dkey-253i9.4	DreINT0145051	chr1:20468041-20468149	109	chr1:20468150-20468286=20467882-20468040:-	none	0.518426711089389	none	0.547555945948913	none	0.535997894468461	FALSE
si:dkey-253i9.4	DreINT0145052	chr1:20467674-20467881	208	chr1:20467882-20468040=20467521-20467673:-	none	0.290979397266013	none	0.316543415978016	none	0.333042533494355	FALSE
si:dkey-253i9.4	DreINT0145053	chr1:20467001-20467520	520	chr1:20467521-20467673=20466836-20467000:-	none	0.389839468085061	none	0.459585120852237	none	0.400375138669679	FALSE
si:dkey-253i9.4	DreINT0145054	chr1:20466746-20466835	90	chr1:20466836-20467000=20466638-20466745:-	none	0.606815523521245	none	0.591424000030119	none	0.654040965105458	FALSE
si:dkey-253i9.4	DreINT0145055	chr1:20466510-20466637	128	chr1:20466638-20466745=20466306-20466509:-	NOT_RETAINED	0.451784856917683	NOT_RETAINED	0.52099762329498	NOT_RETAINED	0.514137682457077	FALSE
si:dkey-253i9.4	DreINT0145056	chr1:20466201-20466305	105	chr1:20466306-20466509=20466092-20466200:-	none	0.634359861158626	none	0.616736843775669	none	0.700485695082774	FALSE
si:dkey-253i9.4	DreINT0145036	chr1:20466013-20466091	79	chr1:20466092-20466200=20465769-20466012:-	none	0.67403480808812	none	0.65036856208712	none	0.682634598527606	FALSE
si:dkey-253i9.4	DreINT0145037	chr1:20464798-20465768	971	chr1:20465769-20466012=20464637-20464797:-	none	0.391393298829892	none	0.459614470036115	none	0.396490430414109	FALSE
si:dkey-253i9.4	DreINT0145038	chr1:20461329-20464636	3308	chr1:20464637-20464797=20461088-20461328:-	none	0.354479876594741	none	0.40241111388832	none	0.447637066418527	TRUE
si:dkey-253i9.4	DreINT0145039	chr1:20461006-20461087	82	chr1:20461088-20461328=20460622-20461005:-	none	0.694667879490582	none	0.611682498411415	none	0.683418023106232	FALSE
si:dkey-253i9.4	DreINT0145040	chr1:20459052-20460621	1570	chr1:20460622-20461005=20458840-20459051:-	none	0.418588092460378	none	0.440403659413596	none	0.432771720095975	FALSE
si:dkey-253i9.4	DreINT0145041	chr1:20458744-20458839	96	chr1:20458840-20459051=20458620-20458743:-	none	0.507753197322737	none	0.458801484992472	none	0.513957862738602	FALSE
si:dkey-253i9.4	DreINT0145042	chr1:20457277-20458619	1343	chr1:20458620-20458743=20457253-20457276:-	none	0.449990137066681	none	0.442831037722418	none	0.581828181078915	FALSE
si:dkey-253i9.4	DreINT0145043	chr1:20455833-20457252	1420	chr1:20457253-20457276=20455636-20455832:-	none	0.198126209272427	none	0.258611229481907	none	0.299268652532559	FALSE
si:dkey-253i9.4	DreINT0145044	chr1:20453869-20455635	1767	chr1:20455636-20455832=20453743-20453868:-	none	0.327258123655888	none	0.385880273718487	none	0.485761639733349	TRUE
si:dkey-253i9.4	DreINT0145045	chr1:20453261-20453742	482	chr1:20453743-20453868=20453159-20453260:-	none	0.477970651646757	none	0.553232610763306	none	0.420909014302541	FALSE
si:dkey-253i9.4	DreINT0145047	chr1:20451832-20453158	1327	chr1:20453159-20453260=20451672-20451831:-	none	0.358563303303212	none	0.455300996668945	none	0.424420586272361	FALSE
si:dkey-253i9.4	DreINT0145048	chr1:20449228-20451671	2444	chr1:20451672-20451831=20448698-20449227:-	none	0.511879936825626	none	0.589850734000354	none	0.544463183596271	TRUE
si:dkey-253i9.4	DreINT0145049	chr1:20446546-20448697	2152	chr1:20448698-20449227=20445883-20446545:-	none	0.720342883550525	none	0.736933898897645	none	0.807449229092923	FALSE
si:ch211-132g1.3	DreINT0135936	chr1:1736711-1737652	942	chr1:1737653-1737800=1736417-1736710:-	none	0.598964727542853	none	0.572809274313803	none	0.538710468253306	FALSE
si:ch211-132g1.3	DreINT0135937	chr1:1735127-1736416	1290	chr1:1736417-1736710=1734854-1735126:-	none	0.633467061255925	none	0.635549075705605	none	0.545443134554179	TRUE
si:ch211-132g1.3	DreINT0135938	chr1:1730758-1734853	4096	chr1:1734854-1735126=1730656-1730757:-	none	0.752511698715647	none	0.758498323593369	none	0.811532383383389	TRUE
si:ch211-132g1.3	DreINT0135939	chr1:1729421-1730655	1235	chr1:1730656-1730757=1729388-1729420:-	none	0.460034534132374	none	0.431290630405612	none	0.54447701128763	TRUE
si:ch211-132g1.3	DreINT0135940	chr1:1727320-1729387	2068	chr1:1729388-1729420=1727278-1727319:-	none	0.558748236911903	none	0.536785318266007	none	0.537341046880252	TRUE
si:ch211-132g1.3	DreINT0135941	chr1:1726983-1727277	295	chr1:1727278-1727319=1726633-1726982:-	none	0.837025257189271	none	0.847575071431311	none	0.844314733913394	TRUE
b4galt1	DreINT0036478	chr1:11469023-11473868	4846	chr1:11473869-11474348=11468787-11469022:-	none	0.69180546968015	none	0.655451245221659	none	0.583780786613206	TRUE
b4galt1	DreINT0036479	chr1:11464829-11468786	3958	chr1:11468787-11469022=11464641-11464828:-	none	0.29766937053741	none	0.34093934113613	none	0.337994010757875	FALSE
b4galt1	DreINT0036480	chr1:11458966-11464640	5675	chr1:11464641-11464828=11458843-11458965:-	none	0.618324623053582	none	0.661243293541403	none	0.791316810083242	FALSE
slc2a15b	DreINT0150451	chr1:30840829-30844157	3329	chr1:30840657-30840828=30844158-30844256:+	none	0.623174977440214	none	0.589539257451834	none	0.547206748359912	FALSE
slc2a15b	DreINT0150454	chr1:30844257-30846101	1845	chr1:30844158-30844256=30846102-30846262:+	none	0.440196581626438	none	0.449146734651642	none	0.466880488261948	FALSE
slc2a15b	DreINT0150455	chr1:30846263-30846731	469	chr1:30846102-30846262=30846732-30846856:+	none	0.493023585868083	none	0.505571326081237	none	0.53358221634337	FALSE
slc2a15b	DreINT0150456	chr1:30846857-30850809	3953	chr1:30846732-30846856=30850810-30850955:+	none	0.325711738448633	none	0.395307768250577	none	0.413424144274395	FALSE
slc2a15b	DreINT0150457	chr1:30850956-30852976	2021	chr1:30850810-30850955=30852977-30853109:+	none	0.530645658879869	none	0.548934749929479	none	0.586351427011595	TRUE
slc2a15b	DreINT0150458	chr1:30853110-30860647	7538	chr1:30852977-30853109=30860648-30860835:+	none	0.294962933424238	none	0.338586075455705	none	0.347683490394783	FALSE
slc2a15b	DreINT0150459	chr1:30860836-30860929	94	chr1:30860648-30860835=30860930-30861040:+	none	0.596188131199641	none	0.565572132082254	none	0.638124013382899	FALSE
slc2a15b	DreINT0150460	chr1:30861041-30862076	1036	chr1:30860930-30861040=30862077-30862178:+	none	0.194529284851556	none	0.243875320946237	none	0.286959531219796	TRUE
slc2a15b	DreINT0150461	chr1:30862179-30863255	1077	chr1:30862077-30862178=30863256-30863331:+	none	0.206625610676425	none	0.278042444495057	none	0.22824576220292	FALSE
slc2a15b	DreINT0150452	chr1:30863332-30863700	369	chr1:30863256-30863331=30863701-30863828:+	none	0.311156702464446	none	0.371189059318457	none	0.374560635363675	FALSE
slc2a15b	DreINT0150453	chr1:30863829-30865381	1553	chr1:30863701-30863828=30865382-30865849:+	none	0.789770703277452	none	0.777419247784859	none	0.838823070969727	FALSE
si:ch211-217k17.12	DreINT0138156	chr1:51799974-51802219	2246	chr1:51802220-51802318=51799109-51799973:-	none	0.930761108921241	none	0.918875214782525	none	0.887185029565193	TRUE
cnppd1	DreINT0048459	chr1:5464375-5465108	734	chr1:5464152-5464374=5465109-5465211:+	none	0.548859685922935	none	0.554566854399675	none	0.472941900734208	FALSE
cnppd1	DreINT0048460	chr1:5465212-5467361	2150	chr1:5465109-5465211=5467362-5467443:+	none	0.296274366612816	none	0.329411507305437	none	0.327600878658553	FALSE
cnppd1	DreINT0048461	chr1:5467444-5467533	90	chr1:5467362-5467443=5467534-5467654:+	none	0.469521387699944	none	0.473331964936108	none	0.524250827680615	FALSE
cnppd1	DreINT0048462	chr1:5467655-5468646	992	chr1:5467534-5467654=5468647-5468775:+	none	0.458595322944197	none	0.468636042753281	none	0.433431622176454	FALSE
cnppd1	DreINT0048463	chr1:5468776-5468874	99	chr1:5468647-5468775=5468875-5468936:+	none	0.607646340978294	none	0.595228153555435	none	0.623164106648745	FALSE
cnppd1	DreINT0048464	chr1:5468937-5469597	661	chr1:5468875-5468936=5469598-5469715:+	none	0.392627846300745	none	0.449406278007059	none	0.411008325871045	TRUE
cnppd1	DreINT0048465	chr1:5469716-5470471	756	chr1:5469598-5469715=5470472-5472039:+	none	0.919501335233663	none	0.922591621019705	none	0.911819454985456	FALSE
eef1a1b	DreINT0061261	chr1:30306922-30308476	1555	chr1:30306886-30306921=30308477-30308607:+	none	0.46038598881725	none	0.486602529322	none	0.394740429729208	TRUE
eef1a1b	DreINT0061262	chr1:30308608-30310007	1400	chr1:30308477-30308607=30310008-30310180:+	none	0.38254403569215	none	0.439135030323626	none	0.414617741941164	TRUE
eef1a1b	DreINT0061263	chr1:30310181-30313339	3159	chr1:30310008-30310180=30313340-30313519:+	none	0.293588734492268	none	0.363617747680267	none	0.408223910236542	TRUE
eef1a1b	DreINT0061264	chr1:30313520-30313602	83	chr1:30313340-30313519=30313603-30313899:+	none	0.591562670332585	none	0.561547713946244	none	0.611119857004074	TRUE
eef1a1b	DreINT0061265	chr1:30313900-30314716	817	chr1:30313603-30313899=30314717-30314867:+	none	0.180432890448771	none	0.235271342263105	none	0.280370731205315	TRUE
eef1a1b	DreINT0061266	chr1:30314868-30315219	352	chr1:30314717-30314867=30315220-30315476:+	none	0.376384089375158	none	0.403098637501032	none	0.459689213752938	TRUE
eef1a1b	DreINT0061267	chr1:30315477-30318533	3057	chr1:30315220-30315476=30318534-30318768:+	none	0.381905408717025	none	0.455404581103398	none	0.455493797697295	TRUE
eef1a1b	DreINT0061268	chr1:30318769-30325527	6759	chr1:30318534-30318768=30325528-30326291:+	none	0.742735357814457	none	0.77245704020963	none	0.828963357248079	TRUE
dachb	DreINT0054648	chr1:9695172-9727480	32309	chr1:9694595-9695171=9727481-9727593:+	none	0.0407271017122957	none	0.0725653341484612	none	0.136078690302401	TRUE
dachb	DreINT0054651	chr1:9727594-9738517	10924	chr1:9727481-9727593=9738518-9738643:+	none	0.693152819197393	none	0.787347575479208	none	0.833025015995363	TRUE
dachb	DreINT0054652	chr1:9738644-9748337	9694	chr1:9738518-9738643=9748338-9748457:+	none	0.670908185210627	none	0.739421728825776	none	0.834943373597984	TRUE
dachb	DreINT0054653	chr1:9748458-9748670	213	chr1:9748338-9748457=9748671-9748840:+	none	0.901130754068226	none	0.899693792979471	none	0.918413740352345	TRUE
dachb	DreINT0054654	chr1:9748841-9752513	3673	chr1:9748671-9748840=9752514-9752655:+	none	0.847271101125943	none	0.860437608696154	none	0.894294633632521	TRUE
dachb	DreINT0054655	chr1:9752656-9753811	1156	chr1:9752514-9752655=9753812-9753883:+	none	0.749898506148012	none	0.769106361155068	none	0.827265790174806	TRUE
dachb	DreINT0054656	chr1:9753884-9755817	1934	chr1:9753812-9753883=9755818-9755948:+	none	0.818703708209838	none	0.827656899376447	none	0.896185776319542	TRUE
dachb	DreINT0054657	chr1:9755949-9756032	84	chr1:9755818-9755948=9756033-9756180:+	none	0.972887542847431	none	0.967142698907507	none	0.961259036750443	TRUE
dachb	DreINT0054658	chr1:9756181-9757945	1765	chr1:9756033-9756180=9757946-9758083:+	none	0.768411453007797	none	0.792570291992466	none	0.843567170022398	TRUE
dachb	DreINT0054649	chr1:9758084-9758177	94	chr1:9757946-9758083=9758178-9758243:+	none	0.961745523060487	none	0.952969132359133	none	0.954508545589774	TRUE
dachb	DreINT0054650	chr1:9758244-9763831	5588	chr1:9758178-9758243=9763832-9764413:+	none	0.687867568301796	none	0.743744122606393	none	0.779097882227914	TRUE
SH2D3A	DreINT0018927	chr1:58263209-58264476	1268	chr1:58264477-58264595=58263103-58263208:-	none	0.658825912647354	none	0.665229517473749	none	0.660131937744812	TRUE
SH2D3A	DreINT0018929	chr1:58260655-58263102	2448	chr1:58263103-58263208=58260480-58260654:-	none	0.52000108093448	none	0.596935659865291	none	0.588266202134089	TRUE
SH2D3A	DreINT0018930	chr1:58256425-58260479	4055	chr1:58260480-58260654=58256394-58256424:-	none	0.351772304616555	none	0.478732107402224	none	0.531261049015071	TRUE
SH2D3A	DreINT0018931	chr1:58256193-58256393	201	chr1:58256394-58256424=58256076-58256192:-	none	0.598431571457664	none	0.647032394619832	none	0.717065812348658	FALSE
SH2D3A	DreINT0018932	chr1:58254814-58256075	1262	chr1:58256076-58256192=58254670-58254813:-	none	0.643617060219239	none	0.74006349278067	none	0.683366985425798	TRUE
SH2D3A	DreINT0018933	chr1:58254594-58254669	76	chr1:58254670-58254813=58254319-58254593:-	none	0.917640656788562	none	0.922132547666336	none	0.882136922643767	TRUE
SH2D3A	DreINT0018934	chr1:58252258-58254318	2061	chr1:58254319-58254593=58252175-58252257:-	none	0.437926340012348	none	0.507090475090714	none	0.603266815890868	FALSE
SH2D3A	DreINT0018935	chr1:58252090-58252174	85	chr1:58252175-58252257=58251818-58252089:-	none	0.626258615574631	none	0.665474604984512	none	0.647086486988494	TRUE
SH2D3A	DreINT0018936	chr1:58251604-58251817	214	chr1:58251818-58252089=58251238-58251603:-	none	0.666193825009111	none	0.713602825085448	none	0.669984279046224	TRUE
SH2D3A	DreINT0018928	chr1:58251066-58251237	172	chr1:58251238-58251603=58250748-58251065:-	none	0.846756646627081	none	0.874767721609812	none	0.898066220204048	FALSE
naa15b	DreINT0101579	chr1:39895444-39900728	5285	chr1:39895224-39895443=39900729-39900813:+	none	0.477912711905983	none	0.531847541411989	none	0.727487495026397	FALSE
naa15b	DreINT0101589	chr1:39900814-39901714	901	chr1:39900729-39900813=39901715-39901819:+	none	0.651789942175203	none	0.647234590326934	none	0.539854009336738	FALSE
naa15b	DreINT0101590	chr1:39901820-39903012	1193	chr1:39901715-39901819=39903013-39903170:+	none	0.460056872482904	none	0.472454289324659	none	0.560686683114611	FALSE
naa15b	DreINT0101591	chr1:39903171-39904494	1324	chr1:39903013-39903170=39904495-39904629:+	none	0.393066287698303	none	0.51215793782495	none	0.441063933590723	FALSE
naa15b	DreINT0101592	chr1:39904630-39908799	4170	chr1:39904495-39904629=39908800-39908953:+	none	0.511913066298721	none	0.582923171830185	none	0.644177214706277	FALSE
naa15b	DreINT0101593	chr1:39908954-39909102	149	chr1:39908800-39908953=39909103-39909222:+	none	0.535754011395958	none	0.558886716108368	none	0.517903928080502	FALSE
naa15b	DreINT0101594	chr1:39909223-39910877	1655	chr1:39909103-39909222=39910878-39910973:+	none	0.406555073030995	none	0.406969477757116	none	0.495035246605719	FALSE
naa15b	DreINT0101595	chr1:39910974-39911058	85	chr1:39910878-39910973=39911059-39911165:+	none	0.603649495325372	none	0.590473552247957	none	0.60393899996834	FALSE
naa15b	DreINT0101596	chr1:39911166-39911245	80	chr1:39911059-39911165=39911246-39911318:+	none	0.548938411216847	none	0.518735724043072	none	0.542205879626926	TRUE
naa15b	DreINT0101580	chr1:39911319-39913641	2323	chr1:39911246-39911318=39913642-39913811:+	none	0.327882242227689	none	0.373124058394291	none	0.361028062490928	FALSE
naa15b	DreINT0101581	chr1:39913812-39914020	209	chr1:39913642-39913811=39914021-39914173:+	none	0.357359556118752	none	0.370274589193701	none	0.355183769476229	FALSE
naa15b	DreINT0101582	chr1:39914174-39914586	413	chr1:39914021-39914173=39914587-39914715:+	none	0.549639249341557	none	0.577828490631643	none	0.541917372323833	FALSE
naa15b	DreINT0101583	chr1:39914716-39917910	3195	chr1:39914587-39914715=39917911-39918124:+	none	0.268643008266679	none	0.35611367104221	none	0.359209276143634	TRUE
naa15b	DreINT0101584	chr1:39918125-39918208	84	chr1:39917911-39918124=39918209-39918402:+	none	0.663334626742086	none	0.603154610986839	none	0.645555986634198	FALSE
naa15b	DreINT0101585	chr1:39918403-39918584	182	chr1:39918209-39918402=39918585-39918693:+	none	0.766339248197083	none	0.744666247358339	none	0.821508083655662	FALSE
naa15b	DreINT0101586	chr1:39918694-39920147	1454	chr1:39918585-39918693=39920148-39920246:+	none	0.327238203899913	none	0.348210511574878	none	0.376201371628985	FALSE
naa15b	DreINT0101587	chr1:39920247-39920406	160	chr1:39920148-39920246=39920407-39920550:+	none	0.373322755917529	none	0.441621532471325	none	0.448096729200942	FALSE
naa15b	DreINT0101588	chr1:39920551-39920638	88	chr1:39920407-39920550=39920639-39920736:+	none	0.799234286328435	none	0.754200636065209	none	0.87548131334195	FALSE
tmem8a	DreINT0165204	chr1:9252897-9256192	3296	chr1:9256193-9256383=9252686-9252896:-	none	0.469351260848652	none	0.455247751961404	none	0.602698634422507	TRUE
tmem8a	DreINT0165207	chr1:9250512-9252685	2174	chr1:9252686-9252896=9250387-9250511:-	none	0.426426499770254	none	0.513089248260743	none	0.479608923626886	TRUE
tmem8a	DreINT0165208	chr1:9249649-9250386	738	chr1:9250387-9250511=9249386-9249648:-	NOT_RETAINED	0.390607108710537	NOT_RETAINED	0.419013779169406	NOT_RETAINED	0.481813122888165	FALSE
tmem8a	DreINT0165209	chr1:9247986-9249385	1400	chr1:9249386-9249648=9247702-9247985:-	none	0.483564046484415	none	0.546638064851391	none	0.531945296047137	TRUE
tmem8a	DreINT0165210	chr1:9246523-9247701	1179	chr1:9247702-9247985=9246429-9246522:-	none	0.154155724738805	none	0.205996274734412	none	0.204235616256077	TRUE
tmem8a	DreINT0165211	chr1:9246336-9246428	93	chr1:9246429-9246522=9246218-9246335:-	none	0.478745301180175	none	0.482555423348101	none	0.497741937240602	FALSE
tmem8a	DreINT0165212	chr1:9244511-9246217	1707	chr1:9246218-9246335=9244371-9244510:-	none	0.355712869420009	none	0.412894339773758	none	0.395904816085235	FALSE
tmem8a	DreINT0165213	chr1:9244274-9244370	97	chr1:9244371-9244510=9244095-9244273:-	none	0.661018570110795	none	0.642250330465541	none	0.646476960891594	FALSE
tmem8a	DreINT0165214	chr1:9242756-9244094	1339	chr1:9244095-9244273=9242609-9242755:-	none	0.278529945724027	none	0.347609418853348	none	0.371802471476327	FALSE
tmem8a	DreINT0165205	chr1:9236619-9242608	5990	chr1:9242609-9242755=9236502-9236618:-	none	0.341077625112869	none	0.415686605876955	none	0.375879120888235	FALSE
tmem8a	DreINT0165206	chr1:9236263-9236501	239	chr1:9236502-9236618=9235798-9236262:-	none	0.624037907178326	none	0.682223867419994	none	0.69959941712904	FALSE
emp1	DreINT0062972	chr1:44631861-44632841	981	chr1:44631605-44631860=44632842-44632958:+	none	0.934130134397331	none	0.924950962757165	none	0.952670420738449	TRUE
emp1	DreINT0062973	chr1:44632959-44635396	2438	chr1:44632842-44632958=44635397-44635505:+	none	0.592900439421713	none	0.638152630935001	none	0.523571311108569	TRUE
emp1	DreINT0062974	chr1:44635506-44635577	72	chr1:44635397-44635505=44635578-44635718:+	none	0.783310948190953	none	0.753939363439855	none	0.816283845064113	TRUE
emp1	DreINT0062975	chr1:44635719-44638242	2524	chr1:44635578-44635718=44638243-44638656:+	none	0.964514620374819	none	0.966169322147663	none	0.953897565668664	TRUE
ern2	DreINT0064529	chr1:8507913-8511459	3547	chr1:8511460-8511518=8507795-8507912:-	none	0.524476305989126	none	0.550980161220755	none	0.487862044797906	TRUE
ern2	DreINT0064540	chr1:8505569-8507794	2226	chr1:8507795-8507912=8505535-8505568:-	none	0.430833626219465	none	0.440880001624482	none	0.53701883122567	TRUE
ern2	DreINT0064543	chr1:8504066-8505534	1469	chr1:8505535-8505568=8503993-8504065:-	none	0.407335375554667	none	0.465123579232207	none	0.433395501706503	TRUE
ern2	DreINT0064544	chr1:8503914-8503992	79	chr1:8503993-8504065=8503841-8503913:-	none	0.683486186619997	none	0.697488019143025	none	0.676652489619056	TRUE
ern2	DreINT0064545	chr1:8502702-8503840	1139	chr1:8503841-8503913=8502579-8502701:-	none	0.575208145279515	none	0.60579971273957	none	0.639645202295657	TRUE
ern2	DreINT0064546	chr1:8502503-8502578	76	chr1:8502579-8502701=8502398-8502502:-	none	0.728563928566494	none	0.704284909549246	none	0.754234040588275	TRUE
ern2	DreINT0064547	chr1:8501161-8502397	1237	chr1:8502398-8502502=8500893-8501160:-	none	0.51423078238219	none	0.571851214942679	none	0.507206810466422	TRUE
ern2	DreINT0064548	chr1:8500077-8500892	816	chr1:8500893-8501160=8499998-8500076:-	none	0.448275664855708	none	0.50640986256527	none	0.54615818720397	TRUE
ern2	DreINT0064549	chr1:8499922-8499997	76	chr1:8499998-8500076=8499768-8499921:-	none	0.682129561086841	none	0.684970485133773	none	0.618337142039057	TRUE
ern2	DreINT0064530	chr1:8499673-8499767	95	chr1:8499768-8499921=8499545-8499672:-	none	0.582136327147392	none	0.57507411805054	none	0.623973696250113	TRUE
ern2	DreINT0064531	chr1:8499401-8499544	144	chr1:8499545-8499672=8499272-8499400:-	none	0.463275782687304	none	0.537688516995046	none	0.514267013052762	TRUE
ern2	DreINT0064532	chr1:8498344-8499271	928	chr1:8499272-8499400=8498124-8498343:-	none	0.305186530129983	none	0.359227792774664	none	0.432265246118619	TRUE
ern2	DreINT0064533	chr1:8497786-8498123	338	chr1:8498124-8498343=8497695-8497785:-	none	0.363957297565136	none	0.383437530309858	none	0.407503837366395	TRUE
ern2	DreINT0064534	chr1:8495985-8497694	1710	chr1:8497695-8497785=8495795-8495984:-	none	0.410690601744913	none	0.473858565404627	none	0.483530215552745	TRUE
ern2	DreINT0064535	chr1:8493708-8495794	2087	chr1:8495795-8495984=8493608-8493707:-	none	0.268855728183599	none	0.342021589049781	none	0.362391920917434	TRUE
ern2	DreINT0064536	chr1:8493438-8493607	170	chr1:8493608-8493707=8493238-8493437:-	none	0.421839883405711	none	0.507808155994689	none	0.53228458398985	TRUE
ern2	DreINT0064537	chr1:8491394-8493237	1844	chr1:8493238-8493437=8491246-8491393:-	none	0.41980708235291	none	0.471632356138267	none	0.557293507194943	TRUE
ern2	DreINT0064538	chr1:8490726-8491245	520	chr1:8491246-8491393=8490598-8490725:-	none	0.398083440887183	none	0.441483688305825	none	0.462903665066397	TRUE
ern2	DreINT0064539	chr1:8488526-8490597	2072	chr1:8490598-8490725=8488402-8488525:-	none	0.460733394154445	none	0.532205513391177	none	0.548112173022356	TRUE
ern2	DreINT0064541	chr1:8488271-8488401	131	chr1:8488402-8488525=8488203-8488270:-	none	0.458351623320155	none	0.448288330971449	none	0.612916079781231	TRUE
ern2	DreINT0064542	chr1:8485867-8488202	2336	chr1:8488203-8488270=8485696-8485866:-	none	0.471564704612349	none	0.520720072452284	none	0.430967857760159	TRUE
atic	DreINT0034715	chr1:4788108-4789266	1159	chr1:4787994-4788107=4789267-4789393:+	NOT_RETAINED	0.341576820044313	NOT_RETAINED	0.326946856348427	NOT_RETAINED	0.283361663806568	FALSE
atic	DreINT0034721	chr1:4789394-4792051	2658	chr1:4789267-4789393=4792052-4792195:+	NOT_RETAINED	0.234884663908598	NOT_RETAINED	0.306905072417592	NOT_RETAINED	0.314466329941436	FALSE
atic	DreINT0034722	chr1:4792196-4792577	382	chr1:4792052-4792195=4792578-4792666:+	NOT_RETAINED	0.373975902133515	NOT_RETAINED	0.387511007035395	NOT_RETAINED	0.364045016543124	FALSE
atic	DreINT0034723	chr1:4792667-4794495	1829	chr1:4792578-4792666=4794496-4794647:+	none	0.218968182219851	none	0.249198010928684	none	0.278399906219127	FALSE
atic	DreINT0034724	chr1:4794648-4797364	2717	chr1:4794496-4794647=4797365-4797521:+	NOT_RETAINED	0.319322230066468	NOT_RETAINED	0.393834322874704	NOT_RETAINED	0.377033141398713	FALSE
atic	DreINT0034725	chr1:4797522-4797590	69	chr1:4797365-4797521=4797591-4797716:+	none	0.517884512422887	none	0.475625585150882	none	0.477524894331351	FALSE
atic	DreINT0034726	chr1:4797717-4799487	1771	chr1:4797591-4797716=4799488-4799595:+	none	0.366004480927074	none	0.423326218732614	none	0.352926807917145	FALSE
atic	DreINT0034727	chr1:4799596-4799714	119	chr1:4799488-4799595=4799715-4799800:+	NOT_RETAINED	0.320691958654832	NOT_RETAINED	0.337104370371385	NOT_RETAINED	0.426710799489584	FALSE
atic	DreINT0034728	chr1:4799801-4800669	869	chr1:4799715-4799800=4800670-4800759:+	none	0.274917408379661	none	0.304761632163371	none	0.353090477123161	TRUE
atic	DreINT0034716	chr1:4800760-4801203	444	chr1:4800670-4800759=4801204-4801329:+	NOT_RETAINED	0.296563114014419	NOT_RETAINED	0.299425459686177	NOT_RETAINED	0.352249600505287	FALSE
atic	DreINT0034717	chr1:4801330-4802756	1427	chr1:4801204-4801329=4802757-4802849:+	NOT_RETAINED	0.233873455819985	NOT_RETAINED	0.253479578017107	NOT_RETAINED	0.234463322295824	FALSE
atic	DreINT0034718	chr1:4802850-4802929	80	chr1:4802757-4802849=4802930-4803112:+	none	0.236681144331827	none	0.262242747337723	none	0.207435156957735	FALSE
atic	DreINT0034719	chr1:4803113-4804189	1077	chr1:4802930-4803112=4804190-4804345:+	none	0.116714254336399	none	0.167193080064047	none	0.181153122381506	TRUE
atic	DreINT0034720	chr1:4804346-4805599	1254	chr1:4804190-4804345=4805600-4806325:+	none	0.742085488955494	none	0.743373556335133	none	0.773991707724414	FALSE
fgfbp2b	DreINT0068239	chr1:21995605-21996223	619	chr1:21996224-21997174=21995222-21995604:-	none	0.8715417801325	none	0.833287991296913	none	0.816617243471751	TRUE
si:dkeyp-80c12.8	DreINT0148033	chr1:48714313-48717425	3113	chr1:48717426-48717485=48714163-48714312:-	none	0.640127900844356	none	0.613359891420897	none	0.529267558710865	TRUE
si:dkeyp-80c12.8	DreINT0148034	chr1:48713630-48714162	533	chr1:48714163-48714312=48713275-48713629:-	none	0.801227968073212	none	0.794967898792425	none	0.823651644084181	TRUE
htt	DreINT0079572	chr1:40666663-40671232	4570	chr1:40671233-40671330=40666579-40666662:-	none	0.329987482690145	none	0.35463523212399	none	0.390793645723738	FALSE
htt	DreINT0079583	chr1:40664249-40666578	2330	chr1:40666579-40666662=40664128-40664248:-	none	0.223152177292643	none	0.299355251360688	none	0.306769500795554	TRUE
htt	DreINT0079594	chr1:40664014-40664127	114	chr1:40664128-40664248=40663954-40664013:-	NOT_RETAINED	0.437690294894164	NOT_RETAINED	0.396453092469866	NOT_RETAINED	0.513187136655799	FALSE
htt	DreINT0079604	chr1:40663626-40663953	328	chr1:40663954-40664013=40663546-40663625:-	none	0.283612834681504	none	0.329182515863518	none	0.273785066247854	TRUE
htt	DreINT0079607	chr1:40662138-40663545	1408	chr1:40663546-40663625=40661999-40662137:-	NOT_RETAINED	0.240494546573234	NOT_RETAINED	0.298314863893841	NOT_RETAINED	0.391467951826901	FALSE
htt	DreINT0079618	chr1:40660305-40661998	1694	chr1:40661999-40662137=40660163-40660304:-	NOT_RETAINED	0.301134116172743	NOT_RETAINED	0.354457954312491	NOT_RETAINED	0.337914584472948	FALSE
htt	DreINT0079626	chr1:40660003-40660162	160	chr1:40660163-40660304=40659824-40660002:-	none	0.686422813515594	none	0.705230055321528	none	0.719291642982258	TRUE
htt	DreINT0079627	chr1:40658881-40659823	943	chr1:40659824-40660002=40658676-40658880:-	none	0.298373239924472	none	0.409609668543164	none	0.4349318752874	FALSE
htt	DreINT0079628	chr1:40657316-40658675	1360	chr1:40658676-40658880=40657271-40657315:-	NOT_RETAINED	0.272569344728749	NOT_RETAINED	0.327690609079926	NOT_RETAINED	0.371337118228074	FALSE
htt	DreINT0079573	chr1:40657095-40657270	176	chr1:40657271-40657315=40657017-40657094:-	none	0.401713864869129	none	0.442936296563074	none	0.444758062047624	FALSE
htt	DreINT0079574	chr1:40652573-40657016	4444	chr1:40657017-40657094=40652205-40652572:-	none	0.268620643101857	none	0.382703484554215	none	0.349980671990102	TRUE
htt	DreINT0079575	chr1:40649919-40652204	2286	chr1:40652205-40652572=40649795-40649918:-	none	0.406516475731229	none	0.537499169963924	none	0.518264783518794	TRUE
htt	DreINT0079576	chr1:40648573-40649794	1222	chr1:40649795-40649918=40648454-40648572:-	none	0.326895566369642	none	0.383280315509104	none	0.495342189125348	TRUE
htt	DreINT0079577	chr1:40648360-40648453	94	chr1:40648454-40648572=40648248-40648359:-	none	0.634553434587425	none	0.648392022471742	none	0.621517515613176	FALSE
htt	DreINT0079578	chr1:40648114-40648247	134	chr1:40648248-40648359=40647976-40648113:-	none	0.469496131063058	none	0.498984876452069	none	0.434979264283994	TRUE
htt	DreINT0079579	chr1:40647227-40647975	749	chr1:40647976-40648113=40647068-40647226:-	none	0.243978834992063	none	0.305591205072066	none	0.340289708088435	FALSE
htt	DreINT0079580	chr1:40646984-40647067	84	chr1:40647068-40647226=40646886-40646983:-	none	0.65787385019306	none	0.660174012250396	none	0.686868415732272	FALSE
htt	DreINT0079581	chr1:40643647-40646885	3239	chr1:40646886-40646983=40643507-40643646:-	none	0.459681649540847	none	0.495911139184983	IR_IN_SNIP1_KD	0.496562614316489	FALSE
htt	DreINT0079582	chr1:40643402-40643506	105	chr1:40643507-40643646=40643338-40643401:-	NOT_RETAINED	0.575250757738557	NOT_RETAINED	0.542854598215006	NOT_RETAINED	0.605411560640975	FALSE
htt	DreINT0079584	chr1:40642872-40643337	466	chr1:40643338-40643401=40642771-40642871:-	none	0.164339501808748	none	0.20029911824275	none	0.212850272241854	FALSE
htt	DreINT0079585	chr1:40642691-40642770	80	chr1:40642771-40642871=40642544-40642690:-	none	0.518451831081995	none	0.539012491599272	none	0.546952492940119	FALSE
htt	DreINT0079586	chr1:40641833-40642543	711	chr1:40642544-40642690=40641712-40641832:-	none	0.175466222738538	none	0.260531936125475	none	0.271678334920198	FALSE
htt	DreINT0079587	chr1:40640068-40641711	1644	chr1:40641712-40641832=40639922-40640067:-	none	0.193247586146019	none	0.254077652434405	none	0.298279246177732	FALSE
htt	DreINT0079588	chr1:40639773-40639921	149	chr1:40639922-40640067=40639621-40639772:-	none	0.408142455343189	none	0.41617224882311	none	0.485276990922671	FALSE
htt	DreINT0079589	chr1:40637779-40639620	1842	chr1:40639621-40639772=40637576-40637778:-	none	0.2285768841668	none	0.309571598935746	none	0.36385555923798	FALSE
htt	DreINT0079590	chr1:40637460-40637575	116	chr1:40637576-40637778=40637333-40637459:-	none	0.237218347358517	none	0.256632299411807	none	0.35787093260189	FALSE
htt	DreINT0079591	chr1:40637196-40637332	137	chr1:40637333-40637459=40637071-40637195:-	none	0.426789591023106	none	0.470612961694319	none	0.519484197260989	TRUE
htt	DreINT0079592	chr1:40635222-40637070	1849	chr1:40637071-40637195=40635111-40635221:-	none	0.360229513015938	none	0.376588319876361	none	0.51966930034132	FALSE
htt	DreINT0079593	chr1:40635015-40635110	96	chr1:40635111-40635221=40634937-40635014:-	none	0.437079108898987	none	0.413331046796084	none	0.483181976637352	FALSE
htt	DreINT0079595	chr1:40634854-40634936	83	chr1:40634937-40635014=40634630-40634853:-	none	0.586578222137823	none	0.56207240126974	none	0.559239711531686	FALSE
htt	DreINT0079596	chr1:40634537-40634629	93	chr1:40634630-40634853=40634458-40634536:-	none	0.571345020685357	none	0.565402449108957	none	0.607277364627827	FALSE
htt	DreINT0079597	chr1:40632624-40634457	1834	chr1:40634458-40634536=40632462-40632623:-	none	0.376122092841674	none	0.449341877426492	none	0.415029059947658	FALSE
htt	DreINT0079598	chr1:40632363-40632461	99	chr1:40632462-40632623=40632307-40632362:-	none	0.485049211084332	none	0.463901311569575	none	0.522233808994231	FALSE
htt	DreINT0079599	chr1:40631991-40632306	316	chr1:40632307-40632362=40631842-40631990:-	none	0.278397393535243	none	0.309292394902887	none	0.334404149005165	FALSE
htt	DreINT0079600	chr1:40630781-40631841	1061	chr1:40631842-40631990=40630644-40630780:-	none	0.316728833705084	none	0.412558424796191	none	0.404571993098739	FALSE
htt	DreINT0079601	chr1:40630549-40630643	95	chr1:40630644-40630780=40630432-40630548:-	none	0.680649926000602	none	0.67569305781451	none	0.666896120283148	FALSE
htt	DreINT0079602	chr1:40630313-40630431	119	chr1:40630432-40630548=40630190-40630312:-	NOT_RETAINED	0.429414171645894	NOT_RETAINED	0.460410462324506	NOT_RETAINED	0.487952067002054	FALSE
htt	DreINT0079603	chr1:40628998-40630189	1192	chr1:40630190-40630312=40628744-40628997:-	none	0.189597882192862	none	0.241111615551846	none	0.31268326680901	FALSE
htt	DreINT0079605	chr1:40613457-40615378	1922	chr1:40615379-40615589=40613311-40613456:-	none	0.325197796975477	none	0.386684968306062	none	0.433770871217166	FALSE
htt	DreINT0079606	chr1:40612220-40613310	1091	chr1:40613311-40613456=40612042-40612219:-	none	0.185349362473649	none	0.235362027053978	none	0.260435836784455	TRUE
htt	DreINT0079608	chr1:40611950-40612041	92	chr1:40612042-40612219=40611866-40611949:-	none	0.432177934755833	none	0.42386617235838	none	0.433214438765959	FALSE
htt	DreINT0079609	chr1:40610105-40611865	1761	chr1:40611866-40611949=40609920-40610104:-	NOT_RETAINED	0.392872983440025	NOT_RETAINED	0.481200560392104	NOT_RETAINED	0.411300163817674	FALSE
htt	DreINT0079610	chr1:40609830-40609919	90	chr1:40609920-40610104=40609703-40609829:-	none	0.542555850316647	none	0.543430993081758	none	0.552126003186442	FALSE
htt	DreINT0079611	chr1:40609463-40609702	240	chr1:40609703-40609829=40609359-40609462:-	none	0.22053833547808	none	0.287655799142641	none	0.307140206482577	FALSE
htt	DreINT0079612	chr1:40609286-40609358	73	chr1:40609359-40609462=40609131-40609285:-	none	0.582106414056143	none	0.577119577777528	IR_IN_SNIP1_KD	0.604352777268832	FALSE
htt	DreINT0079613	chr1:40607375-40609130	1756	chr1:40609131-40609285=40607235-40607374:-	none	0.569601958885431	none	0.648591508375945	none	0.642862945679992	FALSE
htt	DreINT0079614	chr1:40606948-40607234	287	chr1:40607235-40607374=40606865-40606947:-	none	0.591313134056779	none	0.607654169776181	none	0.618170132225678	FALSE
htt	DreINT0079615	chr1:40606754-40606864	111	chr1:40606865-40606947=40606623-40606753:-	none	0.401217509160897	none	0.404249631770885	none	0.436231864593382	FALSE
htt	DreINT0079616	chr1:40606502-40606622	121	chr1:40606623-40606753=40606369-40606501:-	none	0.566212615033623	none	0.571896517220968	none	0.631089223173446	FALSE
htt	DreINT0079617	chr1:40602398-40606368	3971	chr1:40606369-40606501=40602242-40602397:-	none	0.257049239921286	none	0.311409932198443	none	0.43306971439553	FALSE
htt	DreINT0079619	chr1:40602167-40602241	75	chr1:40602242-40602397=40601976-40602166:-	none	0.673079534934746	none	0.644493841271765	IR_IN_SNIP1_KD	0.630292197007946	FALSE
htt	DreINT0079620	chr1:40599598-40601975	2378	chr1:40601976-40602166=40599483-40599597:-	none	0.264873706126466	none	0.307109544858612	none	0.39163755353358	FALSE
htt	DreINT0079621	chr1:40597478-40599482	2005	chr1:40599483-40599597=40597246-40597477:-	none	0.0995614193279937	none	0.154819746393012	none	0.201754042453866	FALSE
htt	DreINT0079622	chr1:40595765-40597245	1481	chr1:40597246-40597477=40595659-40595764:-	none	0.24391277911493	none	0.337530681216998	none	0.407825051575723	FALSE
htt	DreINT0079623	chr1:40595577-40595658	82	chr1:40595659-40595764=40595414-40595576:-	none	0.63873027761311	none	0.630098757662855	none	0.605589207827521	FALSE
htt	DreINT0079624	chr1:40594804-40595413	610	chr1:40595414-40595576=40594643-40594803:-	none	0.304475350408635	none	0.338069620380791	none	0.376751507649502	FALSE
htt	DreINT0079625	chr1:40592805-40594642	1838	chr1:40594643-40594803=40591177-40592804:-	none	0.948037301119312	none	0.947576196325502	none	0.9717042927102	FALSE
sorbs2a	DreINT0154371	chr1:17106816-17110581	3766	chr1:17110582-17110677=17106691-17106815:-	none	0.420724614848597	none	0.479544347215073	none	0.442268706312224	TRUE
sorbs2a	DreINT0154382	chr1:17100061-17106690	6630	chr1:17106691-17106815=17099934-17100060:-	none	0.247623325430558	none	0.328788387959003	none	0.449902311074997	TRUE
sorbs2a	DreINT0154384	chr1:17096684-17099933	3250	chr1:17099934-17100060=17096508-17096683:-	none	0.22020818111388	none	0.282637044688879	none	0.327696386501483	TRUE
sorbs2a	DreINT0154385	chr1:17093960-17096507	2548	chr1:17096508-17096683=17093893-17093959:-	none	0.263015469710077	none	0.355909836645004	none	0.35590095500067	TRUE
sorbs2a	DreINT0154386	chr1:17093201-17093892	692	chr1:17093893-17093959=17093150-17093200:-	none	0.225563459546822	none	0.25437272059244	none	0.359565620751316	TRUE
sorbs2a	DreINT0154387	chr1:17091554-17093149	1596	chr1:17093150-17093200=17091349-17091553:-	none	0.243241252084787	none	0.300729177312772	none	0.211933099275934	TRUE
sorbs2a	DreINT0154388	chr1:17091281-17091348	68	chr1:17091349-17091553=17091166-17091280:-	none	0.776767840131695	none	0.758317950309561	none	0.788292538544029	TRUE
sorbs2a	DreINT0154389	chr1:17086309-17091165	4857	chr1:17091166-17091280=17086225-17086308:-	none	0.322818857429875	none	0.321669749231643	none	0.57361082007962	TRUE
sorbs2a	DreINT0154390	chr1:17077598-17086224	8627	chr1:17086225-17086308=17077541-17077597:-	none	0.271205003790429	none	0.432907156117539	none	0.439511169194361	TRUE
sorbs2a	DreINT0154372	chr1:17073522-17077540	4019	chr1:17077541-17077597=17073475-17073521:-	none	0.341096068952314	none	0.384198260059047	none	0.477382633924917	TRUE
sorbs2a	DreINT0154373	chr1:17070480-17073474	2995	chr1:17073475-17073521=17070304-17070479:-	none	0.441643770562397	none	0.545998434374384	none	0.477740785656359	TRUE
sorbs2a	DreINT0154374	chr1:17069846-17070303	458	chr1:17070304-17070479=17068178-17069845:-	none	0.862937935397666	none	0.870114342109599	none	0.857526863590424	TRUE
sorbs2a	DreINT0154375	chr1:17067399-17068177	779	chr1:17068178-17069845=17067337-17067398:-	none	0.488178189249131	none	0.474631433204128	none	0.590179580354571	TRUE
sorbs2a	DreINT0154376	chr1:17067060-17067336	277	chr1:17067337-17067398=17066962-17067059:-	none	0.495295149504373	none	0.537156564885257	none	0.600410814617419	TRUE
sorbs2a	DreINT0154377	chr1:17064789-17066961	2173	chr1:17066962-17067059=17064674-17064788:-	none	0.356380413936512	none	0.430097586137253	none	0.390046344595584	TRUE
sorbs2a	DreINT0154378	chr1:17064574-17064673	100	chr1:17064674-17064788=17064445-17064573:-	none	0.482993545522713	none	0.503160309086736	none	0.472979374575279	TRUE
sorbs2a	DreINT0154379	chr1:17064360-17064444	85	chr1:17064445-17064573=17064189-17064359:-	none	0.634322352704949	none	0.616813059840413	none	0.612149373150535	TRUE
sorbs2a	DreINT0154380	chr1:17056802-17064188	7387	chr1:17064189-17064359=17056764-17056801:-	none	0.301044146834289	none	0.384404788775222	none	0.413348812011031	TRUE
sorbs2a	DreINT0154381	chr1:17056683-17056763	81	chr1:17056764-17056801=17056576-17056682:-	none	0.119484717580817	none	0.150727439897718	none	0.19108500484703	TRUE
sorbs2a	DreINT0154383	chr1:17055074-17056575	1502	chr1:17056576-17056682=17054719-17055073:-	none	0.776536790652285	none	0.805299547941044	none	0.804337484137071	TRUE
STX3 (2 of 2)	DreINT0020381	chr1:44125320-44127050	1731	chr1:44125013-44125319=44127051-44127125:+	none	0.786825749930475	none	0.746394378425614	none	0.642941868877599	TRUE
STX3 (2 of 2)	DreINT0020383	chr1:44127126-44127208	83	chr1:44127051-44127125=44127209-44127308:+	none	0.602344556454869	none	0.557677891191656	none	0.606160320655413	TRUE
STX3 (2 of 2)	DreINT0020384	chr1:44127309-44127404	96	chr1:44127209-44127308=44127405-44127479:+	none	0.661260844234633	none	0.638873846794965	none	0.722776596007237	TRUE
STX3 (2 of 2)	DreINT0020385	chr1:44127480-44127574	95	chr1:44127405-44127479=44127575-44127645:+	none	0.352106423689165	none	0.330612675261075	none	0.399277390785697	TRUE
STX3 (2 of 2)	DreINT0020386	chr1:44127646-44127721	76	chr1:44127575-44127645=44127722-44127830:+	none	0.650285625942707	none	0.640550366710163	none	0.662648565204963	TRUE
STX3 (2 of 2)	DreINT0020387	chr1:44127831-44127942	112	chr1:44127722-44127830=44127943-44128016:+	none	0.632241976423337	none	0.637979389851429	none	0.615042261705785	TRUE
STX3 (2 of 2)	DreINT0020388	chr1:44128017-44130909	2893	chr1:44127943-44128016=44130910-44131044:+	none	0.275924466206587	none	0.343330244458912	none	0.449728036430075	TRUE
STX3 (2 of 2)	DreINT0020389	chr1:44131045-44131852	808	chr1:44130910-44131044=44131853-44131963:+	none	0.537614152258392	none	0.608726670551418	none	0.560282852479096	TRUE
STX3 (2 of 2)	DreINT0020390	chr1:44131964-44132686	723	chr1:44131853-44131963=44132687-44132960:+	none	0.532698109340251	none	0.580417404071592	none	0.632963807226508	TRUE
STX3 (2 of 2)	DreINT0020382	chr1:44132961-44133830	870	chr1:44132687-44132960=44133831-44133942:+	none	0.810004148340213	none	0.794298349722334	none	0.824866810008763	TRUE
wdr19	DreINT0175048	chr1:20845300-20845681	382	chr1:20845682-20845736=20845208-20845299:-	none	0.668947836012003	none	0.611614874048951	none	0.619818093426149	TRUE
wdr19	DreINT0175059	chr1:20844666-20845207	542	chr1:20845208-20845299=20844600-20844665:-	none	0.392443700435425	none	0.439315232565157	none	0.429838039440325	TRUE
wdr19	DreINT0175070	chr1:20844483-20844599	117	chr1:20844600-20844665=20844357-20844482:-	none	0.452329165051823	none	0.483875246488618	none	0.483562538872431	TRUE
wdr19	DreINT0175078	chr1:20844237-20844356	120	chr1:20844357-20844482=20844121-20844236:-	none	0.511243521384612	none	0.531145283920376	none	0.528604053227569	TRUE
wdr19	DreINT0175079	chr1:20843611-20844120	510	chr1:20844121-20844236=20843495-20843610:-	none	0.218482731176532	none	0.26957937317279	none	0.307208421269496	TRUE
wdr19	DreINT0175080	chr1:20843380-20843494	115	chr1:20843495-20843610=20843299-20843379:-	none	0.511166885084142	none	0.510092149026403	none	0.575372929386854	TRUE
wdr19	DreINT0175081	chr1:20842103-20843298	1196	chr1:20843299-20843379=20841990-20842102:-	none	0.287984268156746	none	0.316680640414767	none	0.315421936400556	TRUE
wdr19	DreINT0175082	chr1:20839775-20841989	2215	chr1:20841990-20842102=20839601-20839774:-	none	0.521490975412277	none	0.577504132169083	none	0.616177874139228	TRUE
wdr19	DreINT0175083	chr1:20836734-20839600	2867	chr1:20839601-20839774=20836663-20836733:-	none	0.41106060127577	none	0.453400930071189	none	0.463685823277481	TRUE
wdr19	DreINT0175049	chr1:20836592-20836662	71	chr1:20836663-20836733=20836419-20836591:-	none	0.800339187894081	none	0.767568694901149	none	0.684764012220001	TRUE
wdr19	DreINT0175050	chr1:20834441-20836418	1978	chr1:20836419-20836591=20834326-20834440:-	none	0.505305268818564	none	0.559349767004438	none	0.557427599760217	TRUE
wdr19	DreINT0175051	chr1:20834227-20834325	99	chr1:20834326-20834440=20834120-20834226:-	none	0.539173892245753	none	0.548250341307155	none	0.577166981913803	TRUE
wdr19	DreINT0175052	chr1:20834020-20834119	100	chr1:20834120-20834226=20833897-20834019:-	none	0.400940821011746	none	0.390442179775343	none	0.470070835623836	TRUE
wdr19	DreINT0175053	chr1:20833302-20833896	595	chr1:20833897-20834019=20833152-20833301:-	none	0.339144408367178	none	0.386998117508872	none	0.398295521620776	TRUE
wdr19	DreINT0175054	chr1:20833006-20833151	146	chr1:20833152-20833301=20832858-20833005:-	none	0.407932219072897	none	0.402033590277197	none	0.496715883834644	TRUE
wdr19	DreINT0175055	chr1:20829489-20832857	3369	chr1:20832858-20833005=20829281-20829488:-	none	0.484375829053657	none	0.518198616910706	none	0.496222835493295	TRUE
wdr19	DreINT0175056	chr1:20829126-20829280	155	chr1:20829281-20829488=20828966-20829125:-	none	0.442108929657567	none	0.445453413096998	none	0.440626791554228	TRUE
wdr19	DreINT0175057	chr1:20825871-20828965	3095	chr1:20828966-20829125=20825760-20825870:-	none	0.426435710984315	none	0.480472702688945	none	0.520815153100182	TRUE
wdr19	DreINT0175058	chr1:20825641-20825759	119	chr1:20825760-20825870=20825531-20825640:-	none	0.629632938069236	none	0.629985251341427	none	0.668232449062364	TRUE
wdr19	DreINT0175060	chr1:20823845-20825530	1686	chr1:20825531-20825640=20823787-20823844:-	none	0.468960459288494	none	0.50006635535644	none	0.494405489107722	TRUE
wdr19	DreINT0175061	chr1:20823447-20823786	340	chr1:20823787-20823844=20823300-20823446:-	none	0.53430659258419	none	0.551792916626569	none	0.447577766775429	TRUE
wdr19	DreINT0175062	chr1:20823184-20823299	116	chr1:20823300-20823446=20823101-20823183:-	none	0.837516859091047	none	0.838364419338171	none	0.876168917507418	TRUE
wdr19	DreINT0175063	chr1:20822992-20823100	109	chr1:20823101-20823183=20822908-20822991:-	none	0.235457512717885	none	0.231940186615853	none	0.289454242720512	TRUE
wdr19	DreINT0175064	chr1:20821226-20822907	1682	chr1:20822908-20822991=20821079-20821225:-	none	0.454772553055574	none	0.492032381158802	none	0.47953188470551	TRUE
wdr19	DreINT0175065	chr1:20820933-20821078	146	chr1:20821079-20821225=20820808-20820932:-	none	0.403651934506071	none	0.477233705161029	none	0.458614205232455	TRUE
wdr19	DreINT0175066	chr1:20816402-20820807	4406	chr1:20820808-20820932=20816292-20816401:-	none	0.443924902611696	none	0.505301966928905	none	0.555843371771347	TRUE
wdr19	DreINT0175067	chr1:20816073-20816291	219	chr1:20816292-20816401=20816004-20816072:-	none	0.583238532605703	none	0.637484458085324	none	0.625392255033824	TRUE
wdr19	DreINT0175068	chr1:20814625-20816003	1379	chr1:20816004-20816072=20814547-20814624:-	none	0.435738546195247	none	0.508886800257497	none	0.504641108970579	TRUE
wdr19	DreINT0175069	chr1:20813319-20814546	1228	chr1:20814547-20814624=20813222-20813318:-	none	0.362803802045492	none	0.364196842183455	none	0.381491162952516	TRUE
wdr19	DreINT0175071	chr1:20812774-20813221	448	chr1:20813222-20813318=20812649-20812773:-	none	0.486227296009182	none	0.504324853772982	none	0.496682131091493	TRUE
wdr19	DreINT0175072	chr1:20809277-20812648	3372	chr1:20812649-20812773=20809195-20809276:-	none	0.570791184646743	none	0.607699803755244	none	0.610714879114024	TRUE
wdr19	DreINT0175073	chr1:20808562-20809194	633	chr1:20809195-20809276=20808411-20808561:-	none	0.527347275854179	none	0.599417459657061	none	0.551158252542282	TRUE
wdr19	DreINT0175074	chr1:20807937-20808410	474	chr1:20808411-20808561=20807813-20807936:-	none	0.224164869692519	none	0.271941465600123	none	0.315486722654345	TRUE
wdr19	DreINT0175075	chr1:20807556-20807812	257	chr1:20807813-20807936=20807479-20807555:-	none	0.569887646565807	none	0.660647866679362	none	0.612025030349038	TRUE
wdr19	DreINT0175076	chr1:20807378-20807478	101	chr1:20807479-20807555=20807228-20807377:-	none	0.734567048504441	none	0.736232914423716	none	0.787262746190786	TRUE
wdr19	DreINT0175077	chr1:20803143-20807227	4085	chr1:20807228-20807377=20802913-20803142:-	none	0.729147373048487	none	0.716561550541387	none	0.818528788877081	TRUE
abcg2d	DreINT0024341	chr1:49942888-49946588	3701	chr1:49946589-49946800=49942828-49942887:-	none	0.441205781523213	none	0.523308383933528	none	0.495709550098464	TRUE
abcg2d	DreINT0024345	chr1:49942704-49942827	124	chr1:49942828-49942887=49942589-49942703:-	none	0.509677568916772	none	0.527389208773675	none	0.567293191206691	TRUE
abcg2d	DreINT0024346	chr1:49941335-49942588	1254	chr1:49942589-49942703=49941182-49941334:-	none	0.263107172620817	none	0.341961167249721	none	0.392013543549639	TRUE
abcg2d	DreINT0024347	chr1:49941044-49941181	138	chr1:49941182-49941334=49940886-49941043:-	none	0.543532013323789	none	0.557235267731064	none	0.536247107487699	TRUE
abcg2d	DreINT0024348	chr1:49940340-49940885	546	chr1:49940886-49941043=49940188-49940339:-	none	0.52918877354854	none	0.594816229413459	none	0.60873529768019	TRUE
abcg2d	DreINT0024349	chr1:49939663-49940187	525	chr1:49940188-49940339=49939573-49939662:-	none	0.468837288871737	none	0.508571224218807	none	0.592020375552846	TRUE
abcg2d	DreINT0024350	chr1:49938479-49939572	1094	chr1:49939573-49939662=49938219-49938478:-	none	0.578041371952241	none	0.664346899858836	none	0.569376566674833	TRUE
abcg2d	DreINT0024351	chr1:49932563-49938218	5656	chr1:49938219-49938478=49932462-49932562:-	none	0.191868092748053	none	0.279203547297913	none	0.301394357746428	TRUE
abcg2d	DreINT0024352	chr1:49927220-49932461	5242	chr1:49932462-49932562=49927095-49927219:-	none	0.416221056835726	none	0.40023774136711	none	0.667133319590419	TRUE
abcg2d	DreINT0024342	chr1:49925987-49927094	1108	chr1:49927095-49927219=49925802-49925986:-	none	0.40641260741767	none	0.467248389658069	none	0.437598414870444	TRUE
abcg2d	DreINT0024343	chr1:49924573-49925801	1229	chr1:49925802-49925986=49924483-49924572:-	none	0.430990450257065	none	0.521816023358603	none	0.534502243262277	TRUE
ZNF507 (6 of 11)	DreINT0023126	chr1:57957344-57958378	1035	chr1:57956899-57957343=57958379-57960128:+	IR_IN_BUD13_KD_F2NEW	0.967591283412031	IR_IN_RBMX2_KD	0.969534274866136	none	0.953882959762497	FALSE
tmem39a	DreINT0164927	chr1:43431-44331	901	chr1:44332-44565=43288-43430:-	none	0.654722043286997	none	0.713925570535463	none	0.609271464711332	FALSE
tmem39a	DreINT0164928	chr1:42702-43287	586	chr1:43288-43430=42479-42701:-	IR_IN_BUD13_KD_F2NEW	0.83438873935013	IR_IN_RBMX2_KD	0.887742630802214	IR_IN_SNIP1_KD	0.845125392824006	FALSE
tmem39a	DreINT0164929	chr1:42257-42478	222	chr1:42479-42701=42173-42256:-	none	0.761930818785262	none	0.8004849340886	none	0.860494956885254	FALSE
tmem39a	DreINT0164930	chr1:42089-42172	84	chr1:42173-42256=41934-42088:-	none	0.621921492958808	none	0.698657343406255	none	0.691745322252512	FALSE
tmem39a	DreINT0164931	chr1:41573-41933	361	chr1:41934-42088=41251-41572:-	IR_IN_BUD13_KD_F2NEW	0.764842348860696	none	0.808662095158652	IR_IN_SNIP1_KD	0.862675809921143	FALSE
tmem39a	DreINT0164932	chr1:40985-41250	266	chr1:41251-41572=40797-40984:-	none	0.366574916068059	none	0.442253804801141	none	0.484252635485762	FALSE
tmem39a	DreINT0164933	chr1:40440-40796	357	chr1:40797-40984=40319-40439:-	none	0.500086110679846	none	0.593824111436714	none	0.635751404978647	FALSE
tmem39a	DreINT0164934	chr1:40062-40318	257	chr1:40319-40439=39325-40061:-	none	0.926486844189923	none	0.934643449443254	none	0.954332236537475	FALSE
si:ch73-341p18.5	DreINT0141647	chr1:55029444-55029522	79	chr1:55029352-55029443=55029523-55029685:+	none	0.778336790983496	none	0.700851380902006	none	0.814824774053578	TRUE
chmp2bb	DreINT0046571	chr1:32826163-32826580	418	chr1:32825987-32826162=32826581-32826672:+	NOT_RETAINED	0.538972683910081	NOT_RETAINED	0.533708656579463	NOT_RETAINED	0.448999014278021	FALSE
chmp2bb	DreINT0046572	chr1:32826673-32828928	2256	chr1:32826581-32826672=32828929-32829123:+	none	0.228338179755646	none	0.244191761297739	none	0.33349871581504	FALSE
chmp2bb	DreINT0046573	chr1:32829124-32832035	2912	chr1:32828929-32829123=32832036-32832138:+	NOT_RETAINED	0.314760030568141	NOT_RETAINED	0.336486780547377	NOT_RETAINED	0.380560961176481	FALSE
chmp2bb	DreINT0046574	chr1:32832139-32832761	623	chr1:32832036-32832138=32832762-32832868:+	none	0.340467343233401	none	0.333848894677286	none	0.369729265144757	FALSE
chmp2bb	DreINT0046575	chr1:32832869-32835364	2496	chr1:32832762-32832868=32835365-32836677:+	none	0.890006349129324	none	0.893592768885248	none	0.86352779787788	FALSE
pcdh18a	DreINT0110935	chr1:12581105-12581360	256	chr1:12581361-12584322=12581016-12581104:-	none	0.982716507504601	none	0.952598434925336	none	0.945908341973661	TRUE
pcdh18a	DreINT0110936	chr1:12578655-12581015	2361	chr1:12581016-12581104=12578485-12578654:-	IR_IN_BUD13_KD_F2NEW	0.492577688807226	IR_IN_RBMX2_KD	0.554828926554129	none	0.482344467565638	FALSE
pcdh18a	DreINT0110937	chr1:12575595-12578484	2890	chr1:12578485-12578654=12574317-12575594:-	none	0.927444644249003	none	0.947185296354826	none	0.923236233218544	TRUE
si:dkeyp-75b4.10	DreINT0148007	chr1:9310734-9310810	77	chr1:9310700-9310733=9310811-9310883:+	none	0.617090864919053	none	0.556948300541479	none	0.564239189273818	TRUE
si:dkeyp-75b4.10	DreINT0148008	chr1:9310884-9312233	1350	chr1:9310811-9310883=9312234-9312331:+	none	0.416904534097622	none	0.413731151556926	none	0.411310436039989	TRUE
si:dkeyp-75b4.10	DreINT0148009	chr1:9312332-9314081	1750	chr1:9312234-9312331=9314082-9314216:+	none	0.320821172908423	none	0.365602170765265	none	0.360846834933984	TRUE
si:dkeyp-75b4.10	DreINT0148010	chr1:9314217-9315828	1612	chr1:9314082-9314216=9315829-9315940:+	none	0.510596181577788	none	0.528275778263944	none	0.498058966775974	TRUE
si:dkeyp-75b4.10	DreINT0148011	chr1:9315941-9316022	82	chr1:9315829-9315940=9316023-9316250:+	none	0.825341062102578	none	0.804958116978559	none	0.845124303086247	TRUE
RHOU (1 of 2)	DreINT0018133	chr1:53326425-53327800	1376	chr1:53327801-53328274=53326366-53326424:-	none	0.427738581782923	none	0.453984027436508	none	0.391411854360656	TRUE
RHOU (1 of 2)	DreINT0018134	chr1:53323770-53326365	2596	chr1:53326366-53326424=53323279-53323769:-	none	0.389879805182204	none	0.488249306203065	none	0.49356740769466	TRUE
RHOU (1 of 2)	DreINT0018135	chr1:53320844-53323278	2435	chr1:53323279-53323769=53320377-53320843:-	none	0.830625960292103	none	0.866016959693554	none	0.945424775930481	TRUE
hhip	DreINT0077754	chr1:35058735-35061651	2917	chr1:35058055-35058734=35061652-35061844:+	none	0.648793005455915	none	0.609146195968541	none	0.630139863541496	FALSE
hhip	DreINT0077758	chr1:35061845-35068366	6522	chr1:35061652-35061844=35068367-35068508:+	none	0.427670637961515	none	0.456454483064934	none	0.49110077406662	FALSE
hhip	DreINT0077759	chr1:35068509-35070870	2362	chr1:35068367-35068508=35070871-35071072:+	none	0.500842920702413	none	0.51327205628529	none	0.522737832842076	FALSE
hhip	DreINT0077760	chr1:35071073-35078085	7013	chr1:35070871-35071072=35078086-35078237:+	none	0.434027582863978	none	0.487233395520038	none	0.46193576209282	FALSE
hhip	DreINT0077761	chr1:35078238-35079717	1480	chr1:35078086-35078237=35079718-35079891:+	none	0.481909624188362	none	0.49761564549718	none	0.484723406148066	FALSE
hhip	DreINT0077762	chr1:35079892-35080013	122	chr1:35079718-35079891=35080014-35080157:+	none	0.543402338509529	none	0.499834976000908	none	0.488089534715446	FALSE
hhip	DreINT0077763	chr1:35080158-35081636	1479	chr1:35080014-35080157=35081637-35081758:+	none	0.382806443126104	none	0.432809493034975	none	0.419551945358757	FALSE
hhip	DreINT0077764	chr1:35081759-35082956	1198	chr1:35081637-35081758=35082957-35083080:+	none	0.362662587035752	none	0.431527463426888	none	0.412366521221494	FALSE
hhip	DreINT0077765	chr1:35083081-35083671	591	chr1:35082957-35083080=35083672-35083802:+	none	0.405660628002546	none	0.465054668445235	none	0.394649965120931	FALSE
hhip	DreINT0077755	chr1:35083803-35086552	2750	chr1:35083672-35083802=35086553-35086634:+	none	0.372310828469456	none	0.453930507008448	none	0.394203678545013	FALSE
hhip	DreINT0077756	chr1:35086635-35101308	14674	chr1:35086553-35086634=35101309-35101457:+	none	0.185236260412362	none	0.249205500612187	none	0.314570741987012	FALSE
hhip	DreINT0077757	chr1:35101458-35101556	99	chr1:35101309-35101457=35101557-35103836:+	none	0.99422733588397	none	0.988569842826979	none	0.989501053675855	FALSE
zgc:77880	DreINT0180623	chr1:9621672-9622779	1108	chr1:9621500-9621671=9622780-9622868:+	none	0.609420068423326	none	0.577655328977956	none	0.566518831868877	TRUE
zgc:77880	DreINT0180624	chr1:9622869-9623089	221	chr1:9622780-9622868=9623090-9623163:+	none	0.357679336283892	none	0.411488202537861	none	0.378754161403471	TRUE
zgc:77880	DreINT0180625	chr1:9623164-9624695	1532	chr1:9623090-9623163=9624696-9624808:+	none	0.354512434730146	none	0.454311976826517	none	0.375058717602146	FALSE
zgc:77880	DreINT0180626	chr1:9624809-9627220	2412	chr1:9624696-9624808=9627221-9627282:+	none	0.439069582489243	none	0.497336903198332	none	0.571456932087323	TRUE
zgc:77880	DreINT0180627	chr1:9627283-9627370	88	chr1:9627221-9627282=9627371-9627491:+	none	0.783463634520497	none	0.786657006816189	none	0.690818437654027	FALSE
zgc:77880	DreINT0180628	chr1:9627492-9627606	115	chr1:9627371-9627491=9627607-9627679:+	none	0.32130590050432	none	0.292615715655995	none	0.462246173778998	FALSE
zgc:77880	DreINT0180629	chr1:9627680-9628989	1310	chr1:9627607-9627679=9628990-9629134:+	none	0.285895959961891	none	0.361331192833319	none	0.299868812944417	FALSE
zgc:77880	DreINT0180630	chr1:9629135-9630231	1097	chr1:9628990-9629134=9630232-9631095:+	none	0.862060475832575	none	0.863169554407874	none	0.873453800460414	FALSE
GK2	DreINT0011957	chr1:27922251-27946140	23890	chr1:27946141-27946252=27922164-27922250:-	none	0.242915688201961	none	0.29741698169525	none	0.352480744939782	FALSE
GK2	DreINT0011958	chr1:27921677-27922163	487	chr1:27922164-27922250=27921590-27921676:-	none	0.805432810121084	none	0.819458155534916	none	0.843162678455666	FALSE
GK2	DreINT0011959	chr1:27921094-27921589	496	chr1:27921590-27921676=27920465-27921093:-	none	0.796308604644801	none	0.784267936186217	none	0.835691234631013	FALSE
si:dkey-7a20.9	DreINT0146856	chr1:46035309-46052177	16869	chr1:46052178-46052320=46034576-46035308:-	none	0.816142550475925	none	0.811400078028103	none	0.841670113095315	TRUE
sfrp2	DreINT0133814	chr1:24804667-24804777	111	chr1:24804778-24805304=24804586-24804666:-	none	0.733846946256666	none	0.616616191868985	none	0.630557054073904	FALSE
sfrp2	DreINT0133815	chr1:24801100-24804585	3486	chr1:24804586-24804666=24800495-24801099:-	none	0.85131828366212	none	0.845337761676151	none	0.851985332867366	TRUE
si:ch73-12o23.1	DreINT0140872	chr1:8839458-8842882	3425	chr1:8842883-8843089=8838837-8839457:-	none	0.624136866713641	none	0.587599298585727	none	0.512248782884694	TRUE
si:ch73-12o23.1	DreINT0140883	chr1:8836740-8838836	2097	chr1:8838837-8839457=8836594-8836739:-	none	0.259624018204693	none	0.359263172868551	none	0.380217880097175	FALSE
si:ch73-12o23.1	DreINT0140884	chr1:8836454-8836593	140	chr1:8836594-8836739=8836288-8836453:-	none	0.68729903372964	none	0.689581883664904	none	0.649784500675746	TRUE
si:ch73-12o23.1	DreINT0140885	chr1:8835908-8836287	380	chr1:8836288-8836453=8835811-8835907:-	none	0.437752413028137	none	0.447818208759225	none	0.513994710822056	FALSE
si:ch73-12o23.1	DreINT0140886	chr1:8833023-8835810	2788	chr1:8835811-8835907=8832903-8833022:-	none	0.403484008588902	none	0.435473278177074	none	0.447023814742862	TRUE
si:ch73-12o23.1	DreINT0140887	chr1:8832826-8832902	77	chr1:8832903-8833022=8832707-8832825:-	none	0.506551244786216	none	0.462712281071758	none	0.551066773955733	TRUE
si:ch73-12o23.1	DreINT0140888	chr1:8831419-8832706	1288	chr1:8832707-8832825=8831287-8831418:-	NOT_RETAINED	0.242542324670619	NOT_RETAINED	0.282541983917176	NOT_RETAINED	0.333834244164451	FALSE
si:ch73-12o23.1	DreINT0140889	chr1:8830038-8831286	1249	chr1:8831287-8831418=8829927-8830037:-	NOT_RETAINED	0.442928822824357	NOT_RETAINED	0.463629639594335	NOT_RETAINED	0.466629658848868	FALSE
si:ch73-12o23.1	DreINT0140890	chr1:8828621-8829926	1306	chr1:8829927-8830037=8828507-8828620:-	none	0.336280646441537	none	0.379755509784934	none	0.37649464523248	TRUE
si:ch73-12o23.1	DreINT0140873	chr1:8828420-8828506	87	chr1:8828507-8828620=8828335-8828419:-	none	0.642345570661002	none	0.59767560091872	none	0.608493952627044	TRUE
si:ch73-12o23.1	DreINT0140874	chr1:8828251-8828334	84	chr1:8828335-8828419=8828133-8828250:-	none	0.758111392484179	none	0.756878768436118	none	0.715073798366903	FALSE
si:ch73-12o23.1	DreINT0140875	chr1:8826991-8828132	1142	chr1:8828133-8828250=8826857-8826990:-	none	0.257390908071148	none	0.280169392594047	none	0.306883694530234	FALSE
si:ch73-12o23.1	DreINT0140876	chr1:8826489-8826856	368	chr1:8826857-8826990=8826337-8826488:-	none	0.384812000256339	none	0.399117014545353	none	0.480933982820358	FALSE
si:ch73-12o23.1	DreINT0140877	chr1:8824722-8826336	1615	chr1:8826337-8826488=8824573-8824721:-	none	0.276669786484992	none	0.351081493427233	none	0.369170727534379	FALSE
si:ch73-12o23.1	DreINT0140878	chr1:8824319-8824572	254	chr1:8824573-8824721=8824177-8824318:-	none	0.470476742585699	none	0.51176410787262	none	0.467387892969465	FALSE
si:ch73-12o23.1	DreINT0140879	chr1:8824080-8824176	97	chr1:8824177-8824318=8823981-8824079:-	NOT_RETAINED	0.706706938931831	NOT_RETAINED	0.694482034393656	NOT_RETAINED	0.656520748801981	FALSE
si:ch73-12o23.1	DreINT0140880	chr1:8821477-8823980	2504	chr1:8823981-8824079=8821312-8821476:-	none	0.383295672301952	none	0.481994992609071	none	0.4660064842703	FALSE
si:ch73-12o23.1	DreINT0140881	chr1:8819764-8821311	1548	chr1:8821312-8821476=8819617-8819763:-	none	0.413801933073502	none	0.504492598162422	none	0.476100562172503	FALSE
si:ch73-12o23.1	DreINT0140882	chr1:8817331-8819616	2286	chr1:8819617-8819763=8815534-8817330:-	none	0.973344230195099	none	0.97443892942433	none	0.964794176296853	FALSE
mief2	DreINT0096122	chr1:7837316-7840137	2822	chr1:7837212-7837315=7840138-7840252:+	none	0.611690025911613	none	0.618389589610965	none	0.461718097367041	TRUE
mief2	DreINT0096123	chr1:7840253-7841072	820	chr1:7840138-7840252=7841073-7841229:+	none	0.349581304388348	none	0.396939658313783	none	0.435494707474634	FALSE
mief2	DreINT0096124	chr1:7841230-7842801	1572	chr1:7841073-7841229=7842802-7843133:+	none	0.247204960527974	none	0.337900576210513	none	0.318738559882496	FALSE
mief2	DreINT0096125	chr1:7843134-7845625	2492	chr1:7842802-7843133=7845626-7847898:+	none	0.640398116419486	none	0.703457744625112	none	0.772069055603851	TRUE
TSC2	DreINT0021747	chr1:53524255-53526439	2185	chr1:53524137-53524254=53526440-53526488:+	none	0.362578759188711	none	0.385154292256709	none	0.432734113559747	TRUE
TSC2	DreINT0021757	chr1:53526489-53526797	309	chr1:53526440-53526488=53526798-53526923:+	none	0.857255021098362	none	0.899615276066703	none	0.818057641470241	TRUE
TSC2	DreINT0021766	chr1:53526924-53527023	100	chr1:53526798-53526923=53527024-53527097:+	NOT_RETAINED	0.610082849849142	NOT_RETAINED	0.627065134734914	NOT_RETAINED	0.664625315795328	FALSE
TSC2	DreINT0021767	chr1:53527098-53527855	758	chr1:53527024-53527097=53527856-53527982:+	none	0.438957383528038	none	0.568397645441442	none	0.515777643975717	TRUE
TSC2	DreINT0021768	chr1:53527983-53528058	76	chr1:53527856-53527982=53528059-53528202:+	none	0.689369531765017	none	0.700906383477775	none	0.673304198620184	FALSE
TSC2	DreINT0021769	chr1:53528203-53531409	3207	chr1:53528059-53528202=53531410-53531547:+	NOT_RETAINED	0.489775800359258	NOT_RETAINED	0.552072027649341	NOT_RETAINED	0.560578991437153	FALSE
TSC2	DreINT0021770	chr1:53531548-53531634	87	chr1:53531410-53531547=53531635-53531738:+	none	0.641914029990495	none	0.644478870842514	none	0.672332402722907	FALSE
TSC2	DreINT0021771	chr1:53531739-53532086	348	chr1:53531635-53531738=53532087-53532168:+	none	0.409558420466375	none	0.468415393784458	none	0.549507422844371	TRUE
TSC2	DreINT0021737	chr1:53532169-53533768	1600	chr1:53532087-53532168=53533769-53533924:+	none	0.437889354799917	none	0.517371173411382	none	0.523542519666701	FALSE
TSC2	DreINT0021738	chr1:53533925-53534043	119	chr1:53533769-53533924=53534044-53534154:+	none	0.46737920137922	none	0.508505526130315	none	0.566702017395075	TRUE
TSC2	DreINT0021740	chr1:53534479-53534758	280	chr1:53534356-53534478=53534759-53534865:+	none	0.639218438051	none	0.665333852365087	none	0.610269223578701	TRUE
TSC2	DreINT0021741	chr1:53534866-53535943	1078	chr1:53534759-53534865=53535944-53536097:+	NOT_RETAINED	0.0379240990028353	NOT_RETAINED	0.0719283123107036	NOT_RETAINED	0.0889931429063625	FALSE
TSC2	DreINT0021742	chr1:53536098-53536836	739	chr1:53535944-53536097=53536837-53536959:+	none	0.453119311832045	none	0.525756430465182	none	0.567443079177215	TRUE
TSC2	DreINT0021743	chr1:53536960-53537481	522	chr1:53536837-53536959=53537482-53537616:+	none	0.435936005587052	none	0.533824952697517	none	0.56820905161873	TRUE
TSC2	DreINT0021744	chr1:53537617-53539217	1601	chr1:53537482-53537616=53539218-53539407:+	NOT_RETAINED	0.29565506189999	NOT_RETAINED	0.389082667915939	NOT_RETAINED	0.382576336509654	FALSE
TSC2	DreINT0021745	chr1:53539408-53540211	804	chr1:53539218-53539407=53540212-53540305:+	NOT_RETAINED	0.402558102032635	NOT_RETAINED	0.47780086145795	NOT_RETAINED	0.512882792177868	FALSE
TSC2	DreINT0021746	chr1:53540306-53541738	1433	chr1:53540212-53540305=53541739-53541841:+	none	0.365397364747268	none	0.398542148013508	none	0.45648689835032	TRUE
TSC2	DreINT0021748	chr1:53544301-53549953	5653	chr1:53544206-53544300=53549954-53550082:+	none	0.185057256956971	none	0.276041373449561	none	0.341554145822223	FALSE
TSC2	DreINT0021749	chr1:53550083-53563837	13755	chr1:53549954-53550082=53563838-53563999:+	none	0.161239997103521	none	0.275392544007678	none	0.296621936528011	FALSE
TSC2	DreINT0021750	chr1:53564000-53564231	232	chr1:53563838-53563999=53564232-53564387:+	none	0.419161930254294	none	0.540736771903082	none	0.508961852915387	FALSE
TSC2	DreINT0021751	chr1:53564388-53564496	109	chr1:53564232-53564387=53564497-53564609:+	none	0.563924257709626	none	0.567656979800933	none	0.604018024026367	FALSE
TSC2	DreINT0021752	chr1:53564610-53565535	926	chr1:53564497-53564609=53565536-53565790:+	none	0.230048198713708	none	0.306237737634889	none	0.317866279147513	TRUE
TSC2	DreINT0021753	chr1:53565791-53568020	2230	chr1:53565536-53565790=53568021-53568212:+	none	0.450335134040623	none	0.58141720976986	none	0.524196969416253	FALSE
TSC2	DreINT0021754	chr1:53568213-53570893	2681	chr1:53568021-53568212=53570894-53570962:+	none	0.275046090342029	none	0.393164090299087	none	0.412366839082815	TRUE
TSC2	DreINT0021755	chr1:53570963-53573485	2523	chr1:53570894-53570962=53573486-53573628:+	none	0.271936597487854	none	0.347184147973408	none	0.418345352422942	TRUE
TSC2	DreINT0021756	chr1:53573629-53575259	1631	chr1:53573486-53573628=53575260-53575798:+	none	0.328439685933796	none	0.408048502164364	none	0.387050095814504	FALSE
TSC2	DreINT0021758	chr1:53575799-53580622	4824	chr1:53575260-53575798=53580623-53580701:+	none	0.226037001474768	none	0.256487917578588	none	0.397542362626974	FALSE
TSC2	DreINT0021759	chr1:53580702-53582610	1909	chr1:53580623-53580701=53582611-53582697:+	none	0.293496166371949	none	0.356310353115359	none	0.431814715560699	TRUE
TSC2	DreINT0021760	chr1:53582698-53583317	620	chr1:53582611-53582697=53583318-53583504:+	none	0.256263384251781	none	0.318417990377407	none	0.325176929038905	TRUE
TSC2	DreINT0021761	chr1:53583505-53584648	1144	chr1:53583318-53583504=53584649-53584788:+	none	0.185111834259466	none	0.26686517983278	none	0.268486739952604	FALSE
TSC2	DreINT0021762	chr1:53584789-53584887	99	chr1:53584649-53584788=53584888-53584966:+	none	0.508429683300258	none	0.515126542023582	none	0.662639265616127	FALSE
TSC2	DreINT0021763	chr1:53584967-53585584	618	chr1:53584888-53584966=53585585-53585676:+	none	0.443561477688666	none	0.540376506667184	none	0.613899036906345	FALSE
TSC2	DreINT0021764	chr1:53585677-53591076	5400	chr1:53585585-53585676=53591077-53591175:+	none	0.316011136095189	none	0.3884320630893	none	0.419216686500593	FALSE
TSC2	DreINT0021765	chr1:53591176-53593487	2312	chr1:53591077-53591175=53593488-53594697:+	none	0.922475697843944	none	0.952091599618878	none	0.934799153645145	FALSE
si:dkey-167i21.2	DreINT0142954	chr1:18118430-18118508	79	chr1:18118509-18118580=18118312-18118429:-	none	0.757810726588945	none	0.700659174027659	none	0.64794792681056	TRUE
si:dkey-167i21.2	DreINT0142955	chr1:18118233-18118311	79	chr1:18118312-18118429=18117954-18118232:-	none	0.924988549021903	none	0.902206501491036	none	0.913101283585174	TRUE
erbb4a	DreINT0064244	chr1:6133732-6154295	20564	chr1:6133580-6133731=6154296-6154482:+	none	0.250053246478135	none	0.293814848989781	none	0.338161778119916	TRUE
erbb4a	DreINT0064255	chr1:6154483-6176692	22210	chr1:6154296-6154482=6176693-6176831:+	none	0.0874154988984986	none	0.113544852066783	none	0.257218065182771	TRUE
erbb4a	DreINT0064263	chr1:6176832-6177286	455	chr1:6176693-6176831=6177287-6177348:+	none	0.317493685435513	none	0.356341627486902	none	0.439366819480597	TRUE
erbb4a	DreINT0064264	chr1:6177349-6179211	1863	chr1:6177287-6177348=6179212-6179330:+	none	0.249210630343299	none	0.30365188392494	none	0.312290757254302	TRUE
erbb4a	DreINT0064265	chr1:6179331-6181006	1676	chr1:6179212-6179330=6181007-6181148:+	none	0.439283961865683	none	0.492530789233703	none	0.545691987824397	TRUE
erbb4a	DreINT0064266	chr1:6181149-6181341	193	chr1:6181007-6181148=6181342-6181455:+	none	0.507451819529828	none	0.572664274265827	none	0.573000644609657	TRUE
erbb4a	DreINT0064267	chr1:6181456-6185954	4499	chr1:6181342-6181455=6185955-6186081:+	none	0.264051714007919	none	0.342011083359139	none	0.431370826043322	TRUE
erbb4a	DreINT0064268	chr1:6186082-6186733	652	chr1:6185955-6186081=6186734-6186807:+	none	0.363934651717938	none	0.398165553311113	none	0.426558821727402	TRUE
erbb4a	DreINT0064269	chr1:6186808-6187481	674	chr1:6186734-6186807=6187482-6187572:+	none	0.277447797688677	none	0.353957324927119	none	0.417447037181217	TRUE
erbb4a	DreINT0064245	chr1:6187573-6189297	1725	chr1:6187482-6187572=6189298-6189497:+	none	0.201199440853707	none	0.260067849292086	none	0.296030455774323	TRUE
erbb4a	DreINT0064246	chr1:6189498-6192385	2888	chr1:6189298-6189497=6192386-6192518:+	none	0.350227853810017	none	0.383708790327283	none	0.466117030057614	TRUE
erbb4a	DreINT0064247	chr1:6192519-6194685	2167	chr1:6192386-6192518=6194686-6194779:+	none	0.327838565643853	none	0.398011302546091	none	0.369503945112967	TRUE
erbb4a	DreINT0064248	chr1:6194780-6196969	2190	chr1:6194686-6194779=6196970-6197124:+	none	0.144911000336653	none	0.207800826083915	none	0.258071858272489	TRUE
erbb4a	DreINT0064249	chr1:6197125-6197311	187	chr1:6196970-6197124=6197312-6197443:+	none	0.646923651950254	none	0.65466808491969	none	0.632755097425121	TRUE
erbb4a	DreINT0064250	chr1:6197444-6200117	2674	chr1:6197312-6197443=6200118-6200162:+	none	0.249353462880937	none	0.32069692206048	none	0.369440570541878	TRUE
erbb4a	DreINT0064251	chr1:6200163-6200830	668	chr1:6200118-6200162=6200831-6200963:+	none	0.102452798593117	none	0.174823405142182	none	0.167686881509239	TRUE
erbb4a	DreINT0064252	chr1:6200964-6204164	3201	chr1:6200831-6200963=6204165-6204287:+	none	0.327161457969999	none	0.435934579791392	none	0.383261990809714	TRUE
erbb4a	DreINT0064253	chr1:6204288-6204390	103	chr1:6204165-6204287=6204391-6204489:+	none	0.586317154348716	none	0.5908594886201	none	0.655815845051573	TRUE
erbb4a	DreINT0064254	chr1:6204490-6205311	822	chr1:6204391-6204489=6205312-6205497:+	none	0.427672426401478	none	0.475247075157969	none	0.473514656940555	TRUE
erbb4a	DreINT0064256	chr1:6226122-6226847	726	chr1:6225966-6226121=6226848-6226923:+	none	0.330775806813065	none	0.426190615780607	none	0.432629028645998	TRUE
erbb4a	DreINT0064257	chr1:6226924-6228221	1298	chr1:6226848-6226923=6228222-6228368:+	none	0.200280794003938	none	0.262462556174247	none	0.227050714503902	TRUE
erbb4a	DreINT0064258	chr1:6228369-6233134	4766	chr1:6228222-6228368=6233135-6233232:+	none	0.2297135789851	none	0.290362124791876	none	0.30458921674373	TRUE
erbb4a	DreINT0064259	chr1:6233233-6233352	120	chr1:6233135-6233232=6233353-6233523:+	none	0.56919061568318	none	0.563157686536392	none	0.57785977634052	TRUE
erbb4a	DreINT0064260	chr1:6233524-6234913	1390	chr1:6233353-6233523=6234914-6235214:+	none	0.144208862367878	none	0.200397865599855	none	0.234385455335653	TRUE
erbb4a	DreINT0064261	chr1:6235215-6240549	5335	chr1:6234914-6235214=6240550-6240717:+	none	0.701737939029887	none	0.756212876096543	none	0.794591830910138	TRUE
erbb4a	DreINT0064262	chr1:6240718-6241125	408	chr1:6240550-6240717=6241126-6241391:+	none	0.889426571124824	none	0.908133480325861	none	0.909369152793997	TRUE
si:ch211-14k19.8	DreINT0136353	chr1:8419428-8420451	1024	chr1:8420452-8420520=8419206-8419427:-	none	0.664157868760805	none	0.662224126464125	none	0.650003406150895	TRUE
si:ch211-14k19.8	DreINT0136354	chr1:8416730-8419205	2476	chr1:8419206-8419427=8416573-8416729:-	none	0.470751005869565	none	0.543395508772277	none	0.610133975353397	TRUE
si:ch211-14k19.8	DreINT0136355	chr1:8416497-8416572	76	chr1:8416573-8416729=8416336-8416496:-	none	0.779153151280128	none	0.747937315439411	none	0.817073131255913	TRUE
BX897691.1	DreINT0002611	chr1:34381777-34381929	153	chr1:34381930-34382152=34381713-34381776:-	none	0.803223364958425	none	0.771385446041528	none	0.714764665822912	TRUE
BX897691.1	DreINT0002612	chr1:34380701-34381712	1012	chr1:34381713-34381776=34380374-34380700:-	none	0.372525036482122	none	0.366295995383243	none	0.448575451121873	TRUE
BX897691.1	DreINT0002613	chr1:34380130-34380373	244	chr1:34380374-34380700=34380001-34380129:-	none	0.489598347641665	none	0.48665742443516	none	0.438511540398563	TRUE
BX897691.1	DreINT0002614	chr1:34379901-34380000	100	chr1:34380001-34380129=34379860-34379900:-	none	0.526491610401653	none	0.52452763236262	none	0.614308793384207	TRUE
BX897691.1	DreINT0002615	chr1:34379767-34379859	93	chr1:34379860-34379900=34378978-34379766:-	none	0.939667189224954	none	0.903231191475998	none	0.909760530876273	TRUE
fgfbp1b	DreINT0068237	chr1:21987505-21987681	177	chr1:21987682-21987732=21986690-21987504:-	none	0.891993438439869	IR_IN_RBMX2_KD	0.873021506153453	none	0.830517494226154	FALSE
si:dkey-56e3.2	DreINT0146249	chr1:40887122-40887202	81	chr1:40887006-40887121=40887203-40887258:+	none	0.485600580669438	none	0.402528297652661	none	0.469786867641313	FALSE
si:dkey-56e3.2	DreINT0146250	chr1:40887259-40891334	4076	chr1:40887203-40887258=40891335-40891569:+	none	0.461508364641878	none	0.521434606687255	none	0.517120841920657	TRUE
si:dkey-56e3.2	DreINT0146251	chr1:40891570-40891736	167	chr1:40891335-40891569=40891737-40892282:+	none	0.876794330642839	none	0.869238320979751	none	0.883657761378848	TRUE
zgc:152658	DreINT0178946	chr1:39422482-39425752	3271	chr1:39422425-39422481=39425753-39425871:+	none	0.642122688998824	none	0.638767610417017	none	0.563396740735842	TRUE
zgc:152658	DreINT0178947	chr1:39425872-39425976	105	chr1:39425753-39425871=39425977-39426019:+	none	0.560146966082133	none	0.545492852011434	none	0.592751309133705	TRUE
zgc:152658	DreINT0178948	chr1:39426020-39426125	106	chr1:39425977-39426019=39426126-39428709:+	none	0.990299794646954	none	0.980767977376125	none	0.971713842837944	TRUE
fam13a	DreINT0066134	chr1:50140920-50147251	6332	chr1:50147252-50147451=50140733-50140919:-	none	0.485218722420741	none	0.478305627309195	none	0.391365722898161	TRUE
fam13a	DreINT0066145	chr1:50136974-50140732	3759	chr1:50140733-50140919=50136764-50136973:-	none	0.238863108348756	none	0.284746982006483	none	0.39273972536744	TRUE
fam13a	DreINT0066152	chr1:50130656-50136763	6108	chr1:50136764-50136973=50130478-50130655:-	none	0.351500359112528	none	0.462749744232287	none	0.473083815990743	TRUE
fam13a	DreINT0066153	chr1:50122511-50130477	7967	chr1:50130478-50130655=50122363-50122510:-	none	0.323099557809838	none	0.358653980085393	none	0.453414840538035	TRUE
fam13a	DreINT0066154	chr1:50121841-50122362	522	chr1:50122363-50122510=50121754-50121840:-	none	0.465053328424864	none	0.540022454656931	none	0.543892089582742	TRUE
fam13a	DreINT0066155	chr1:50116756-50121753	4998	chr1:50121754-50121840=50116666-50116755:-	none	0.246846369706126	none	0.267582684663336	none	0.396471019117886	TRUE
fam13a	DreINT0066156	chr1:50112089-50116665	4577	chr1:50116666-50116755=50111996-50112088:-	none	0.396265534795602	none	0.387247481522275	none	0.45794912635446	TRUE
fam13a	DreINT0066157	chr1:50105708-50111995	6288	chr1:50111996-50112088=50105493-50105707:-	none	0.22248405406183	none	0.315467499206938	none	0.284751019264696	TRUE
fam13a	DreINT0066158	chr1:50093947-50105492	11546	chr1:50105493-50105707=50093905-50093946:-	none	0.201418632255523	none	0.222789844064466	none	0.458247988310637	TRUE
fam13a	DreINT0066135	chr1:50087067-50093904	6838	chr1:50093905-50093946=50087025-50087066:-	none	0.227604701406534	none	0.253834892567584	none	0.336087588751486	TRUE
fam13a	DreINT0066136	chr1:50086912-50087024	113	chr1:50087025-50087066=50086753-50086911:-	none	0.473972373956614	none	0.474274909678258	none	0.449328660186388	TRUE
fam13a	DreINT0066137	chr1:50081761-50086752	4992	chr1:50086753-50086911=50081595-50081760:-	none	0.3682397903454	none	0.477961479106662	none	0.457378162108669	TRUE
fam13a	DreINT0066138	chr1:50077067-50081594	4528	chr1:50081595-50081760=50076993-50077066:-	none	0.342027060511017	none	0.405198799508673	none	0.457419570313641	TRUE
fam13a	DreINT0066139	chr1:50075591-50076992	1402	chr1:50076993-50077066=50075551-50075590:-	none	0.369428955642624	none	0.42127616029519	none	0.408601045036839	TRUE
fam13a	DreINT0066140	chr1:50066679-50075550	8872	chr1:50075551-50075590=50066576-50066678:-	none	0.313580107039729	none	0.395125321166679	none	0.34819025745553	TRUE
fam13a	DreINT0066141	chr1:50059255-50066575	7321	chr1:50066576-50066678=50059038-50059254:-	none	0.194860805493621	none	0.277742143515191	none	0.302887247593678	FALSE
fam13a	DreINT0066142	chr1:50058959-50059037	79	chr1:50059038-50059254=50058817-50058958:-	none	0.702482280863637	IR_IN_RBMX2_KD	0.657276078875301	none	0.661843205074864	FALSE
fam13a	DreINT0066143	chr1:50057154-50058816	1663	chr1:50058817-50058958=50057072-50057153:-	none	0.437867855570767	none	0.44936902295144	none	0.478857581918499	FALSE
fam13a	DreINT0066144	chr1:50056838-50057071	234	chr1:50057072-50057153=50056632-50056837:-	none	0.533122026154587	none	0.587525255191267	none	0.542908308182592	FALSE
fam13a	DreINT0066146	chr1:50056541-50056631	91	chr1:50056632-50056837=50056457-50056540:-	none	0.554235442491742	none	0.552894419090573	none	0.612255299564789	FALSE
fam13a	DreINT0066147	chr1:50056370-50056456	87	chr1:50056457-50056540=50056274-50056369:-	none	0.56239920469779	none	0.552210040259336	none	0.563201467275468	FALSE
fam13a	DreINT0066148	chr1:50054321-50056273	1953	chr1:50056274-50056369=50054237-50054320:-	none	0.512169499875312	none	0.581511243437222	none	0.474665308557836	FALSE
fam13a	DreINT0066149	chr1:50053801-50054236	436	chr1:50054237-50054320=50053607-50053800:-	none	0.450843000923969	none	0.508084383211949	none	0.566946916838472	FALSE
fam13a	DreINT0066150	chr1:50051522-50053606	2085	chr1:50053607-50053800=50051420-50051521:-	none	0.433595944073136	none	0.46494737567726	none	0.479883435704794	FALSE
fam13a	DreINT0066151	chr1:50051296-50051419	124	chr1:50051420-50051521=50050973-50051295:-	none	0.796335618731834	none	0.772602203775144	none	0.811155445386445	FALSE
FO904861.2	DreINT0011248	chr1:56751444-56751541	98	chr1:56751542-56751614=56751096-56751443:-	none	0.809532629511094	none	0.747319598014424	none	0.684770528182505	TRUE
FO904861.2	DreINT0011249	chr1:56748344-56750751	2408	chr1:56750752-56750997=56748098-56748343:-	none	0.557790281292071	none	0.627751354159054	none	0.569386549532812	TRUE
FO904861.2	DreINT0011250	chr1:56747691-56748097	407	chr1:56748098-56748343=56747615-56747690:-	none	0.644343500488546	none	0.673499844437655	none	0.661278623642221	TRUE
FO904861.2	DreINT0011251	chr1:56747378-56747614	237	chr1:56747615-56747690=56747341-56747377:-	none	0.490312532486422	none	0.521868541181896	none	0.484360627918996	TRUE
FO904861.2	DreINT0011252	chr1:56747229-56747340	112	chr1:56747341-56747377=56747148-56747228:-	none	0.646248161129251	none	0.637908557524248	none	0.717084012894396	TRUE
FO904861.2	DreINT0011253	chr1:56747004-56747147	144	chr1:56747148-56747228=56746938-56747003:-	none	0.340628070927807	none	0.402067954899427	none	0.406457274885331	TRUE
si:ch211-243a20.3	DreINT0138898	chr1:44660246-44663848	3603	chr1:44660095-44660245=44663849-44663982:+	none	0.513731972220297	none	0.526071487157042	none	0.418352965323837	TRUE
si:ch211-243a20.3	DreINT0138899	chr1:44663983-44667222	3240	chr1:44663849-44663982=44667223-44667352:+	none	0.274369440098565	none	0.327359823300315	none	0.388880975933327	TRUE
si:ch211-243a20.3	DreINT0138900	chr1:44667353-44674061	6709	chr1:44667223-44667352=44674062-44674627:+	none	0.685661696178952	none	0.723847153291618	none	0.77424059658174	TRUE
APLF (1 of 2)	DreINT0001211	chr1:50998107-50999394	1288	chr1:50998008-50998106=50999395-50999573:+	none	0.223122047772248	none	0.293888876652376	none	0.308463811085243	TRUE
APLF (1 of 2)	DreINT0001212	chr1:50999574-51002353	2780	chr1:50999395-50999573=51002354-51002643:+	none	0.407523244473393	none	0.536950743259675	none	0.544844699814727	TRUE
APLF (1 of 2)	DreINT0001213	chr1:51002644-51008420	5777	chr1:51002354-51002643=51008421-51008549:+	none	0.455512395466587	none	0.538478570409249	none	0.560688827723641	TRUE
APLF (1 of 2)	DreINT0001214	chr1:51008550-51009112	563	chr1:51008421-51008549=51009113-51009159:+	none	0.427815555416029	none	0.474534679068747	none	0.528340795318324	TRUE
APLF (1 of 2)	DreINT0001215	chr1:51009160-51016496	7337	chr1:51009113-51009159=51016497-51016982:+	none	0.704798255224418	none	0.710346934215694	none	0.756921864331648	TRUE
EFCAB6	DreINT0009700	chr1:16940007-16957201	17195	chr1:16957202-16957286=16939907-16940006:-	none	0.222291999360125	none	0.273405332158868	none	0.354947486988716	TRUE
EFCAB6	DreINT0009701	chr1:16939317-16939906	590	chr1:16939907-16940006=16939192-16939316:-	none	0.0475867515850918	none	0.0749787654674428	none	0.0749763653874103	TRUE
EFCAB6	DreINT0009702	chr1:16931448-16939191	7744	chr1:16939192-16939316=16931204-16931447:-	none	0.343632778173736	none	0.410332388775922	none	0.38238580208415	TRUE
EFCAB6	DreINT0009703	chr1:16927903-16931203	3301	chr1:16931204-16931447=16927730-16927902:-	none	0.331743369458868	none	0.398317821160742	none	0.477303399064977	TRUE
EFCAB6	DreINT0009704	chr1:16926926-16927729	804	chr1:16927730-16927902=16926778-16926925:-	none	0.27164276062734	none	0.315902312738848	none	0.385484469041497	TRUE
EFCAB6	DreINT0009705	chr1:16925578-16926777	1200	chr1:16926778-16926925=16925078-16925577:-	none	0.873278130279373	none	0.869886758964739	none	0.860774056289883	TRUE
khsrp	DreINT0085709	chr1:54291937-54294369	2433	chr1:54294370-54294585=54291831-54291936:-	none	0.184969910505629	none	0.224394080247702	none	0.220511363924678	FALSE
khsrp	DreINT0085718	chr1:54291746-54291830	85	chr1:54291831-54291936=54291692-54291745:-	none	0.387416895670803	none	0.393730897760998	none	0.398242648749014	TRUE
khsrp	DreINT0085719	chr1:54291605-54291691	87	chr1:54291692-54291745=54291568-54291604:-	none	0.289984671718618	none	0.29772551214275	none	0.314818568798533	FALSE
khsrp	DreINT0085720	chr1:54290642-54291567	926	chr1:54291568-54291604=54290583-54290641:-	none	0.201787912066699	none	0.245229446717198	none	0.269295554121247	FALSE
khsrp	DreINT0085721	chr1:54289974-54290582	609	chr1:54290583-54290641=54289902-54289973:-	none	0.0969492871711067	none	0.128546764463094	none	0.127664732276379	FALSE
khsrp	DreINT0085722	chr1:54289799-54289901	103	chr1:54289902-54289973=54289741-54289798:-	none	0.468843574870181	none	0.482926039650875	none	0.499986636903269	FALSE
khsrp	DreINT0085723	chr1:54289654-54289740	87	chr1:54289741-54289798=54289488-54289653:-	none	0.129511394849213	none	0.13808582223246	none	0.154322795736446	FALSE
khsrp	DreINT0085724	chr1:54288829-54289487	659	chr1:54289488-54289653=54288730-54288828:-	none	0.382079372397142	none	0.441930826321145	none	0.48730467525636	FALSE
khsrp	DreINT0085725	chr1:54288397-54288729	333	chr1:54288730-54288828=54288262-54288396:-	none	0.204984630684817	none	0.257132959892578	none	0.192618928988773	FALSE
khsrp	DreINT0085710	chr1:54288185-54288261	77	chr1:54288262-54288396=54288082-54288184:-	none	0.391568195759315	none	0.362343845050665	none	0.374664649139358	TRUE
khsrp	DreINT0085711	chr1:54287737-54288081	345	chr1:54288082-54288184=54287615-54287736:-	none	0.0891649298506492	none	0.102499068026462	none	0.1117123452834	FALSE
khsrp	DreINT0085712	chr1:54287244-54287614	371	chr1:54287615-54287736=54286938-54287243:-	none	0.243907674370099	none	0.29111948508934	none	0.239909497843995	FALSE
khsrp	DreINT0085713	chr1:54286857-54286937	81	chr1:54286938-54287243=54286747-54286856:-	none	0.407601107340849	none	0.368884614715442	none	0.360835785403341	FALSE
khsrp	DreINT0085714	chr1:54286643-54286746	104	chr1:54286747-54286856=54286569-54286642:-	none	0.284418174225713	none	0.325650345508493	none	0.399544119354087	FALSE
khsrp	DreINT0085715	chr1:54285782-54286568	787	chr1:54286569-54286642=54285581-54285781:-	none	0.132606785584912	none	0.187872196618068	none	0.149162480903552	FALSE
khsrp	DreINT0085716	chr1:54284847-54285580	734	chr1:54285581-54285781=54284662-54284846:-	none	0.100424264775973	none	0.132084949289847	none	0.101958305452638	FALSE
khsrp	DreINT0085717	chr1:54283459-54284661	1203	chr1:54284662-54284846=54282538-54283458:-	none	0.613282762458879	none	0.650660166767794	none	0.687382155164584	FALSE
TRIP10 (2 of 2)	DreINT0021673	chr1:58225048-58227729	2682	chr1:58224921-58225047=58227730-58227845:+	none	0.596916251203533	none	0.626916171184415	none	0.551464109014585	TRUE
TRIP10 (2 of 2)	DreINT0021679	chr1:58227846-58231850	4005	chr1:58227730-58227845=58231851-58231904:+	none	0.347170925485181	none	0.404818048388017	none	0.545097617682756	TRUE
TRIP10 (2 of 2)	DreINT0021680	chr1:58231905-58232644	740	chr1:58231851-58231904=58232645-58232792:+	none	0.631357511634914	none	0.726877260370178	none	0.60226711781943	TRUE
TRIP10 (2 of 2)	DreINT0021681	chr1:58232793-58232890	98	chr1:58232645-58232792=58232891-58232953:+	none	0.654764475910874	none	0.667010639916239	none	0.750695651049038	TRUE
TRIP10 (2 of 2)	DreINT0021682	chr1:58232954-58234117	1164	chr1:58232891-58232953=58234118-58234222:+	none	0.491720876246886	none	0.52350505921402	none	0.568639011453299	TRUE
TRIP10 (2 of 2)	DreINT0021683	chr1:58234223-58234506	284	chr1:58234118-58234222=58234507-58234635:+	none	0.732635358267872	none	0.761985705277178	none	0.734513443536216	TRUE
TRIP10 (2 of 2)	DreINT0021684	chr1:58234935-58235007	73	chr1:58234790-58234934=58235008-58235029:+	none	0.029873620618221	none	0.0264830197044918	none	0.0302508486053364	TRUE
TRIP10 (2 of 2)	DreINT0021674	chr1:58235271-58235407	137	chr1:58235135-58235270=58235408-58235431:+	none	0.428772371460478	none	0.419400901482569	none	0.719878629621512	TRUE
TRIP10 (2 of 2)	DreINT0021675	chr1:58235432-58235600	169	chr1:58235408-58235431=58235601-58235710:+	none	0.520844358116044	none	0.647507930136573	none	0.564664950007655	TRUE
TRIP10 (2 of 2)	DreINT0021676	chr1:58235711-58236038	328	chr1:58235601-58235710=58236039-58236063:+	none	0.552647597350188	none	0.608318251913867	none	0.685839272893381	TRUE
TRIP10 (2 of 2)	DreINT0021677	chr1:58236597-58236671	75	chr1:58236489-58236596=58236672-58236721:+	none	0.647217679795677	none	0.664116136469955	none	0.707089808490181	TRUE
TRIP10 (2 of 2)	DreINT0021678	chr1:58236722-58236962	241	chr1:58236672-58236721=58236963-58237098:+	none	0.875127231840994	none	0.887888057815876	none	0.941592487759876	TRUE
rdh8b	DreINT0125821	chr1:58587610-58590984	3375	chr1:58587428-58587609=58590985-58591146:+	none	0.684305276446106	none	0.703738480819784	none	0.646729662077624	TRUE
rdh8b	DreINT0125822	chr1:58591147-58591478	332	chr1:58590985-58591146=58591479-58591658:+	none	0.569802438690161	none	0.609584560030598	none	0.607324172292813	TRUE
rdh8b	DreINT0125823	chr1:58591659-58591739	81	chr1:58591479-58591658=58591740-58591833:+	none	0.754124676840073	none	0.770021950720344	none	0.786193944447858	TRUE
rdh8b	DreINT0125824	chr1:58591834-58594804	2971	chr1:58591740-58591833=58594805-58594988:+	none	0.573297753166548	none	0.677852411993411	none	0.635850204010177	TRUE
rdh8b	DreINT0125825	chr1:58594989-58595729	741	chr1:58594805-58594988=58595730-58597015:+	none	0.768074382609927	none	0.805140992931649	none	0.809413014828021	TRUE
CABZ01084616.1	DreINT0005286	chr1:57985989-57986068	80	chr1:57985769-57985988=57986069-57986185:+	none	0.76267659582856	none	0.68086967987187	none	0.717243123595923	TRUE
CABZ01084616.1	DreINT0005287	chr1:57986186-57986265	80	chr1:57986069-57986185=57986266-57986370:+	none	0.61715733476852	none	0.599927538231396	none	0.582957758008953	TRUE
CABZ01084616.1	DreINT0005288	chr1:57986371-57986551	181	chr1:57986266-57986370=57986552-57988492:+	none	0.888642258084756	none	0.883733490502611	none	0.84494129852842	TRUE
CABZ01084616.1	DreINT0005289	chr1:58015436-58015783	348	chr1:58015262-58015435=58015784-58015830:+	none	0.492279956650365	none	0.455148590145853	none	0.544690697233055	TRUE
CABZ01084616.1	DreINT0005290	chr1:58015831-58015907	77	chr1:58015784-58015830=58015908-58017637:+	none	0.988630740011506	none	0.976677909418935	none	0.981896350622297	TRUE
tet2	DreINT0162090	chr1:25663037-25680538	17502	chr1:25662646-25663036=25680539-25683275:+	none	0.934483715275617	none	0.949143266220115	none	0.876136431920764	FALSE
tet2	DreINT0162091	chr1:25683276-25683364	89	chr1:25680539-25683275=25683365-25683455:+	IR_IN_BUD13_KD_F2NEW	0.998624887037281	none	0.97845549807692	IR_IN_SNIP1_KD	0.99330504939445	FALSE
tet2	DreINT0162092	chr1:25683456-25683534	79	chr1:25683365-25683455=25683535-25683628:+	none	0.355605298448589	IR_IN_RBMX2_KD	0.323460298841178	none	0.329222648746988	FALSE
tet2	DreINT0162093	chr1:25683629-25683791	163	chr1:25683535-25683628=25683792-25684000:+	none	0.381460605573977	none	0.391368884117505	none	0.390149169010269	FALSE
tet2	DreINT0162094	chr1:25684001-25684129	129	chr1:25683792-25684000=25684130-25684280:+	none	0.363917438745086	none	0.337883524981114	none	0.379689137381312	FALSE
tet2	DreINT0162095	chr1:25684281-25684357	77	chr1:25684130-25684280=25684358-25684447:+	IR_IN_BUD13_KD_F2NEW	0.534765872218012	IR_IN_RBMX2_KD	0.475260538243439	IR_IN_SNIP1_KD	0.550163823992841	FALSE
tet2	DreINT0162096	chr1:25684448-25684640	193	chr1:25684358-25684447=25684641-25684778:+	none	0.410566308318656	IR_IN_RBMX2_KD	0.452976550788724	none	0.352373236349074	FALSE
tet2	DreINT0162097	chr1:25684779-25684945	167	chr1:25684641-25684778=25684946-25685279:+	none	0.344091829864035	none	0.386427420184654	none	0.359526196674268	FALSE
tet2	DreINT0162098	chr1:25685280-25689022	3743	chr1:25684946-25685279=25689023-25693594:+	none	0.998258940138355	none	0.998780508263902	none	0.995149235756664	FALSE
ints12	DreINT0081976	chr1:25749763-25749846	84	chr1:25749847-25750361=25749601-25749762:-	none	0.78339377154618	none	0.621420350298994	none	0.651032141129408	FALSE
ints12	DreINT0081977	chr1:25749507-25749600	94	chr1:25749601-25749762=25749322-25749506:-	none	0.568178867293558	none	0.511147395655732	none	0.563168632556025	FALSE
ints12	DreINT0081978	chr1:25748929-25749321	393	chr1:25749322-25749506=25748769-25748928:-	none	0.29262770172962	none	0.360216672948864	none	0.34449609770212	FALSE
ints12	DreINT0081979	chr1:25748685-25748768	84	chr1:25748769-25748928=25748532-25748684:-	none	0.468257760648396	none	0.418956575991736	IR_IN_SNIP1_KD	0.529811950311835	FALSE
ints12	DreINT0081980	chr1:25745702-25748531	2830	chr1:25748532-25748684=25744884-25745701:-	none	0.866615438128349	none	0.88816606177786	none	0.855383951099885	TRUE
FRMD7 (2 of 2)	DreINT0011596	chr1:9658914-9662961	4048	chr1:9662962-9663196=9658809-9658913:-	none	0.601406276267293	none	0.561920684735647	none	0.584312574686138	TRUE
FRMD7 (2 of 2)	DreINT0011597	chr1:9657832-9658808	977	chr1:9658809-9658913=9657789-9657831:-	none	0.381532085279427	none	0.472399986688939	none	0.489752724435698	TRUE
FRMD7 (2 of 2)	DreINT0011598	chr1:9656537-9657788	1252	chr1:9657789-9657831=9656458-9656536:-	none	0.580895350586737	none	0.59102238938102	none	0.535879283887565	TRUE
FRMD7 (2 of 2)	DreINT0011599	chr1:9656364-9656457	94	chr1:9656458-9656536=9656266-9656363:-	none	0.46463468648948	none	0.45111171958395	none	0.539801822457226	TRUE
FRMD7 (2 of 2)	DreINT0011600	chr1:9656171-9656265	95	chr1:9656266-9656363=9656056-9656170:-	none	0.667744698162046	none	0.627869572027081	none	0.675596382886794	TRUE
FRMD7 (2 of 2)	DreINT0011601	chr1:9654796-9656055	1260	chr1:9656056-9656170=9654648-9654795:-	none	0.549577893981278	none	0.559410712156776	none	0.457744744895045	TRUE
FRMD7 (2 of 2)	DreINT0011602	chr1:9653216-9654647	1432	chr1:9654648-9654795=9653120-9653215:-	none	0.435548216429101	none	0.468839879324068	none	0.454476487614245	TRUE
FRMD7 (2 of 2)	DreINT0011603	chr1:9652738-9653119	382	chr1:9653120-9653215=9652574-9652737:-	none	0.72199544200624	none	0.741039007688197	none	0.796915354505234	TRUE
ZFP91	DreINT0023012	chr1:39413767-39414040	274	chr1:39414041-39414758=39413732-39413766:-	none	0.798509261772489	none	0.779760099203571	none	0.750713704889606	FALSE
ZFP91	DreINT0023016	chr1:39410898-39413731	2834	chr1:39413732-39413766=39410796-39410897:-	none	0.320311609479026	none	0.392494535595936	none	0.373921062329866	FALSE
ZFP91	DreINT0023017	chr1:39410674-39410795	122	chr1:39410796-39410897=39410637-39410673:-	none	0.311652602100357	none	0.348677232985971	none	0.398086319653177	FALSE
ZFP91	DreINT0023018	chr1:39408300-39410636	2337	chr1:39410637-39410673=39408192-39408299:-	none	0.465735147290513	none	0.474577559502865	none	0.559168013698094	FALSE
ZFP91	DreINT0023019	chr1:39407547-39408191	645	chr1:39408192-39408299=39407454-39407546:-	none	0.533798953577002	none	0.540806101394325	none	0.48345178962464	FALSE
ZFP91	DreINT0023020	chr1:39405926-39407453	1528	chr1:39407454-39407546=39405848-39405925:-	none	0.250735292501835	none	0.280446017796704	none	0.359082621051687	FALSE
ZFP91	DreINT0023021	chr1:39405767-39405847	81	chr1:39405848-39405925=39405593-39405766:-	IR_IN_BUD13_KD_F2NEW	0.757157386291904	none	0.716502787621214	IR_IN_SNIP1_KD	0.709319710040964	FALSE
ZFP91	DreINT0023022	chr1:39405079-39405592	514	chr1:39405593-39405766=39405028-39405078:-	none	0.541263921833403	none	0.568188280682931	none	0.590923530019552	FALSE
ZFP91	DreINT0023023	chr1:39402302-39405027	2726	chr1:39405028-39405078=39402223-39402301:-	IR_IN_BUD13_KD_F2NEW	0.532878902371778	IR_IN_RBMX2_KD	0.529974583246615	IR_IN_SNIP1_KD	0.503846481788693	FALSE
ZFP91	DreINT0023013	chr1:39402145-39402222	78	chr1:39402223-39402301=39402030-39402144:-	IR_IN_BUD13_KD_F2NEW	0.520292045534055	IR_IN_RBMX2_KD	0.484749664523552	IR_IN_SNIP1_KD	0.47887755775354	FALSE
ZFP91	DreINT0023014	chr1:39401941-39402029	89	chr1:39402030-39402144=39401841-39401940:-	none	0.504678544479723	none	0.515771381720638	none	0.542693063425119	FALSE
ZFP91	DreINT0023015	chr1:39399720-39401840	2121	chr1:39401841-39401940=39398499-39399719:-	IR_IN_BUD13_KD_F2NEW	0.893575589106129	none	0.911060427711992	IR_IN_SNIP1_KD	0.887400514277422	FALSE
CR388002.1	DreINT0007732	chr1:13391429-13397643	6215	chr1:13391327-13391428=13397644-13397742:+	none	0.161656335594431	none	0.239820099092572	none	0.233492461855868	TRUE
CR388002.1	DreINT0007743	chr1:13397743-13400033	2291	chr1:13397644-13397742=13400034-13400132:+	none	0.335499301137187	none	0.387122289694332	none	0.49768528635074	TRUE
CR388002.1	DreINT0007754	chr1:13400133-13400305	173	chr1:13400034-13400132=13400306-13400404:+	NOT_RETAINED	0.136856102540075	NOT_RETAINED	0.172823600408387	NOT_RETAINED	0.194075864943125	FALSE
CR388002.1	DreINT0007765	chr1:13400405-13402871	2467	chr1:13400306-13400404=13402872-13403057:+	none	0.414834735977593	none	0.41330155470214	none	0.714348571108425	TRUE
CR388002.1	DreINT0007768	chr1:13403058-13404615	1558	chr1:13402872-13403057=13404616-13404639:+	none	0.228545777426523	none	0.289498399111032	none	0.302252159011893	TRUE
CR388002.1	DreINT0007769	chr1:13404640-13407519	2880	chr1:13404616-13404639=13407520-13407618:+	none	0.407643890537064	none	0.475895190767849	none	0.479277479630039	TRUE
CR388002.1	DreINT0007770	chr1:13407619-13410174	2556	chr1:13407520-13407618=13410175-13410273:+	none	0.281114071591958	none	0.379099102191294	none	0.376246937371241	FALSE
CR388002.1	DreINT0007771	chr1:13410274-13410547	274	chr1:13410175-13410273=13410548-13410646:+	none	0.362446442837941	none	0.459670932401081	none	0.449188268609473	FALSE
CR388002.1	DreINT0007722	chr1:13410647-13413386	2740	chr1:13410548-13410646=13413387-13413584:+	none	0.352411566208289	none	0.447727339369872	none	0.46449044471305	FALSE
CR388002.1	DreINT0007723	chr1:13413585-13413663	79	chr1:13413387-13413584=13413664-13413762:+	none	0.698033651707026	none	0.676010154164179	none	0.694637076934043	TRUE
CR388002.1	DreINT0007724	chr1:13413763-13416067	2305	chr1:13413664-13413762=13416068-13416166:+	none	0.423200424173478	none	0.469163448981515	none	0.573441592512323	TRUE
CR388002.1	DreINT0007725	chr1:13416167-13418218	2052	chr1:13416068-13416166=13418219-13418317:+	none	0.528382854056685	none	0.59958063386847	none	0.54259981005279	TRUE
CR388002.1	DreINT0007726	chr1:13418318-13418407	90	chr1:13418219-13418317=13418408-13418605:+	none	0.526394144843668	none	0.532930371331555	none	0.593367045487407	TRUE
CR388002.1	DreINT0007727	chr1:13418606-13421622	3017	chr1:13418408-13418605=13421623-13421721:+	none	0.306041114307443	none	0.396561993130657	none	0.4136244701436	TRUE
CR388002.1	DreINT0007728	chr1:13421722-13422065	344	chr1:13421623-13421721=13422066-13422164:+	none	0.216807162589707	none	0.261342894295793	none	0.274642639521455	FALSE
CR388002.1	DreINT0007729	chr1:13422165-13422385	221	chr1:13422066-13422164=13422386-13422583:+	none	0.381251572393241	none	0.407692958198457	none	0.430042888388756	FALSE
CR388002.1	DreINT0007730	chr1:13422584-13423673	1090	chr1:13422386-13422583=13423674-13423772:+	NOT_RETAINED	0.369644380415827	NOT_RETAINED	0.43372888339614	NOT_RETAINED	0.48822866815388	FALSE
CR388002.1	DreINT0007731	chr1:13423773-13423893	121	chr1:13423674-13423772=13423894-13423992:+	none	0.406295617454546	none	0.409418219006562	none	0.489580755915244	FALSE
CR388002.1	DreINT0007733	chr1:13423993-13424836	844	chr1:13423894-13423992=13424837-13424935:+	none	0.574439003714382	none	0.593229541057389	none	0.541405678286613	FALSE
CR388002.1	DreINT0007734	chr1:13424936-13425016	81	chr1:13424837-13424935=13425017-13425115:+	NOT_RETAINED	0.585838629715253	NOT_RETAINED	0.592828143425637	NOT_RETAINED	0.629766482950319	FALSE
CR388002.1	DreINT0007735	chr1:13425116-13425212	97	chr1:13425017-13425115=13425213-13425285:+	none	0.583346519611088	none	0.574620324178144	none	0.63304526671739	FALSE
CR388002.1	DreINT0007736	chr1:13425286-13425367	82	chr1:13425213-13425285=13425368-13425421:+	none	0.627295429019128	none	0.608796271884984	none	0.555707647338209	FALSE
CR388002.1	DreINT0007737	chr1:13425422-13428423	3002	chr1:13425368-13425421=13428424-13428547:+	none	0.29218731333755	none	0.366150894298857	none	0.334805317586691	FALSE
CR388002.1	DreINT0007738	chr1:13428548-13428800	253	chr1:13428424-13428547=13428801-13428885:+	none	0.296475075538116	none	0.374099839700431	none	0.380886213958114	FALSE
CR388002.1	DreINT0007739	chr1:13428886-13432236	3351	chr1:13428801-13428885=13432237-13432337:+	none	0.315446325047716	none	0.371987669434955	none	0.363213256198643	TRUE
CR388002.1	DreINT0007740	chr1:13432338-13432644	307	chr1:13432237-13432337=13432645-13432680:+	none	0.387564503841823	none	0.45344310055084	none	0.474920882390206	FALSE
CR388002.1	DreINT0007741	chr1:13432681-13433708	1028	chr1:13432645-13432680=13433709-13433933:+	none	0.385271673498747	none	0.445234614541241	none	0.521124181490155	FALSE
CR388002.1	DreINT0007742	chr1:13433934-13438338	4405	chr1:13433709-13433933=13438339-13438437:+	none	0.497765951238347	none	0.557167671442491	none	0.524920058770674	TRUE
CR388002.1	DreINT0007744	chr1:13438438-13438844	407	chr1:13438339-13438437=13438845-13438999:+	none	0.480610216898333	none	0.542854905932977	none	0.560151482761669	FALSE
CR388002.1	DreINT0007745	chr1:13439000-13440958	1959	chr1:13438845-13438999=13440959-13441170:+	none	0.417058270409455	none	0.493878441851322	none	0.47537317663225	FALSE
CR388002.1	DreINT0007746	chr1:13441171-13442596	1426	chr1:13440959-13441170=13442597-13442789:+	none	0.251107212779439	none	0.352987522080389	none	0.324340027971966	FALSE
CR388002.1	DreINT0007747	chr1:13442790-13442892	103	chr1:13442597-13442789=13442893-13442989:+	none	0.53797883199591	none	0.495802207193859	none	0.525310611391231	FALSE
CR388002.1	DreINT0007748	chr1:13442990-13445188	2199	chr1:13442893-13442989=13445189-13445417:+	none	0.381525485900812	none	0.445467176454076	none	0.45986356346508	FALSE
CR388002.1	DreINT0007749	chr1:13445418-13446472	1055	chr1:13445189-13445417=13446473-13446598:+	none	0.723826053398236	none	0.726645061792766	none	0.696379755816243	FALSE
CR388002.1	DreINT0007750	chr1:13446599-13446711	113	chr1:13446473-13446598=13446712-13446834:+	none	0.551151283274902	none	0.528806778421573	none	0.518918178819714	FALSE
CR388002.1	DreINT0007751	chr1:13446835-13448933	2099	chr1:13446712-13446834=13448934-13448966:+	none	0.479786969638259	none	0.494407337531932	none	0.499428295142961	FALSE
CR388002.1	DreINT0007752	chr1:13448967-13449064	98	chr1:13448934-13448966=13449065-13449086:+	none	0.403676944719847	none	0.390081018819098	none	0.476453410105561	TRUE
CR388002.1	DreINT0007753	chr1:13449087-13450627	1541	chr1:13449065-13449086=13450628-13456393:+	none	0.999241367889015	none	0.999482003100263	none	0.996346426526447	TRUE
CR388002.1	DreINT0007755	chr1:13456394-13457135	742	chr1:13450628-13456393=13457136-13457213:+	none	0.992605441661614	none	0.985455572895984	none	0.959005475628886	FALSE
CR388002.1	DreINT0007756	chr1:13457214-13457296	83	chr1:13457136-13457213=13457297-13457428:+	none	0.540902898501292	none	0.540390164079123	none	0.487711154102972	FALSE
CR388002.1	DreINT0007757	chr1:13457429-13457530	102	chr1:13457297-13457428=13457531-13457671:+	none	0.657532156668513	none	0.611702240933986	none	0.63419328732039	FALSE
CR388002.1	DreINT0007758	chr1:13457672-13457776	105	chr1:13457531-13457671=13457777-13457978:+	none	0.664096286950268	none	0.626816162957704	none	0.621017421089888	FALSE
CR388002.1	DreINT0007759	chr1:13457979-13458085	107	chr1:13457777-13457978=13458086-13458158:+	none	0.592715223485856	none	0.548891107558182	none	0.615653585395568	FALSE
CR388002.1	DreINT0007760	chr1:13458159-13458502	344	chr1:13458086-13458158=13458503-13461397:+	none	0.979198371979848	none	0.980029117737414	none	0.950770482720615	FALSE
CR388002.1	DreINT0007761	chr1:13461398-13463168	1771	chr1:13458503-13461397=13463169-13463258:+	none	0.896076934313717	IR_IN_RBMX2_KD	0.910228418016258	none	0.809182034803467	FALSE
CR388002.1	DreINT0007762	chr1:13463259-13463746	488	chr1:13463169-13463258=13463747-13463830:+	none	0.377805949992055	none	0.431638891190203	none	0.488033103826329	FALSE
CR388002.1	DreINT0007763	chr1:13463831-13465190	1360	chr1:13463747-13463830=13465191-13465355:+	none	0.389229908692387	none	0.416975956979846	none	0.449027791200815	FALSE
CR388002.1	DreINT0007764	chr1:13465356-13465875	520	chr1:13465191-13465355=13465876-13466049:+	none	0.513190776098917	none	0.582956184526656	none	0.529539551600791	FALSE
CR388002.1	DreINT0007766	chr1:13466050-13468564	2515	chr1:13465876-13466049=13468565-13468656:+	none	0.466567573143648	none	0.526605466743285	none	0.549143838785049	FALSE
CR388002.1	DreINT0007767	chr1:13468657-13471884	3228	chr1:13468565-13468656=13471885-13473738:+	none	0.942097059913528	none	0.956547226353621	none	0.94926277848177	FALSE
dpy30	DreINT0059827	chr1:50395847-50396501	655	chr1:50395759-50395846=50396502-50396542:+	none	0.273406208382966	none	0.312105192886598	none	0.212337206456824	FALSE
dpy30	DreINT0059828	chr1:50396543-50396617	75	chr1:50396502-50396542=50396618-50396665:+	none	0.200854097381404	IR_IN_RBMX2_KD	0.21237578313738	none	0.231791640989409	FALSE
dpy30	DreINT0059829	chr1:50396666-50397432	767	chr1:50396618-50396665=50397433-50397581:+	none	0.198710122452675	none	0.237994454255856	none	0.171337940357965	FALSE
dpy30	DreINT0059830	chr1:50397582-50398318	737	chr1:50397433-50397581=50398319-50398529:+	none	0.542535779658784	none	0.565988061287292	none	0.80584007040937	FALSE
scpp1	DreINT0131646	chr1:36685663-36685768	106	chr1:36685769-36685878=36685608-36685662:-	none	0.262704836964422	none	0.277327785031884	none	0.23048614534196	TRUE
scpp1	DreINT0131647	chr1:36685529-36685607	79	chr1:36685608-36685662=36685481-36685528:-	none	0.550011365106218	none	0.524840506939692	none	0.529532043129669	TRUE
scpp1	DreINT0131648	chr1:36685380-36685480	101	chr1:36685481-36685528=36685317-36685379:-	none	0.519068670611296	none	0.540534444659511	none	0.504641469185804	TRUE
scpp1	DreINT0131649	chr1:36684849-36685316	468	chr1:36685317-36685379=36684819-36684848:-	none	0.272993059366248	none	0.310799598364596	none	0.260504480698485	TRUE
scpp1	DreINT0131650	chr1:36684714-36684818	105	chr1:36684819-36684848=36684678-36684713:-	none	0.450180138337444	none	0.456083666499738	none	0.520276429745572	TRUE
scpp1	DreINT0131651	chr1:36684572-36684677	106	chr1:36684678-36684713=36684533-36684571:-	none	0.21707656534278	none	0.20265957661437	none	0.347830011407993	TRUE
scpp1	DreINT0131652	chr1:36683684-36684532	849	chr1:36684533-36684571=36683618-36683683:-	none	0.200041291698639	none	0.221970249103794	none	0.274226646817369	TRUE
scpp1	DreINT0131653	chr1:36683538-36683617	80	chr1:36683618-36683683=36683001-36683537:-	none	0.946997322272043	none	0.926188537314676	none	0.933062480596613	TRUE
lig4	DreINT0089180	chr1:28464122-28464492	371	chr1:28463910-28464121=28464493-28467542:+	none	0.997938847796006	none	0.996626338043945	none	0.99063121344427	TRUE
fip1l1b	DreINT0068589	chr1:13696588-13699144	2557	chr1:13696251-13696587=13699145-13699202:+	none	0.349670305073997	none	0.367564156314616	none	0.361124958965698	FALSE
fip1l1b	DreINT0068590	chr1:13699203-13700865	1663	chr1:13699145-13699202=13700866-13700980:+	none	0.292623259979394	none	0.33376329773676	none	0.324633535066855	TRUE
fip1l1b	DreINT0068591	chr1:13700981-13701084	104	chr1:13700866-13700980=13701085-13701191:+	none	0.401171344199504	none	0.40561635196541	none	0.453193453855212	FALSE
fip1l1b	DreINT0068592	chr1:13701192-13703462	2271	chr1:13701085-13701191=13703463-13703527:+	none	0.226034756293048	none	0.249337126591531	none	0.310206662059928	FALSE
fip1l1b	DreINT0068593	chr1:13703528-13703643	116	chr1:13703463-13703527=13703644-13703751:+	none	0.350437782198993	none	0.387780111646462	none	0.343774140019728	FALSE
fip1l1b	DreINT0068594	chr1:13703752-13703833	82	chr1:13703644-13703751=13703834-13703964:+	none	0.567879089043174	none	0.55852816147586	none	0.582222816299056	FALSE
fip1l1b	DreINT0068595	chr1:13703965-13705364	1400	chr1:13703834-13703964=13705365-13705480:+	none	0.258681236486229	none	0.269968631590856	none	0.312719269867934	FALSE
fip1l1b	DreINT0068596	chr1:13705481-13705637	157	chr1:13705365-13705480=13705638-13705691:+	none	0.369117221250964	none	0.399703858680682	none	0.425386428536505	FALSE
fip1l1b	DreINT0068597	chr1:13705692-13708915	3224	chr1:13705638-13705691=13708916-13709015:+	none	0.276017071663743	none	0.357729915398249	none	0.309827933495992	FALSE
nfixa	DreINT0104201	chr1:51269615-51326170	56556	chr1:51269049-51269614=51326171-51327368:+	none	0.155835738222413	none	0.204089921812742	none	0.541608528465835	TRUE
ldb2b	DreINT0088682	chr1:22140104-22143814	3711	chr1:22143815-22144085=22140001-22140103:-	none	0.390267254641106	none	0.429563773099821	none	0.372903981288063	TRUE
ldb2b	DreINT0088683	chr1:22138705-22140000	1296	chr1:22140001-22140103=22138532-22138704:-	none	0.316368503132768	none	0.363215601053743	none	0.394214878209734	TRUE
ldb2b	DreINT0088684	chr1:22132604-22138531	5928	chr1:22138532-22138704=22132481-22132603:-	none	0.329420036782986	none	0.347012060202092	none	0.474266453595855	FALSE
ldb2b	DreINT0088685	chr1:22129814-22132480	2667	chr1:22132481-22132603=22129730-22129813:-	none	0.485832202750147	none	0.535638866493418	none	0.486210856005841	TRUE
ldb2b	DreINT0088686	chr1:22129627-22129729	103	chr1:22129730-22129813=22129503-22129626:-	none	0.485121557293796	none	0.501071816123613	none	0.522976784214737	TRUE
ldb2b	DreINT0088687	chr1:22127060-22129502	2443	chr1:22129503-22129626=22127006-22127059:-	none	0.172949186661712	none	0.214519017200116	none	0.486587350508625	TRUE
ldb2b	DreINT0088688	chr1:22124227-22127005	2779	chr1:22127006-22127059=22124102-22124226:-	none	0.261856036164484	none	0.336191413584719	none	0.308049872051744	TRUE
ldb2b	DreINT0088689	chr1:22118183-22124101	5919	chr1:22124102-22124226=22114659-22118182:-	none	0.995237929065912	none	0.996389870895205	none	0.993603025250397	TRUE
CNGA1 (2 of 2)	DreINT0007020	chr1:43196691-43198068	1378	chr1:43198069-43198258=43196522-43196690:-	none	0.565322340604714	none	0.550993157485652	none	0.490937358151924	TRUE
CNGA1 (2 of 2)	DreINT0007021	chr1:43196056-43196521	466	chr1:43196522-43196690=43196014-43196055:-	none	0.424534558263141	none	0.42299306741718	none	0.533885091807827	TRUE
CNGA1 (2 of 2)	DreINT0007022	chr1:43195934-43196013	80	chr1:43196014-43196055=43195748-43195933:-	none	0.711479962637746	none	0.646133367671455	none	0.707304552553944	TRUE
CNGA1 (2 of 2)	DreINT0007023	chr1:43195647-43195747	101	chr1:43195748-43195933=43195542-43195646:-	none	0.671201374991821	none	0.633491442081792	none	0.654077558780709	TRUE
CNGA1 (2 of 2)	DreINT0007024	chr1:43195381-43195541	161	chr1:43195542-43195646=43195274-43195380:-	none	0.553847887022638	none	0.54946840540615	none	0.545303094061727	TRUE
CNGA1 (2 of 2)	DreINT0007025	chr1:43194869-43195273	405	chr1:43195274-43195380=43193074-43194868:-	none	0.971036136291608	none	0.971496179053899	none	0.953056052259078	TRUE
rnf175	DreINT0127686	chr1:9363377-9364281	905	chr1:9364282-9364403=9363340-9363376:-	none	0.654966743095313	none	0.650521212066814	none	0.627387473904037	FALSE
rnf175	DreINT0127687	chr1:9362051-9363339	1289	chr1:9363340-9363376=9362013-9362050:-	none	0.618895879824529	none	0.570782190990362	none	0.54385717501903	FALSE
rnf175	DreINT0127688	chr1:9360344-9362012	1669	chr1:9362013-9362050=9360202-9360343:-	none	0.38581134434076	none	0.430102194790182	none	0.362785227514078	FALSE
rnf175	DreINT0127689	chr1:9357869-9360201	2333	chr1:9360202-9360343=9357714-9357868:-	none	0.417193492730453	none	0.482031190504357	none	0.441581489850193	TRUE
rnf175	DreINT0127690	chr1:9357563-9357713	151	chr1:9357714-9357868=9357455-9357562:-	none	0.480561420156351	none	0.510014537875191	none	0.579179350258365	FALSE
rnf175	DreINT0127691	chr1:9356690-9357454	765	chr1:9357455-9357562=9356569-9356689:-	none	0.224870331011232	none	0.264504946847475	none	0.246009899840798	FALSE
rnf175	DreINT0127692	chr1:9356167-9356568	402	chr1:9356569-9356689=9356033-9356166:-	none	0.354004037696426	none	0.362352081187801	none	0.420887382568532	FALSE
rnf175	DreINT0127693	chr1:9355799-9356032	234	chr1:9356033-9356166=9355697-9355798:-	none	0.493769235416594	none	0.473854247700157	none	0.578573825139725	FALSE
rnf175	DreINT0127694	chr1:9353930-9355696	1767	chr1:9355697-9355798=9353333-9353929:-	none	0.852992963965871	none	0.871380650784664	none	0.899028025199255	FALSE
rtn4rl2a	DreINT0129726	chr1:43789935-43790655	721	chr1:43789774-43789934=43790656-43790882:+	none	0.519084703092261	none	0.521936822152512	none	0.446918744277152	TRUE
rtn4rl2a	DreINT0129727	chr1:43790883-43791068	186	chr1:43790656-43790882=43791069-43792245:+	none	0.987897253160712	none	0.982000543591944	none	0.97433899164136	TRUE
mdh1b	DreINT0094421	chr1:5526937-5527465	529	chr1:5527466-5527507=5526824-5526936:-	none	0.548377422710406	none	0.564602079900842	none	0.545636311527991	TRUE
mdh1b	DreINT0094422	chr1:5526597-5526823	227	chr1:5526824-5526936=5526462-5526596:-	none	0.450378095954547	none	0.503244919211572	none	0.518808421210597	TRUE
mdh1b	DreINT0094423	chr1:5524480-5526461	1982	chr1:5526462-5526596=5524337-5524479:-	none	0.410395420692675	none	0.442283852109389	none	0.523493188892216	TRUE
mdh1b	DreINT0094424	chr1:5524259-5524336	78	chr1:5524337-5524479=5524090-5524258:-	none	0.577913649270192	none	0.540118168374085	none	0.565049291540808	TRUE
mdh1b	DreINT0094425	chr1:5524018-5524089	72	chr1:5524090-5524258=5523756-5524017:-	none	0.858635746281569	none	0.818721585283804	none	0.817066588517167	TRUE
mdh1b	DreINT0094426	chr1:5523221-5523755	535	chr1:5523756-5524017=5523079-5523220:-	none	0.219794017943636	none	0.237255439194132	none	0.31885216681631	TRUE
mdh1b	DreINT0094427	chr1:5522853-5523078	226	chr1:5523079-5523220=5522677-5522852:-	none	0.530128639351403	none	0.497034183816008	none	0.571971601223923	TRUE
mdh1b	DreINT0094428	chr1:5521346-5522676	1331	chr1:5522677-5522852=5521206-5521345:-	none	0.4394637675385	none	0.476238619364001	none	0.534147190229654	TRUE
mdh1b	DreINT0094429	chr1:5521052-5521205	154	chr1:5521206-5521345=5520854-5521051:-	none	0.76756401324261	none	0.774936529316418	none	0.804825340788727	TRUE
eed	DreINT0061243	chr1:27956-29800	1845	chr1:27690-27955=29801-29953:+	none	0.63242937248054	none	0.715297955172987	none	0.637194817975364	FALSE
eed	DreINT0061246	chr1:29954-30079	126	chr1:29801-29953=30080-30172:+	IR_IN_BUD13_KD_F2NEW	0.745063135938138	IR_IN_RBMX2_KD	0.766043626255007	IR_IN_SNIP1_KD	0.842786533444503	FALSE
eed	DreINT0061247	chr1:30173-31228	1056	chr1:30080-30172=31229-31294:+	none	0.442224152142115	none	0.516985569520081	none	0.566250056852194	FALSE
eed	DreINT0061249	chr1:31526-31658	133	chr1:31400-31525=31659-31740:+	none	0.562082928563328	none	0.602065836343028	none	0.621723510285726	FALSE
eed	DreINT0061250	chr1:31741-31813	73	chr1:31659-31740=31814-31905:+	none	0.671810769243675	none	0.693643827222333	none	0.70467753622028	FALSE
eed	DreINT0061252	chr1:32244-32377	134	chr1:32110-32243=32378-32483:+	none	0.642552313853264	none	0.66121768234064	none	0.779083361760783	FALSE
eed	DreINT0061253	chr1:32484-32982	499	chr1:32378-32483=32983-33141:+	none	0.645518813516389	none	0.690237767339048	IR_IN_SNIP1_KD	0.722020308679587	FALSE
eed	DreINT0061244	chr1:33142-33505	364	chr1:32983-33141=33506-33579:+	none	0.652708779362895	none	0.699843849067667	none	0.749356364645102	FALSE
eed	DreINT0061245	chr1:33580-34120	541	chr1:33506-33579=34121-34330:+	none	0.896957010261186	IR_IN_RBMX2_KD	0.911859385522195	none	0.892087006094607	FALSE
chtf18	DreINT0046836	chr1:8515133-8517390	2258	chr1:8514920-8515132=8517391-8517558:+	none	0.540691214931269	none	0.567797513137139	none	0.479373891475257	TRUE
chtf18	DreINT0046847	chr1:8517559-8518953	1395	chr1:8517391-8517558=8518954-8519074:+	none	0.281154159856015	none	0.383834714006668	IR_IN_SNIP1_KD	0.372256509799235	FALSE
chtf18	DreINT0046850	chr1:8519075-8519162	88	chr1:8518954-8519074=8519163-8519388:+	none	0.399373007576159	none	0.349800136191786	none	0.455815771795654	TRUE
chtf18	DreINT0046851	chr1:8519389-8519478	90	chr1:8519163-8519388=8519479-8519571:+	none	0.523762248080801	none	0.472345515797009	none	0.56303164068703	TRUE
chtf18	DreINT0046852	chr1:8519572-8521546	1975	chr1:8519479-8519571=8521547-8521599:+	none	0.50282827760049	none	0.545199153944812	none	0.531082317473257	TRUE
chtf18	DreINT0046853	chr1:8521600-8521676	77	chr1:8521547-8521599=8521677-8521815:+	none	0.47672617118562	none	0.455370058411647	none	0.503072855031455	FALSE
chtf18	DreINT0046854	chr1:8521816-8522349	534	chr1:8521677-8521815=8522350-8522562:+	none	0.564448065157517	none	0.571391731806974	none	0.560689520536414	TRUE
chtf18	DreINT0046855	chr1:8522563-8523176	614	chr1:8522350-8522562=8523177-8523274:+	NOT_RETAINED	0.134665326264966	NOT_RETAINED	0.205923421256903	NOT_RETAINED	0.214141175651548	FALSE
chtf18	DreINT0046856	chr1:8523275-8523361	87	chr1:8523177-8523274=8523362-8523485:+	none	0.591779800042173	none	0.573538458550778	none	0.54175024654947	TRUE
chtf18	DreINT0046837	chr1:8523486-8523571	86	chr1:8523362-8523485=8523572-8523711:+	none	0.49180643763757	none	0.472131803197919	none	0.621622787632153	FALSE
chtf18	DreINT0046838	chr1:8523712-8525381	1670	chr1:8523572-8523711=8525382-8525475:+	NOT_RETAINED	0.325268452240804	NOT_RETAINED	0.394632391671315	NOT_RETAINED	0.381020891477085	FALSE
chtf18	DreINT0046839	chr1:8525476-8525565	90	chr1:8525382-8525475=8525566-8525664:+	NOT_RETAINED	0.560893918383354	NOT_RETAINED	0.554524051022842	NOT_RETAINED	0.62292840713075	FALSE
chtf18	DreINT0046840	chr1:8525665-8525735	71	chr1:8525566-8525664=8525736-8525866:+	none	0.68019655323308	none	0.675605539878046	IR_IN_SNIP1_KD	0.695716793263281	FALSE
chtf18	DreINT0046841	chr1:8525867-8527209	1343	chr1:8525736-8525866=8527210-8527333:+	none	0.527750772430395	none	0.575003991857271	none	0.573065633374461	TRUE
chtf18	DreINT0046842	chr1:8527334-8530377	3044	chr1:8527210-8527333=8530378-8530602:+	none	0.361930321548689	none	0.455202442258444	none	0.393211789782571	TRUE
chtf18	DreINT0046843	chr1:8530603-8532249	1647	chr1:8530378-8530602=8532250-8532399:+	none	0.39077472240943	none	0.480750960350775	none	0.438445276315951	FALSE
chtf18	DreINT0046844	chr1:8532400-8533926	1527	chr1:8532250-8532399=8533927-8534057:+	NOT_RETAINED	0.310247419794357	NOT_RETAINED	0.414499656143976	NOT_RETAINED	0.405652844279245	FALSE
chtf18	DreINT0046845	chr1:8534058-8538590	4533	chr1:8533927-8534057=8538591-8538735:+	none	0.297294682908309	none	0.369911655376106	none	0.457619192801972	FALSE
chtf18	DreINT0046846	chr1:8538736-8539561	826	chr1:8538591-8538735=8539562-8539678:+	none	0.271661725663391	none	0.330738379753917	none	0.363584220541775	FALSE
chtf18	DreINT0046848	chr1:8539679-8541331	1653	chr1:8539562-8539678=8541332-8541395:+	none	0.273126214422289	none	0.365583964382446	none	0.404091227289328	TRUE
chtf18	DreINT0046849	chr1:8541396-8542721	1326	chr1:8541332-8541395=8542722-8543093:+	none	0.842458765555709	none	0.83922538526983	none	0.85958186405432	TRUE
farp1	DreINT0067130	chr1:2154344-2173573	19230	chr1:2154180-2154343=2173574-2173763:+	none	0.212940580470165	none	0.275909366132117	none	0.314139919441439	FALSE
farp1	DreINT0067134	chr1:2246828-2247147	320	chr1:2246723-2246827=2247148-2247190:+	none	0.450420393719624	none	0.501689948820135	none	0.478281334415211	FALSE
farp1	DreINT0067135	chr1:2247191-2249219	2029	chr1:2247148-2247190=2249220-2249298:+	none	0.386532948538518	none	0.433035177957195	none	0.484977285973265	FALSE
farp1	DreINT0067136	chr1:2249299-2252548	3250	chr1:2249220-2249298=2252549-2252646:+	none	0.382345328970036	none	0.436003551377455	none	0.485058169863448	TRUE
farp1	DreINT0067137	chr1:2252647-2253625	979	chr1:2252549-2252646=2253626-2253740:+	none	0.430263764410924	none	0.46108514728114	none	0.53769701337936	FALSE
farp1	DreINT0067138	chr1:2253741-2255111	1371	chr1:2253626-2253740=2255112-2255259:+	none	0.515872191710246	none	0.573984218990009	none	0.548034687702377	FALSE
farp1	DreINT0067139	chr1:2256938-2257561	624	chr1:2256842-2256937=2257562-2257725:+	none	0.668188218931536	none	0.680143081295963	none	0.587349460478339	TRUE
farp1	DreINT0067131	chr1:2257726-2258003	278	chr1:2257562-2257725=2258004-2258072:+	none	0.565878327628162	none	0.608510774614235	none	0.565564966654974	FALSE
farp1	DreINT0067132	chr1:2258073-2259848	1776	chr1:2258004-2258072=2259849-2259924:+	none	0.411830959418623	none	0.439925674543467	none	0.496434671493153	FALSE
farp1	DreINT0067133	chr1:2259925-2260063	139	chr1:2259849-2259924=2260064-2261332:+	none	0.866267889140006	none	0.871817913242788	none	0.852656559860632	TRUE
kpnb3	DreINT0087515	chr1:2112731-2117348	4618	chr1:2112613-2112730=2117349-2117429:+	none	0.331578820409695	none	0.327536574156897	none	0.340859878753369	FALSE
kpnb3	DreINT0087526	chr1:2117430-2122901	5472	chr1:2117349-2117429=2122902-2123094:+	NOT_RETAINED	0.152471274930751	NOT_RETAINED	0.219483266257278	NOT_RETAINED	0.247538255329036	FALSE
kpnb3	DreINT0087533	chr1:2123095-2124413	1319	chr1:2122902-2123094=2124414-2124516:+	none	0.223313937368533	none	0.249947770309918	none	0.273944749878928	FALSE
kpnb3	DreINT0087534	chr1:2124517-2125831	1315	chr1:2124414-2124516=2125832-2125928:+	none	0.428091157369701	none	0.478876094403933	none	0.415927910824896	FALSE
kpnb3	DreINT0087535	chr1:2125929-2126437	509	chr1:2125832-2125928=2126438-2126542:+	none	0.233253122380874	none	0.247603817664835	none	0.317352783360872	FALSE
kpnb3	DreINT0087536	chr1:2126543-2127619	1077	chr1:2126438-2126542=2127620-2127742:+	none	0.318862879027953	none	0.390113166627493	none	0.350346520886999	FALSE
kpnb3	DreINT0087537	chr1:2128334-2128894	561	chr1:2128213-2128333=2128895-2128982:+	none	0.26094182451709	none	0.316884416947446	none	0.327428083606217	FALSE
kpnb3	DreINT0087538	chr1:2128983-2131175	2193	chr1:2128895-2128982=2131176-2131282:+	none	0.413167565799293	none	0.435430225892903	none	0.380181457999012	FALSE
kpnb3	DreINT0087516	chr1:2131283-2131368	86	chr1:2131176-2131282=2131369-2131493:+	none	0.585301491832668	none	0.608742370506598	none	0.502024343778819	FALSE
kpnb3	DreINT0087517	chr1:2131494-2131572	79	chr1:2131369-2131493=2131573-2131662:+	none	0.378653295577304	none	0.371092268782597	none	0.406152576747112	FALSE
kpnb3	DreINT0087518	chr1:2131663-2132899	1237	chr1:2131573-2131662=2132900-2133073:+	none	0.0849663683533351	none	0.118961320611416	none	0.100107453080224	FALSE
kpnb3	DreINT0087519	chr1:2133074-2133620	547	chr1:2132900-2133073=2133621-2133839:+	none	0.308416777080168	none	0.382686461442692	none	0.347987419266471	FALSE
kpnb3	DreINT0087520	chr1:2133840-2135501	1662	chr1:2133621-2133839=2135502-2135585:+	none	0.0310565801368245	none	0.0525721326686515	none	0.0598370821005366	FALSE
kpnb3	DreINT0087521	chr1:2135586-2135667	82	chr1:2135502-2135585=2135668-2135800:+	none	0.70275240847448	none	0.702944157826266	none	0.647960312059852	FALSE
kpnb3	DreINT0087522	chr1:2135801-2137421	1621	chr1:2135668-2135800=2137422-2137543:+	none	0.101107561239708	none	0.13156835132929	none	0.159408765110679	FALSE
kpnb3	DreINT0087523	chr1:2137544-2138234	691	chr1:2137422-2137543=2138235-2138331:+	none	0.23297129751664	none	0.277737779237485	none	0.307260608553962	FALSE
kpnb3	DreINT0087524	chr1:2138332-2139030	699	chr1:2138235-2138331=2139031-2139203:+	none	0.452219584213459	none	0.471968012700913	none	0.51508471412094	FALSE
kpnb3	DreINT0087525	chr1:2139204-2139722	519	chr1:2139031-2139203=2139723-2139834:+	none	0.264721390172144	none	0.336679174289773	none	0.266600391106861	FALSE
kpnb3	DreINT0087527	chr1:2139835-2140718	884	chr1:2139723-2139834=2140719-2140774:+	none	0.38749245528026	none	0.431402688269519	none	0.361349401825379	FALSE
kpnb3	DreINT0087528	chr1:2140775-2140856	82	chr1:2140719-2140774=2140857-2140979:+	none	0.111602898625431	none	0.129412408970021	none	0.136565179775908	FALSE
kpnb3	DreINT0087529	chr1:2140980-2146599	5620	chr1:2140857-2140979=2146600-2146819:+	none	0.257046141749505	none	0.298109016630222	none	0.271968628793428	TRUE
kpnb3	DreINT0087530	chr1:2146820-2148148	1329	chr1:2146600-2146819=2148149-2148377:+	none	0.115417957746093	none	0.174498012241126	none	0.175446813930564	TRUE
kpnb3	DreINT0087531	chr1:2148378-2148912	535	chr1:2148149-2148377=2148913-2149054:+	none	0.442326502331622	none	0.434699797937399	none	0.432793332951553	FALSE
kpnb3	DreINT0087532	chr1:2149055-2150798	1744	chr1:2148913-2149054=2150799-2151759:+	none	0.480403077638153	none	0.539231383422638	none	0.520939872704326	FALSE
si:dkey-265k11.2	DreINT0145204	chr1:39573191-39574547	1357	chr1:39572981-39573190=39574548-39574832:+	none	0.725051468636497	none	0.711484961639287	none	0.679423938470963	TRUE
si:dkey-265k11.2	DreINT0145209	chr1:39574833-39575475	643	chr1:39574548-39574832=39575476-39575569:+	none	0.714139288515572	none	0.752113024633888	none	0.647824633287847	TRUE
si:dkey-265k11.2	DreINT0145210	chr1:39575570-39575704	135	chr1:39575476-39575569=39575705-39575833:+	none	0.561553606270044	none	0.543164659385545	none	0.550415943631793	TRUE
si:dkey-265k11.2	DreINT0145211	chr1:39575834-39576837	1004	chr1:39575705-39575833=39576838-39577024:+	none	0.598465730073771	none	0.671146590809514	none	0.576674391852609	TRUE
si:dkey-265k11.2	DreINT0145212	chr1:39577025-39578042	1018	chr1:39576838-39577024=39578043-39578212:+	none	0.477420274404249	none	0.544557587279572	none	0.559452037701484	TRUE
si:dkey-265k11.2	DreINT0145213	chr1:39578213-39579789	1577	chr1:39578043-39578212=39579790-39579899:+	none	0.759130726311111	none	0.764641580938532	none	0.810402620710887	TRUE
si:dkey-265k11.2	DreINT0145214	chr1:39579900-39580062	163	chr1:39579790-39579899=39580063-39580179:+	none	0.467517504350957	none	0.516247026566453	none	0.55698569838009	TRUE
si:dkey-265k11.2	DreINT0145215	chr1:39580180-39580848	669	chr1:39580063-39580179=39580849-39581031:+	none	0.38738755435262	none	0.401432043383386	none	0.462340179057514	TRUE
si:dkey-265k11.2	DreINT0145216	chr1:39581032-39582574	1543	chr1:39580849-39581031=39582575-39582707:+	none	0.576615208809128	none	0.602111458001647	none	0.596445336195038	TRUE
si:dkey-265k11.2	DreINT0145205	chr1:39582708-39583559	852	chr1:39582575-39582707=39583560-39583712:+	none	0.505443266707897	none	0.54729870615412	none	0.609366855780415	TRUE
si:dkey-265k11.2	DreINT0145206	chr1:39583713-39583868	156	chr1:39583560-39583712=39583869-39583964:+	none	0.539809306174397	none	0.526920859420754	none	0.519455967132525	TRUE
si:dkey-265k11.2	DreINT0145207	chr1:39583965-39584896	932	chr1:39583869-39583964=39584897-39585162:+	none	0.550524899135141	none	0.591563897493117	none	0.606487472354276	TRUE
si:dkey-265k11.2	DreINT0145208	chr1:39585163-39588983	3821	chr1:39584897-39585162=39588984-39589733:+	none	0.915285464190763	none	0.914731721845488	none	0.916737536289777	TRUE
si:dkeyp-9d4.2	DreINT0148224	chr1:7335285-7336331	1047	chr1:7336332-7336478=7335216-7335284:-	none	0.67592937293982	none	0.654911344198346	none	0.598410909757206	TRUE
si:dkeyp-9d4.2	DreINT0148225	chr1:7335073-7335215	143	chr1:7335216-7335284=7335027-7335072:-	none	0.395268833365845	none	0.415291405226353	none	0.390657527284595	TRUE
si:dkeyp-9d4.2	DreINT0148226	chr1:7334658-7335026	369	chr1:7335027-7335072=7334453-7334657:-	none	0.519616587141151	none	0.576149463795773	none	0.557736015587139	TRUE
si:dkeyp-9d4.2	DreINT0148227	chr1:7334237-7334452	216	chr1:7334453-7334657=7334090-7334236:-	none	0.546394135768121	none	0.533568860655112	none	0.519086315402097	TRUE
si:dkeyp-9d4.2	DreINT0148228	chr1:7333994-7334089	96	chr1:7334090-7334236=7333819-7333993:-	none	0.604635620902136	none	0.559743365856481	none	0.608831974424153	TRUE
si:dkeyp-9d4.2	DreINT0148229	chr1:7333666-7333818	153	chr1:7333819-7333993=7333565-7333665:-	none	0.591990292082622	none	0.568958254834435	none	0.577727747025122	TRUE
si:dkeyp-9d4.2	DreINT0148230	chr1:7333486-7333564	79	chr1:7333565-7333665=7332958-7333485:-	none	0.962468123399294	none	0.936426496832828	none	0.943153731423539	TRUE
zgc:111983	DreINT0178404	chr1:44475451-44476003	553	chr1:44476004-44476098=44475387-44475450:-	none	0.662249532357113	none	0.616311841817126	none	0.738289650342342	FALSE
zgc:111983	DreINT0178405	chr1:44475132-44475386	255	chr1:44475387-44475450=44475093-44475131:-	none	0.629126850253263	none	0.635582504314194	none	0.714964450356243	FALSE
zgc:111983	DreINT0178406	chr1:44474950-44475092	143	chr1:44475093-44475131=44474417-44474949:-	none	0.66741033990752	none	0.681920692928304	none	0.635744580686544	TRUE
zgc:111983	DreINT0178407	chr1:44474186-44474416	231	chr1:44474417-44474949=44474124-44474185:-	none	0.663326569031447	none	0.594490590945241	none	0.651088913097643	TRUE
zgc:111983	DreINT0178408	chr1:44473931-44474123	193	chr1:44474124-44474185=44473776-44473930:-	none	0.575186745090535	none	0.590941346552966	none	0.530428202778348	TRUE
zgc:111983	DreINT0178409	chr1:44473607-44473775	169	chr1:44473776-44473930=44473434-44473606:-	none	0.485641727855646	none	0.459899721631552	none	0.524103586569647	TRUE
zgc:111983	DreINT0178410	chr1:44473325-44473433	109	chr1:44473434-44473606=44473266-44473324:-	none	0.318821084938365	none	0.299166011583899	none	0.417138486829061	TRUE
zgc:111983	DreINT0178411	chr1:44473150-44473265	116	chr1:44473266-44473324=44472983-44473149:-	none	0.614296462241882	none	0.588578642484977	none	0.611500317336902	TRUE
zgc:111983	DreINT0178412	chr1:44472740-44472982	243	chr1:44472983-44473149=44472118-44472739:-	none	0.851793800792357	none	0.810100131596142	none	0.872500956942995	TRUE
cpz	DreINT0051665	chr1:40099038-40099766	729	chr1:40098909-40099037=40099767-40099796:+	none	0.397612628246008	none	0.441333175004555	none	0.367883478239734	TRUE
cpz	DreINT0051667	chr1:40099797-40101957	2161	chr1:40099767-40099796=40101958-40102332:+	none	0.2716917596809	none	0.304507586117859	none	0.347456085145002	FALSE
cpz	DreINT0051668	chr1:40102333-40104298	1966	chr1:40101958-40102332=40104299-40104514:+	none	0.334180386209765	none	0.382973701472919	none	0.442988710240573	TRUE
cpz	DreINT0051669	chr1:40104515-40106797	2283	chr1:40104299-40104514=40106798-40106994:+	none	0.562597807289953	none	0.59415394768356	none	0.592776783744002	FALSE
cpz	DreINT0051670	chr1:40106995-40109015	2021	chr1:40106798-40106994=40109016-40109177:+	none	0.44697656543908	none	0.523708677722068	none	0.557475277870747	TRUE
cpz	DreINT0051671	chr1:40109178-40110343	1166	chr1:40109016-40109177=40110344-40110505:+	none	0.42208834552677	none	0.489876541907641	none	0.504839139402441	FALSE
cpz	DreINT0051672	chr1:40110506-40110578	73	chr1:40110344-40110505=40110579-40110714:+	none	0.71936610186429	none	0.668246380476898	none	0.686772762144696	FALSE
cpz	DreINT0051673	chr1:40110715-40111460	746	chr1:40110579-40110714=40111461-40111600:+	none	0.295484333874098	none	0.350721485581917	none	0.337990496142873	FALSE
cpz	DreINT0051674	chr1:40111601-40113423	1823	chr1:40111461-40111600=40113424-40113523:+	none	0.428411820492281	none	0.478420466289656	none	0.503892418421604	FALSE
cpz	DreINT0051666	chr1:40113524-40114998	1475	chr1:40113424-40113523=40114999-40116113:+	none	0.950158523476149	none	0.954684817527065	none	0.931694582652603	FALSE
tusc3	DreINT0169933	chr1:15451819-15459867	8049	chr1:15451678-15451818=15459868-15460008:+	none	0.370221639314374	none	0.376717322225346	none	0.419342758778478	TRUE
tusc3	DreINT0169934	chr1:15460009-15460622	614	chr1:15459868-15460008=15460623-15460712:+	none	0.29135611388992	none	0.332211817793032	none	0.504034873751653	FALSE
tusc3	DreINT0169935	chr1:15460713-15497525	36813	chr1:15460623-15460712=15497526-15497589:+	NOT_RETAINED	0.0240376592303558	NOT_RETAINED	0.0385103385622902	NOT_RETAINED	0.13912150348014	FALSE
tusc3	DreINT0169936	chr1:15497590-15499225	1636	chr1:15497526-15497589=15499226-15499300:+	none	0.397681093761275	none	0.431487292974712	none	0.538936538443395	FALSE
tusc3	DreINT0169937	chr1:15499301-15523390	24090	chr1:15499226-15499300=15523391-15523481:+	none	0.0707440458118394	none	0.0882869297561253	none	0.197313030352508	FALSE
tusc3	DreINT0169938	chr1:15523482-15527173	3692	chr1:15523391-15523481=15527174-15527298:+	none	0.575196841734696	none	0.582710722712628	none	0.736936965575082	FALSE
si:ch211-112b1.3	DreINT0135445	chr1:48402497-48444065	41569	chr1:48444066-48444139=48402224-48402496:-	none	0.052979349525923	none	0.0771293337440626	none	0.1756406998483	TRUE
si:ch211-112b1.3	DreINT0135446	chr1:48399151-48402223	3073	chr1:48402224-48402496=48399078-48399150:-	none	0.374818603149064	none	0.430692822223853	none	0.522705780965594	TRUE
si:ch211-112b1.3	DreINT0135447	chr1:48353534-48399077	45544	chr1:48399078-48399150=48353304-48353533:-	none	0.0710960549581134	none	0.116661175814005	none	0.390495901778965	TRUE
nthl1	DreINT0106949	chr1:53466285-53467598	1314	chr1:53465895-53466284=53467599-53467852:+	none	0.726399037490654	none	0.738324181242491	none	0.667707057918115	FALSE
nthl1	DreINT0106950	chr1:53467853-53467923	71	chr1:53467599-53467852=53467924-53468094:+	none	0.787437241692907	none	0.737868215137813	none	0.77635201459086	TRUE
nthl1	DreINT0106951	chr1:53472313-53474292	1980	chr1:53472153-53472312=53474293-53474398:+	none	0.487896156036038	none	0.564104583163803	none	0.540780510323682	TRUE
nthl1	DreINT0106952	chr1:53474399-53474485	87	chr1:53474293-53474398=53474486-53474747:+	none	0.489114117357919	none	0.521888573836718	none	0.602853838976362	TRUE
nthl1	DreINT0106953	chr1:53474748-53477926	3179	chr1:53474486-53474747=53477927-53478130:+	none	0.688592735857602	none	0.72509984826941	none	0.787829883856361	TRUE
usp38	DreINT0172756	chr1:34741499-34743540	2042	chr1:34741370-34741498=34743541-34744275:+	none	0.818569341154303	none	0.81555453240442	none	0.664204649710952	FALSE
usp38	DreINT0172757	chr1:34744276-34747457	3182	chr1:34743541-34744275=34747458-34747593:+	none	0.426651384446916	none	0.460432612696558	none	0.4877789122754	FALSE
usp38	DreINT0172758	chr1:34747594-34747987	394	chr1:34747458-34747593=34747988-34748117:+	none	0.520356501321855	none	0.506914765240417	none	0.703359432187601	FALSE
usp38	DreINT0172759	chr1:34748118-34748351	234	chr1:34747988-34748117=34748352-34748453:+	none	0.430279724909173	none	0.453988084205121	IR_IN_SNIP1_KD	0.45318967569846	FALSE
usp38	DreINT0172760	chr1:34748454-34749636	1183	chr1:34748352-34748453=34749637-34749854:+	none	0.314940295005293	none	0.380932557560044	none	0.418442569786414	TRUE
usp38	DreINT0172761	chr1:34749855-34750409	555	chr1:34749637-34749854=34750410-34750503:+	none	0.278416017795932	none	0.308168501547616	none	0.377029058570777	TRUE
usp38	DreINT0172762	chr1:34750504-34750642	139	chr1:34750410-34750503=34750643-34750749:+	none	0.699638642449936	none	0.70509615523036	none	0.653523908504298	FALSE
usp38	DreINT0172763	chr1:34750750-34752231	1482	chr1:34750643-34750749=34752232-34753510:+	none	0.810212904408184	IR_IN_RBMX2_KD	0.845260955294611	none	0.763093871638463	FALSE
usp38	DreINT0172764	chr1:34753511-34755962	2452	chr1:34752232-34753510=34755963-34756677:+	none	0.896380698325617	none	0.895925047398112	none	0.896742231964876	FALSE
tmod1	DreINT0165268	chr1:11544795-11550828	6034	chr1:11544678-11544794=11550829-11550985:+	none	0.44442944501228	none	0.44726665734995	none	0.430277658996041	TRUE
tmod1	DreINT0165269	chr1:11550986-11551967	982	chr1:11550829-11550985=11551968-11552087:+	none	0.429293638947504	none	0.468041536896865	none	0.499908902112898	TRUE
tmod1	DreINT0165270	chr1:11552088-11558782	6695	chr1:11551968-11552087=11558783-11558872:+	none	0.191098288457269	none	0.258686833150666	none	0.321580013776666	TRUE
tmod1	DreINT0165271	chr1:11558873-11560462	1590	chr1:11558783-11558872=11560463-11560593:+	none	0.410876190606241	none	0.484780624141749	none	0.479430340609631	TRUE
tmod1	DreINT0165272	chr1:11560594-11560711	118	chr1:11560463-11560593=11560712-11560819:+	none	0.655314589805366	none	0.643400716149049	none	0.688614895792549	TRUE
tmod1	DreINT0165273	chr1:11560820-11564472	3653	chr1:11560712-11560819=11564473-11564616:+	none	0.38308118467887	none	0.434165182878008	none	0.445497853710823	TRUE
tmod1	DreINT0165274	chr1:11564617-11564806	190	chr1:11564473-11564616=11564807-11564951:+	none	0.687448347212233	none	0.693887734465095	none	0.711309375922618	TRUE
tmod1	DreINT0165275	chr1:11564952-11570925	5974	chr1:11564807-11564951=11570926-11571179:+	none	0.921767549250625	none	0.928378058949223	none	0.923546398521638	TRUE
tlr3	DreINT0163847	chr1:17200209-17201146	938	chr1:17200007-17200208=17201147-17201627:+	none	0.682089515971351	none	0.678988306603427	none	0.565841337459679	TRUE
tlr3	DreINT0163848	chr1:17201628-17202058	431	chr1:17201147-17201627=17202059-17202253:+	none	0.500002748565017	none	0.478179231162442	none	0.484712871034381	TRUE
tlr3	DreINT0163849	chr1:17202254-17202755	502	chr1:17202059-17202253=17202756-17204602:+	none	0.96486480360846	none	0.959712129250687	none	0.938156741068415	TRUE
tlr3	DreINT0163850	chr1:17204603-17204854	252	chr1:17202756-17204602=17204855-17205290:+	none	0.979897281113711	none	0.959952815267895	none	0.960924739417439	TRUE
zgc:112980	DreINT0178514	chr1:7868960-7869076	117	chr1:7869077-7869184=7868847-7868959:-	none	0.739416711141554	none	0.668718839235717	none	0.689463715221488	FALSE
zgc:112980	DreINT0178525	chr1:7868297-7868846	550	chr1:7868847-7868959=7868191-7868296:-	none	0.524468982153201	none	0.507392635863953	none	0.5256531419469	TRUE
zgc:112980	DreINT0178527	chr1:7868088-7868190	103	chr1:7868191-7868296=7867994-7868087:-	none	0.576613197280201	none	0.590351079348837	none	0.622617899345899	FALSE
zgc:112980	DreINT0178528	chr1:7866320-7867993	1674	chr1:7867994-7868087=7866163-7866319:-	none	0.393966531814063	none	0.458951973740112	none	0.497271382956841	FALSE
zgc:112980	DreINT0178529	chr1:7866067-7866162	96	chr1:7866163-7866319=7865880-7866066:-	none	0.508564577817574	none	0.477055606610168	none	0.605503804460876	TRUE
zgc:112980	DreINT0178530	chr1:7865771-7865879	109	chr1:7865880-7866066=7865648-7865770:-	none	0.777042104065933	none	0.757439693880739	none	0.806268068442884	FALSE
zgc:112980	DreINT0178531	chr1:7865558-7865647	90	chr1:7865648-7865770=7865504-7865557:-	none	0.554457408042823	none	0.520569396254488	none	0.60794765871163	FALSE
zgc:112980	DreINT0178532	chr1:7865402-7865503	102	chr1:7865504-7865557=7865282-7865401:-	none	0.471519018062979	none	0.463940983926371	none	0.554071321717905	FALSE
zgc:112980	DreINT0178533	chr1:7864540-7865281	742	chr1:7865282-7865401=7864381-7864539:-	none	0.329504980294862	none	0.375244159936791	none	0.39479496297459	FALSE
zgc:112980	DreINT0178515	chr1:7863220-7864380	1161	chr1:7864381-7864539=7863166-7863219:-	none	0.394591719574407	none	0.429376145499405	none	0.479275646642419	TRUE
zgc:112980	DreINT0178516	chr1:7863065-7863165	101	chr1:7863166-7863219=7863022-7863064:-	none	0.459145525368694	none	0.492194251496746	none	0.451275925473617	FALSE
zgc:112980	DreINT0178517	chr1:7862661-7863021	361	chr1:7863022-7863064=7862444-7862660:-	none	0.413605734459646	none	0.474804728468965	none	0.438313074605077	FALSE
zgc:112980	DreINT0178518	chr1:7861189-7862443	1255	chr1:7862444-7862660=7861109-7861188:-	none	0.232548282993887	none	0.295386089696714	none	0.34944488431649	TRUE
zgc:112980	DreINT0178519	chr1:7860591-7861108	518	chr1:7861109-7861188=7860483-7860590:-	none	0.334688922475988	none	0.395135368751933	none	0.362595416961205	TRUE
zgc:112980	DreINT0178520	chr1:7860390-7860482	93	chr1:7860483-7860590=7860309-7860389:-	none	0.52579271486849	none	0.503095617444673	none	0.526115278559668	FALSE
zgc:112980	DreINT0178521	chr1:7859680-7860308	629	chr1:7860309-7860389=7859575-7859679:-	IR_IN_BUD13_KD_F2NEW	0.29781609242768	IR_IN_RBMX2_KD	0.311282377333507	IR_IN_SNIP1_KD	0.331852547937846	FALSE
zgc:112980	DreINT0178522	chr1:7859493-7859574	82	chr1:7859575-7859679=7859380-7859492:-	none	0.537388892085206	none	0.515014421709764	none	0.608393295481417	TRUE
zgc:112980	DreINT0178523	chr1:7859294-7859379	86	chr1:7859380-7859492=7859171-7859293:-	none	0.658736409697476	none	0.626129779257539	none	0.64725148708235	FALSE
zgc:112980	DreINT0178524	chr1:7856173-7859170	2998	chr1:7859171-7859293=7856124-7856172:-	none	0.433362329766076	IR_IN_RBMX2_KD	0.504796289131181	none	0.513574005396988	FALSE
zgc:112980	DreINT0178526	chr1:7856038-7856123	86	chr1:7856124-7856172=7855560-7856037:-	none	0.841822471814387	none	0.779589805981957	none	0.874895326907977	FALSE
si:dkey-1h24.6	DreINT0143735	chr1:28851779-28854625	2847	chr1:28854626-28854790=28851443-28851778:-	none	0.637004187508384	none	0.638218418521898	none	0.518112018501517	TRUE
si:dkey-1h24.6	DreINT0143736	chr1:28851333-28851442	110	chr1:28851443-28851778=28851217-28851332:-	none	0.690097161897297	none	0.612221447763673	none	0.587745906784855	TRUE
si:dkey-1h24.6	DreINT0143737	chr1:28851104-28851216	113	chr1:28851217-28851332=28850016-28851103:-	none	0.968502388819128	none	0.956776532143511	none	0.961427011577445	TRUE
rfx1b	DreINT0126318	chr1:53441639-53447255	5617	chr1:53447256-53447578=53441541-53441638:-	none	0.47165552695295	none	0.514169920097991	none	0.472271799887783	FALSE
rfx1b	DreINT0126326	chr1:53441457-53441540	84	chr1:53441541-53441638=53441388-53441456:-	none	0.540347224324305	none	0.55079808960976	none	0.554873672586258	FALSE
rfx1b	DreINT0126327	chr1:53441246-53441387	142	chr1:53441388-53441456=53441190-53441245:-	none	0.363249401276563	none	0.428562113098542	none	0.466375295562344	FALSE
rfx1b	DreINT0126328	chr1:53441095-53441189	95	chr1:53441190-53441245=53440770-53441094:-	none	0.819949387460582	none	0.831726274900605	none	0.86226784459497	FALSE
rfx1b	DreINT0126329	chr1:53438992-53440769	1778	chr1:53440770-53441094=53438810-53438991:-	none	0.19312548640338	none	0.2668848260067	none	0.280221122328144	FALSE
rfx1b	DreINT0126330	chr1:53438558-53438809	252	chr1:53438810-53438991=53438438-53438557:-	none	0.542501365768621	IR_IN_RBMX2_KD	0.650461029383903	none	0.596611010566915	FALSE
rfx1b	DreINT0126331	chr1:53438363-53438437	75	chr1:53438438-53438557=53438241-53438362:-	none	0.525858653355377	none	0.540207926857296	none	0.574965692199966	FALSE
rfx1b	DreINT0126332	chr1:53438159-53438240	82	chr1:53438241-53438362=53438040-53438158:-	none	0.667865073106392	none	0.66521315527073	none	0.642708301779823	FALSE
rfx1b	DreINT0126333	chr1:53437960-53438039	80	chr1:53438040-53438158=53437850-53437959:-	none	0.801030580832661	none	0.814946700174719	none	0.765151940323425	FALSE
rfx1b	DreINT0126319	chr1:53437776-53437849	74	chr1:53437850-53437959=53437624-53437775:-	none	0.655554802280943	none	0.63053425712249	none	0.724725516480111	FALSE
rfx1b	DreINT0126320	chr1:53435475-53437623	2149	chr1:53437624-53437775=53435377-53435474:-	none	0.427076310324803	none	0.495074867419745	none	0.530578848796832	TRUE
rfx1b	DreINT0126321	chr1:53435289-53435376	88	chr1:53435377-53435474=53435139-53435288:-	none	0.648885808716954	none	0.636216968660096	IR_IN_SNIP1_KD	0.667621967379171	FALSE
rfx1b	DreINT0126322	chr1:53433022-53435138	2117	chr1:53435139-53435288=53432813-53433021:-	IR_IN_BUD13_KD_F2NEW	0.516096570347712	IR_IN_RBMX2_KD	0.610120080760392	IR_IN_SNIP1_KD	0.537497933451827	FALSE
rfx1b	DreINT0126323	chr1:53432683-53432812	130	chr1:53432813-53433021=53432529-53432682:-	none	0.663266048521545	IR_IN_RBMX2_KD	0.67303374369786	none	0.684539326141774	FALSE
rfx1b	DreINT0126324	chr1:53432461-53432528	68	chr1:53432529-53432682=53432415-53432460:-	IR_IN_BUD13_KD_F2NEW	0.638334954298154	IR_IN_RBMX2_KD	0.604890745720921	IR_IN_SNIP1_KD	0.70258702137706	FALSE
rfx1b	DreINT0126325	chr1:53429625-53432414	2790	chr1:53432415-53432460=53428820-53429624:-	none	0.923750113688093	none	0.923909821233565	none	0.903924218355004	TRUE
GPRIN3	DreINT0012139	chr1:50206693-50215153	8461	chr1:50215154-50215255=50203984-50206692:-	none	0.975987549794704	none	0.977913594541157	none	0.983472113962219	TRUE
vps8	DreINT0174377	chr1:29279820-29280116	297	chr1:29279647-29279819=29280117-29280185:+	none	0.620606288150898	none	0.626067196485874	none	0.535802242351363	TRUE
vps8	DreINT0174383	chr1:29280186-29281823	1638	chr1:29280117-29280185=29281824-29281954:+	none	0.32918272718309	none	0.382910401228086	none	0.363416951039977	TRUE
vps8	DreINT0174384	chr1:29281955-29282061	107	chr1:29281824-29281954=29282062-29282158:+	none	0.692150539373115	none	0.685743676796087	none	0.707434593797072	TRUE
vps8	DreINT0174385	chr1:29282159-29283602	1444	chr1:29282062-29282158=29283603-29283635:+	none	0.209480157878254	none	0.256408556409587	none	0.312367649720627	TRUE
vps8	DreINT0174386	chr1:29283636-29283719	84	chr1:29283603-29283635=29283720-29283774:+	none	0.29799856683275	none	0.321381386040571	none	0.461265067647279	TRUE
vps8	DreINT0174387	chr1:29283775-29285209	1435	chr1:29283720-29283774=29285210-29285334:+	none	0.345773741455083	none	0.38772822419639	none	0.411295694788999	TRUE
vps8	DreINT0174388	chr1:29285335-29285452	118	chr1:29285210-29285334=29285453-29285516:+	none	0.537462248940753	none	0.542134450075392	none	0.531381973164182	TRUE
vps8	DreINT0174389	chr1:29414311-29435127	20817	chr1:29414288-29414310=29435128-29435208:+	none	0.126247607210966	none	0.198249322078103	none	0.273114280158146	TRUE
vps8	DreINT0174378	chr1:29435209-29446479	11271	chr1:29435128-29435208=29446480-29446649:+	none	0.247897226522537	none	0.335283836918616	none	0.377078439864217	TRUE
vps8	DreINT0174379	chr1:29446650-29451379	4730	chr1:29446480-29446649=29451380-29451548:+	none	0.279138720475837	none	0.336816324654398	none	0.381371839447462	TRUE
vps8	DreINT0174380	chr1:29451549-29466707	15159	chr1:29451380-29451548=29466708-29466761:+	none	0.109578127933954	none	0.198588992600719	none	0.279526362149658	TRUE
vps8	DreINT0174381	chr1:29466762-29478870	12109	chr1:29466708-29466761=29478871-29478951:+	none	0.368407354960227	none	0.483818934756102	none	0.532532695519757	TRUE
vps8	DreINT0174382	chr1:29478952-29506555	27604	chr1:29478871-29478951=29506556-29506758:+	none	0.168439260905615	none	0.261160203766929	none	0.509654165436437	TRUE
pdxkb	DreINT0112250	chr1:46227617-46233337	5721	chr1:46233338-46233569=46227562-46227616:-	none	0.274157616325155	none	0.332875313358821	none	0.369706912590134	TRUE
pdxkb	DreINT0112252	chr1:46214931-46227561	12631	chr1:46227562-46227616=46214826-46214930:-	none	0.19019455089624	none	0.265571598287276	none	0.348440387380186	TRUE
pdxkb	DreINT0112253	chr1:46207233-46214825	7593	chr1:46214826-46214930=46207149-46207232:-	none	0.299099449525274	none	0.39069093416307	none	0.45465996066756	TRUE
pdxkb	DreINT0112254	chr1:46205158-46207148	1991	chr1:46207149-46207232=46205123-46205157:-	none	0.322546770741837	none	0.35509721163947	none	0.388625209240124	TRUE
pdxkb	DreINT0112255	chr1:46205033-46205122	90	chr1:46205123-46205157=46204947-46205032:-	none	0.587749110671589	none	0.614121551600152	none	0.564639835957229	TRUE
pdxkb	DreINT0112256	chr1:46204771-46204946	176	chr1:46204947-46205032=46204725-46204770:-	none	0.565761871382613	none	0.583124177921232	none	0.631191425578813	TRUE
pdxkb	DreINT0112257	chr1:46203621-46204724	1104	chr1:46204725-46204770=46203509-46203620:-	none	0.241943145638052	none	0.308980250554368	none	0.286758639940322	TRUE
pdxkb	DreINT0112258	chr1:46200487-46203508	3022	chr1:46203509-46203620=46200350-46200486:-	none	0.530488293888185	none	0.59019693359418	none	0.56880026861656	TRUE
pdxkb	DreINT0112259	chr1:46200243-46200349	107	chr1:46200350-46200486=46200176-46200242:-	none	0.593228696172962	none	0.592185690554288	none	0.69310880065681	TRUE
pdxkb	DreINT0112251	chr1:46197277-46200175	2899	chr1:46200176-46200242=46196801-46197276:-	none	0.635319466665656	none	0.681486604575631	none	0.738599345196372	TRUE
ppp3r1b	DreINT0118987	chr1:50933354-50947377	14024	chr1:50947378-50947637=50933314-50933353:-	none	0.155659836419608	none	0.169059601844164	none	0.218019828070015	FALSE
ppp3r1b	DreINT0118988	chr1:50923720-50933313	9594	chr1:50933314-50933353=50923543-50923719:-	none	0.209318102889663	none	0.238512372433935	none	0.278272094766235	FALSE
ppp3r1b	DreINT0118989	chr1:50921663-50923542	1880	chr1:50923543-50923719=50921603-50921662:-	none	0.142054795894032	none	0.167568954539098	none	0.20138048961893	FALSE
ppp3r1b	DreINT0118990	chr1:50919033-50921602	2570	chr1:50921603-50921662=50918848-50919032:-	none	0.288690932701873	none	0.30833529083312	none	0.366290684908131	FALSE
ppp3r1b	DreINT0118991	chr1:50916063-50918847	2785	chr1:50918848-50919032=50913990-50916062:-	none	0.936955864410418	none	0.941380580260573	none	0.928168237267861	TRUE
STIM2 (2 of 2)	DreINT0020295	chr1:13781981-13786424	4444	chr1:13781848-13781980=13786425-13786539:+	none	0.56840220974838	none	0.631580665320221	none	0.591020571672466	TRUE
STIM2 (2 of 2)	DreINT0020297	chr1:13786540-13786632	93	chr1:13786425-13786539=13786633-13786744:+	none	0.618191763187354	none	0.60443121170778	none	0.619391736149784	TRUE
STIM2 (2 of 2)	DreINT0020298	chr1:13786745-13788217	1473	chr1:13786633-13786744=13788218-13788333:+	none	0.519189047918737	none	0.554973626069294	none	0.560026894762058	TRUE
STIM2 (2 of 2)	DreINT0020299	chr1:13788334-13788587	254	chr1:13788218-13788333=13788588-13788765:+	none	0.603801870374491	none	0.602875576681502	none	0.61855999004463	TRUE
STIM2 (2 of 2)	DreINT0020300	chr1:13788766-13789704	939	chr1:13788588-13788765=13789705-13789882:+	none	0.333381246319594	none	0.430437537537262	none	0.395959157679915	TRUE
STIM2 (2 of 2)	DreINT0020301	chr1:13789883-13789960	78	chr1:13789705-13789882=13789961-13790122:+	none	0.822220926783428	none	0.815440704264958	none	0.768976761237997	TRUE
STIM2 (2 of 2)	DreINT0020302	chr1:13790123-13791040	918	chr1:13789961-13790122=13791041-13791141:+	none	0.690681772038336	none	0.681203855062677	none	0.640617300280932	TRUE
STIM2 (2 of 2)	DreINT0020303	chr1:13791142-13791712	571	chr1:13791041-13791141=13791713-13791951:+	none	0.397781858406052	none	0.427100139675071	none	0.482709657566298	TRUE
STIM2 (2 of 2)	DreINT0020304	chr1:13791952-13793383	1432	chr1:13791713-13791951=13793384-13793567:+	none	0.542990561159751	none	0.560160059282773	none	0.535638890991429	TRUE
STIM2 (2 of 2)	DreINT0020296	chr1:13793568-13795360	1793	chr1:13793384-13793567=13795361-13798179:+	none	0.994683582447833	none	0.995082874967534	none	0.988304055987249	TRUE
mxd4	DreINT0099315	chr1:25378387-25378807	421	chr1:25378155-25378386=25378808-25378904:+	none	0.745604699226886	none	0.715096781474451	none	0.65352026661181	FALSE
mxd4	DreINT0099316	chr1:25378905-25380707	1803	chr1:25378808-25378904=25380708-25380737:+	none	0.395421775602933	none	0.407290098710331	none	0.450392885797689	TRUE
mxd4	DreINT0099317	chr1:25380738-25392002	11265	chr1:25380708-25380737=25392003-25392117:+	none	0.197536692692452	none	0.234711665311295	none	0.319308535831159	TRUE
mxd4	DreINT0099318	chr1:25392118-25395178	3061	chr1:25392003-25392117=25395179-25395338:+	none	0.521582453943714	none	0.603546916316639	none	0.513666067440191	TRUE
mxd4	DreINT0099319	chr1:25395339-25399573	4235	chr1:25395179-25395338=25399574-25402858:+	none	0.991501338959743	none	0.993863298209672	none	0.98544773080167	TRUE
tenm3	DreINT0161979	chr1:38835278-38879738	44461	chr1:38834967-38835277=38879739-38879945:+	none	0.0206010447313765	none	0.039095427202675	none	0.117853014710869	FALSE
tenm3	DreINT0161997	chr1:38902335-38921433	19099	chr1:38902106-38902334=38921434-38921672:+	none	0.0805416470878579	none	0.128056681200909	none	0.239220977290058	FALSE
tenm3	DreINT0161998	chr1:38921673-38939739	18067	chr1:38921434-38921672=38939740-38939862:+	NOT_RETAINED	0.0806083499152685	NOT_RETAINED	0.122163838685005	NOT_RETAINED	0.196489085296682	FALSE
tenm3	DreINT0161999	chr1:38962857-38966395	3539	chr1:38962651-38962856=38966396-38966606:+	none	0.507834371072981	none	0.529373151912968	none	0.518299052315603	FALSE
tenm3	DreINT0162000	chr1:38966607-38976388	9782	chr1:38966396-38966606=38976389-38976490:+	none	0.117193628994835	none	0.140157838055134	none	0.211934445221267	TRUE
tenm3	DreINT0162001	chr1:38976491-38978787	2297	chr1:38976389-38976490=38978788-38978982:+	none	0.307992599592229	none	0.390453997085858	none	0.375547394658392	FALSE
tenm3	DreINT0162002	chr1:38978983-38982336	3354	chr1:38978788-38978982=38982337-38982537:+	none	0.321883934186441	none	0.389565256369426	none	0.416466211368635	FALSE
tenm3	DreINT0161980	chr1:38982538-38987252	4715	chr1:38982337-38982537=38987253-38987438:+	none	0.296517751632744	none	0.410358653065853	none	0.408778746802898	FALSE
tenm3	DreINT0161981	chr1:38987439-39003454	16016	chr1:38987253-38987438=39003455-39003601:+	none	0.136686246572653	none	0.203184397164405	none	0.249060394375915	FALSE
tenm3	DreINT0161982	chr1:39003602-39006551	2950	chr1:39003455-39003601=39006552-39006768:+	none	0.354256407881974	none	0.493240269194288	none	0.426946125723377	FALSE
tenm3	DreINT0161983	chr1:39006769-39014421	7653	chr1:39006552-39006768=39014422-39014541:+	none	0.220794140309088	none	0.279130718165104	none	0.33429239087475	FALSE
tenm3	DreINT0161984	chr1:39014542-39017396	2855	chr1:39014422-39014541=39017397-39017658:+	none	0.258206892749601	none	0.347010078545005	none	0.383536145264602	FALSE
tenm3	DreINT0161985	chr1:39017659-39021006	3348	chr1:39017397-39017658=39021007-39021274:+	none	0.490260807267204	none	0.526790836027346	none	0.5504106099774	FALSE
tenm3	DreINT0161986	chr1:39021275-39023316	2042	chr1:39021007-39021274=39023317-39023460:+	none	0.348993744168943	none	0.419953420368579	none	0.430849597241273	FALSE
tenm3	DreINT0161987	chr1:39023461-39037494	14034	chr1:39023317-39023460=39037495-39037744:+	none	0.149604897981816	none	0.214137563036202	none	0.274734106339744	FALSE
tenm3	DreINT0161988	chr1:39037745-39045648	7904	chr1:39037495-39037744=39045649-39045881:+	none	0.167995143137156	none	0.274810845949566	none	0.28778173527621	FALSE
tenm3	DreINT0161989	chr1:39045882-39046344	463	chr1:39045649-39045881=39046345-39046499:+	none	0.619425433958572	none	0.624248910250318	none	0.599657486916148	FALSE
tenm3	DreINT0161990	chr1:39046500-39049179	2680	chr1:39046345-39046499=39049180-39050054:+	none	0.638997239200365	none	0.682438972000976	none	0.573473387252072	TRUE
tenm3	DreINT0161991	chr1:39050055-39052213	2159	chr1:39049180-39050054=39052214-39052389:+	none	0.549755610758473	none	0.539970078763628	none	0.5056274556995	TRUE
tenm3	DreINT0161992	chr1:39052390-39053234	845	chr1:39052214-39052389=39053235-39053470:+	none	0.438323790323689	none	0.456119364942291	none	0.479109642830841	FALSE
tenm3	DreINT0161993	chr1:39053471-39053894	424	chr1:39053235-39053470=39053895-39054191:+	none	0.523932829758448	none	0.521753206978448	none	0.499695027407362	FALSE
tenm3	DreINT0161994	chr1:39054192-39055735	1544	chr1:39053895-39054191=39055736-39057347:+	none	0.903280280209589	none	0.908765771389555	none	0.837669360401689	FALSE
tenm3	DreINT0161995	chr1:39057348-39057472	125	chr1:39055736-39057347=39057473-39057603:+	none	0.941681830074464	none	0.818439513985751	none	0.897299025914897	FALSE
tenm3	DreINT0161996	chr1:39057604-39057884	281	chr1:39057473-39057603=39057885-39061840:+	none	0.997864439731045	none	0.996855149785411	none	0.993944822135294	FALSE
trpc5a	DreINT0168285	chr1:9936043-9936119	77	chr1:9936120-9936234=9935866-9936042:-	none	0.832493258256594	none	0.765216096359415	none	0.760270353692583	TRUE
[truncated: 179,290 more rows]
